# Supplementary material for: HPF1 and nucleosomes mediate a dramatic switch in activity of PARP1 from polymerase to hydrolase
Source: eLife. 2021 Mar 8;10:e65773. doi: 10.7554/eLife.65773 (PMC8012059; doi:10.7554/eLife.65773)
Supplement: Figure 2—figure supplement 1—source data 1. [file elife-65773-fig2-figsupp1-data1.xlsx]

## Sheet: Sheet1
nM DNA	5.8	8.7	13	20	30	44	66	100	148	222	333	500
0	0.0649187	0.0741511	0.0910433	0.100394	0.121703	0.157519	0.166055	0.171898	0.180416	0.210314	0.257226	0.257226
20	0.262823	0.33429	0.447602	0.43753	0.719368	0.807316	0.917264	1.10966	0.360885	1.20397	1.48508	1.48508
40	0.418067	0.535587	0.739748	0.705569	1.09346	1.30864	1.47896	1.78104	0.363008	1.97292	2.47606	2.47606
60	0.541565	0.704469	0.938465	0.949246	1.34013	1.55433	1.71239	2.11213	0.367895	2.43161	2.93885	2.93885
80	0.645928	0.887849	1.19826	1.30832	1.68911	2.00049	2.32542	2.56131	0.47577	3.40811	3.96837	3.96837
100	0.818391	1.02605	1.38453	1.40423	1.93918	2.31631	2.66316	3.35691	0.605136	3.86469	4.66185	4.66185
120	0.819606	1.09819	1.46406	1.49185	2.13142	2.38291	2.62868	3.1359	0.714706	3.82479	4.26214	4.26214
140	0.950503	1.29429	1.57352	1.65742	2.37988	2.73787	3.26751	3.95113	0.613676	4.62248	5.35058	5.35058
