# Supplementary material for: HPF1 and nucleosomes mediate a dramatic switch in activity of PARP1 from polymerase to hydrolase
Source: eLife. 2021 Mar 8;10:e65773. doi: 10.7554/eLife.65773 (PMC8012059; doi:10.7554/eLife.65773)
Supplement: Figure 2—source data 1. [file elife-65773-fig2-data1.xlsx]

## Sheet: Fig2B
nM DNA	0.5	1.0	2.0	3.9	7.8	15.6	31.3	62.5	125.0	250.0	500.0	1000.0
0	0.32	0.36	0.41	0.4	0.39	0.39	0.4	0.4	0.37	0.38	0.36	0.33
20	0.37	0.42	0.47	0.47	0.48	0.49	0.58	0.64	0.76	0.81	0.88	0.91
40	0.41	0.46	0.54	0.56	0.59	0.62	0.86	1.07	1.37	1.44	1.64	1.79
60	0.45	0.52	0.64	0.72	0.79	0.83	1.27	1.76	2.04	2.29	2.61	2.82
80	0.48	0.57	0.72	0.85	1.01	0.96	1.49	2.17	2.77	2.73	3.23	3.78
100	0.5	0.64	0.8	0.96	1.1	1.11	1.81	2.37	2.99	3.14	3.61	4.56
120	0.5	0.68	0.95	1.07	1.23	1.21	1.99	2.62	3.36	3.97	4.34	5
150	0.53	0.7	0.97	1.19	1.2	1.19	2.17	3.36	3.51	4.08	4.82	5.99

## Sheet: Fig2C
[NAD+] (µM)	p18mer	Nuc165	Nuc165/HPF1
5.78051	0.05	0.1	0.12
8.67076	0.08	0.28	0.31
13.0061	0.11	0.39	0.46
19.5092	0.14	0.37	0.44
29.2638	0.18	0.6	0.58
43.8957	0.27	0.72	0.82
65.8436	0.33	0.77	0.94
98.7654	0.39	0.9	1.05
148.148	0.44	1.03	1.18
222.222	0.47	1.18	1.39
333.333	0.46	1.16	1.38
500	0.46	1.43	1.23

## Sheet: Fig2D
nM	p165mer			Nuc165			p621mer			LE-Tri
	mean	stdev	n	mean	stdev	n	mean	stdev	n	mean	stdev	n
0.05	0.01	0.01	3				0.45	0.02	3
0.1	0.01	0	3				0.53	0.02	3
0.2	0.11	0.02	3				0.66	0.02	3
0.39	0.28	0.04	3				0.87	0.02	3
0.78	0.5	0.07	3				1.14	0.08	3
1.56	0.88	0.11	3				1.42	0.06	3
3.13	1.73	0.19	3				1.45	0.06	3
6.25	2.75	0.23	3				2.02	0.2	3
12.5	3.38	0.21	3				2.41	0.12	3
25	3.52	0.22	3				2.54	0.36	3
50	3.28	0.21	3				2.8	0.52	3
100	3.63	0.22	3				3.2	0.02	3
0.24				0.17	0.08	3				0.4	0.01	3
0.49				0.23	0.03	3				0.72	0.06	3
0.98				0.42	0.03	3				1.26	0.09	3
1.95				0.82	0.08	3				2.06	0.1	3
3.91				1.42	0.15	3				2.99	0.03	3
7.81				1.82	0.36	3				4	0.13	3
15.63				3.65	0.25	3				5.62	0.33	3
31.25				5.51	0.2	3				7.32	0.4	3
62.5				6.12	0.11	3				8.79	0.22	3
125				6.56	0.44	3				9.44	0.58	3
250				7.02	0.08	3				10.43	0.3	3
500				8.19	0.36	3				10.88	0.48	3
