# Supplementary material for: HPF1 and nucleosomes mediate a dramatic switch in activity of PARP1 from polymerase to hydrolase
Source: eLife. 2021 Mar 8;10:e65773. doi: 10.7554/eLife.65773 (PMC8012059; doi:10.7554/eLife.65773)
Supplement: Figure 3—source data 1. [file elife-65773-fig3-data1.xlsx]

## Sheet: Fig3B
time (s)	PARP1 (- HPF1)				PARP1 (+HPF1)				histones (+HPF1)				HPF1 (+HPF1)
	run1	run2	run3	run 4	run1	run2	run3		run1	run2	run3		run1	run2	run3	run 4
0	0				0				0				0
10	2.04	1.99	2.4		1.71	0.8	1.32		6.08	4.91	6.57		0.80092	0.753722	0.72	0.42
20	3.84	3.13	4.31	4.56	2.04	1.29	1.44		7.12	6	6.91		1.12179	0.730651	0.78	0.74
30	4.68	4.33	5.58	5.64	2.43	1.59	1.86		7.34	6.66	7.99		1.2117	1.0548	0.75	0.85
40	5.38		5.81	6.48	2.35	1.73	2.08		7.25	6.52	8.91		1.18831	1.17561	0.76	0.97

## Sheet: Fig3C
		PARP1 (- HPF1)				PARP1 (+HPF1)				histones (+HPF1)				HPF1 (+HPF1)
		mean	stdev	n		mean	stdev	n		mean	stdev	n		mean	stdev	n
p18mer		6.6	0.9	4		8.4	3.8	4		5.4	2.4	4
Nuc147		17.8	2.1	4		6.7	1.2	4		27	5	4		3	1	2
Nuc165		13.9	2	4		5.2	1.8	4		10.1	1.3	4		1.8	0.6	3
Nuc207		17.9	4.5	4		8.1	1.7	4		28	11.6	4		3	0.6	4
NLE-Tri		20.3	4.3	4		4.7	1.3	4		15	6.3	4		3	1	2
LE-Tri		21.8	6.6	4		9.2	0.2	3		25.5	4.2	4		4.7	0.4	3

## Sheet: Fig3D
PARP1 alone	0.03	0.05	0.11	0.09
PARP1 + HPF1	0.96	0.8	0.78	0.92
peptide + HPF1	0.97	0.83	0.87	0.93
