# Supplementary material for: HPF1 and nucleosomes mediate a dramatic switch in activity of PARP1 from polymerase to hydrolase
Source: eLife. 2021 Mar 8;10:e65773. doi: 10.7554/eLife.65773 (PMC8012059; doi:10.7554/eLife.65773)
Supplement: Figure 4—source data 1. [file elife-65773-fig4-data1.xlsx]

## Sheet: Fig4B
nM HPF1	WT	D283A	E284A
10000	23332.8	5084.21	25404.3
6000	23621	9478.01	25583.2
3600	21762	2904.39	25451.4
2160	18178.5	5002.59	23923.7
1296	15385.3	2814.26	20129.7
778	14881	3699.23	19887.6
467	10722.3	1133.09	16760.9
280	7818.54	1451.65	14806.2
168	5559.11	873.55	12031.3
101	3299.78	820.043	9010.27
60	2474.96	739.906	6679.78
36	1737.05	131.269	4957.18
22	1242.48	437.988	3028.04
13.1	922.323	78.3868	2376.53
7.8	-121.284	-281.488	1631.17
4.7	320.04	-63.4546	958.496
2.8	338.851	105.36	564.37
1.7	653.763	461.606	775.095
1	-16.9771	-158.303	403.237
0.6	-231.579	110.16	317.171

## Sheet: Fig4C
	WT													D283A												E284A												E292A
	782	812	738	1045	638	951	684	889	825	724	886	501		10000	10000	10000	10000	10000	10000							117	141	210	71									649	1007	774	543
[truncated: 3 more columns]
