# Supplementary material for: HPF1 and nucleosomes mediate a dramatic switch in activity of PARP1 from polymerase to hydrolase
Source: eLife. 2021 Mar 8;10:e65773. doi: 10.7554/eLife.65773 (PMC8012059; doi:10.7554/eLife.65773)
Supplement: Figure 5—source data 1. [file elife-65773-fig5-data1.xlsx]

## Sheet: Fig5A
time (min)	0 s	7 s	15 s	25 s	50 s	120 s	300 s	1200 s	3600 s
-0.0355	-1.58405	-1.52731	-1.51014	-1.52636	-1.58644	-1.58262	-1.62935	-1.63364	-1.57547
-0.0288333	-1.58262	-1.52206	-1.5111	-1.53065	-1.59216	-1.58548	-1.62935	-1.63364	-1.57118
-0.0221667	-1.5831	-1.51873	-1.51253	-1.53732	-1.59836	-1.58834	-1.62935	-1.63364	-1.56736
-0.0155	-1.58405	-1.51777	-1.51682	-1.54734	-1.60456	-1.59073	-1.62983	-1.63317	-1.5645
-0.0088333	-1.58358	-1.5173	-1.52302	-1.5583	-1.60885	-1.59121	-1.63031	-1.63317	-1.5626
-0.0021667	-1.58072	-1.51491	-1.52969	-1.56784	-1.61123	-1.5893	-1.62935	-1.63126	-1.56069
0.0045	-1.57642	-1.50967	-1.53399	-1.57499	-1.61219	-1.58548	-1.62697	-1.62745	-1.5583
0.0111667	-1.57022	-1.50156	-1.53589	-1.57785	-1.61028	-1.58072	-1.6222	-1.62077	-1.55544
0.0178333	-1.56021	-1.48916	-1.53446	-1.57642	-1.60313	-1.57404	-1.61505	-1.61028	-1.5502
0.0245	-1.54686	-1.4739	-1.52874	-1.56975	-1.59168	-1.56355	-1.60456	-1.5955	-1.54209
0.0311667	-1.5316	-1.45817	-1.5192	-1.55878	-1.57881	-1.55258	-1.59216	-1.5769	-1.53208
0.0378333	-1.51682	-1.44339	-1.50967	-1.54829	-1.56593	-1.54209	-1.57976	-1.55783	-1.52159
0.0445	-1.50251	-1.43003	-1.50299	-1.53875	-1.5521	-1.53399	-1.56784	-1.54066	-1.51205
0.0511667	-1.49012	-1.4205	-1.49775	-1.53208	-1.53875	-1.52731	-1.55878	-1.52588	-1.50394
0.0578333	-1.48058	-1.41382	-1.49488	-1.52874	-1.52826	-1.52159	-1.55306	-1.51348	-1.49727
0.0645	-1.47438	-1.41001	-1.49536	-1.52874	-1.52206	-1.5173	-1.54972	-1.5049	-1.49202
0.0711667	-1.472	-1.40667	-1.49965	-1.53303	-1.5192	-1.51491	-1.54877	-1.50013	-1.48821
0.0778333	-1.47104	-1.40429	-1.50537	-1.53923	-1.5192	-1.51348	-1.54972	-1.49775	-1.48439
0.0845	-1.47057	-1.40381	-1.51157	-1.54638	-1.52206	-1.513	-1.55258	-1.49488	-1.48153
0.0911667	-1.46961	-1.40429	-1.51777	-1.55401	-1.52779	-1.51348	-1.55592	-1.49059	-1.47963
0.0978333	-1.46866	-1.40476	-1.52493	-1.56021	-1.53542	-1.51491	-1.5583	-1.48726	-1.47867
0.1045	-1.46723	-1.40524	-1.53303	-1.56498	-1.54209	-1.51825	-1.56069	-1.48535	-1.4782
0.111167	-1.46484	-1.40667	-1.54066	-1.56832	-1.54686	-1.52206	-1.5626	-1.48344	-1.47963
0.117833	-1.46198	-1.40905	-1.54924	-1.57261	-1.55115	-1.5254	-1.56307	-1.48249	-1.48296
0.1245	-1.46008	-1.41287	-1.5564	-1.57738	-1.55449	-1.52779	-1.56164	-1.48344	-1.48821
0.131167	-1.45817	-1.41716	-1.5626	-1.5831	-1.55687	-1.52922	-1.55926	-1.48582	-1.49441
0.137833	-1.45626	-1.42193	-1.56689	-1.58882	-1.5583	-1.52969	-1.55735	-1.48773	-1.50108
0.1445	-1.45531	-1.4267	-1.57022	-1.59502	-1.56021	-1.53112	-1.55497	-1.49059	-1.50871
0.151167	-1.45578	-1.43194	-1.57309	-1.60122	-1.56212	-1.53303	-1.55258	-1.49298	-1.51634
0.157833	-1.45674	-1.43719	-1.57642	-1.60646	-1.5645	-1.53637	-1.54924	-1.49393	-1.52397
0.1645	-1.45674	-1.44291	-1.58072	-1.61123	-1.56689	-1.53971	-1.54591	-1.49441	-1.5316
0.171167	-1.45578	-1.45006	-1.58644	-1.616	-1.56975	-1.54304	-1.54209	-1.49584	-1.53875
0.177833	-1.45531	-1.45769	-1.59311	-1.62029	-1.57166	-1.54686	-1.5378	-1.49775	-1.54686
0.1845	-1.45531	-1.4658	-1.59979	-1.62458	-1.57356	-1.54972	-1.53351	-1.49918	-1.55544
0.191167	-1.45578	-1.47247	-1.60599	-1.62745	-1.57642	-1.55258	-1.52969	-1.50013	-1.5645
0.197833	-1.45721	-1.47915	-1.61076	-1.62935	-1.57976	-1.55497	-1.52636	-1.50204	-1.57356
0.2045	-1.46151	-1.48535	-1.61409	-1.63174	-1.58358	-1.5583	-1.52206	-1.50442	-1.58262
0.211167	-1.4677	-1.49012	-1.61695	-1.63412	-1.58691	-1.56164	-1.51777	-1.50681	-1.59073
0.217833	-1.47438	-1.49488	-1.61934	-1.63651	-1.59073	-1.5645	-1.51253	-1.50967	-1.5974
0.2245	-1.47963	-1.50156	-1.62077	-1.63889	-1.59502	-1.56546	-1.50728	-1.51348	-1.60313
0.231167	-1.48439	-1.50919	-1.62125	-1.64175	-1.59788	-1.56546	-1.50204	-1.5173	-1.60694
0.237833	-1.48916	-1.51682	-1.62125	-1.64413	-1.60074	-1.56546	-1.49727	-1.52159	-1.60885
0.2445	-1.49345	-1.52397	-1.62125	-1.64604	-1.60217	-1.56593	-1.49393	-1.52636	-1.6098
0.251167	-1.49727	-1.53017	-1.62172	-1.647	-1.60408	-1.56593	-1.49107	-1.53303	-1.61076
0.257833	-1.50251	-1.53446	-1.6222	-1.64747	-1.60551	-1.56498	-1.48869	-1.53923	-1.61362
0.2645	-1.50824	-1.5378	-1.62363	-1.64843	-1.60694	-1.56498	-1.48582	-1.54638	-1.61791
0.271167	-1.51491	-1.54114	-1.62601	-1.65033	-1.60837	-1.56498	-1.48296	-1.55544	-1.62268
0.277833	-1.52111	-1.54495	-1.62983	-1.65224	-1.6098	-1.5626	-1.48058	-1.56498	-1.62792
0.2845	-1.52683	-1.54877	-1.63364	-1.65415	-1.61076	-1.55878	-1.47867	-1.57452	-1.63364
0.291167	-1.5316	-1.55306	-1.63603	-1.65558	-1.61171	-1.55354	-1.47867	-1.58262	-1.63841
0.297833	-1.53637	-1.55783	-1.63794	-1.65796	-1.61219	-1.54877	-1.47963	-1.59073	-1.64223
0.3045	-1.54161	-1.56307	-1.63984	-1.66178	-1.61219	-1.544	-1.48106	-1.59693	-1.64509
0.311167	-1.54686	-1.56736	-1.64032	-1.66416	-1.61314	-1.53923	-1.48201	-1.6017	-1.64747
0.317833	-1.55258	-1.5707	-1.6408	-1.66512	-1.61457	-1.53637	-1.48249	-1.60551	-1.6489
0.3245	-1.55783	-1.57213	-1.64032	-1.66512	-1.61648	-1.53446	-1.48296	-1.60933	-1.64986
0.331167	-1.5626	-1.57309	-1.64032	-1.66607	-1.61791	-1.53255	-1.48296	-1.61266	-1.64986
0.337833	-1.56593	-1.57309	-1.63984	-1.6675	-1.61982	-1.52874	-1.48296	-1.61552	-1.64938
0.3445	-1.56832	-1.57213	-1.63937	-1.66893	-1.62125	-1.52493	-1.48439	-1.61791	-1.64795
0.351167	-1.57022	-1.56975	-1.63889	-1.67084	-1.62315	-1.52111	-1.48726	-1.62077	-1.64652
0.357833	-1.57261	-1.56832	-1.63889	-1.67227	-1.62411	-1.51682	-1.49155	-1.62315	-1.64652
0.3645	-1.57547	-1.56927	-1.6408	-1.67418	-1.62554	-1.51253	-1.49632	-1.62554	-1.647
0.371167	-1.57833	-1.57213	-1.64413	-1.67608	-1.62697	-1.50967	-1.50204	-1.6284	-1.64747
0.377833	-1.58167	-1.57452	-1.64795	-1.67704	-1.62888	-1.50871	-1.50871	-1.63126	-1.64843
0.3845	-1.58548	-1.5769	-1.65176	-1.67751	-1.63031	-1.50824	-1.51634	-1.63555	-1.64938
0.391167	-1.5893	-1.57881	-1.65606	-1.67751	-1.63031	-1.50728	-1.52493	-1.63937	-1.65081
0.397833	-1.59216	-1.58024	-1.66035	-1.67894	-1.63031	-1.50633	-1.53303	-1.64318	-1.65081
0.4045	-1.59407	-1.58119	-1.66321	-1.67942	-1.6284	-1.50537	-1.54209	-1.64604	-1.64986
0.411167	-1.59502	-1.58072	-1.66464	-1.67751	-1.62506	-1.5049	-1.55067	-1.6489	-1.6489
0.417833	-1.59454	-1.58024	-1.66607	-1.67513	-1.62077	-1.50442	-1.5583	-1.65176	-1.64795
0.4245	-1.59264	-1.58215	-1.66655	-1.67322	-1.616	-1.5049	-1.56546	-1.65415	-1.647
0.431167	-1.5893	-1.58501	-1.66607	-1.67322	-1.61076	-1.50537	-1.57213	-1.65462	-1.64604
0.437833	-1.58501	-1.58787	-1.66464	-1.67227	-1.60408	-1.50633	-1.57976	-1.65462	-1.64604
0.4445	-1.58167	-1.59025	-1.66416	-1.67179	-1.59693	-1.50728	-1.58739	-1.65558	-1.64795
0.451167	-1.57976	-1.59168	-1.66368	-1.67131	-1.59121	-1.50728	-1.59311	-1.65701	-1.65129
0.457833	-1.57785	-1.59168	-1.66321	-1.67084	-1.58596	-1.50824	-1.59931	-1.65749	-1.65415
0.4645	-1.57642	-1.59025	-1.66321	-1.66941	-1.57928	-1.51014	-1.60551	-1.65844	-1.65749
0.471167	-1.57642	-1.58834	-1.66273	-1.66702	-1.57261	-1.51348	-1.61171	-1.66082	-1.66035
0.477833	-1.57738	-1.58644	-1.66273	-1.66559	-1.56641	-1.51873	-1.61552	-1.66321	-1.66273
0.4845	-1.57928	-1.58644	-1.66273	-1.66512	-1.56164	-1.5254	-1.61791	-1.66416	-1.66512
0.491167	-1.58072	-1.58739	-1.66273	-1.66368	-1.55735	-1.53399	-1.62172	-1.66273	-1.66655
0.497833	-1.5831	-1.58882	-1.66225	-1.6613	-1.55306	-1.54352	-1.62506	-1.66082	-1.6675
0.5045	-1.58501	-1.59073	-1.6613	-1.65749	-1.5502	-1.5521	-1.62697	-1.65892	-1.6675
0.511167	-1.58596	-1.59168	-1.66035	-1.65319	-1.54734	-1.55926	-1.62745	-1.65653	-1.66607
0.517833	-1.58501	-1.59216	-1.65939	-1.64843	-1.54543	-1.56593	-1.63031	-1.65415	-1.66416
0.5245	-1.58167	-1.59216	-1.65844	-1.64366	-1.54304	-1.57166	-1.63412	-1.65319	-1.66178
0.531167	-1.57785	-1.59168	-1.65558	-1.63937	-1.53875	-1.57595	-1.63603	-1.65367	-1.65939
0.537833	-1.57404	-1.59168	-1.65224	-1.6346	-1.53494	-1.57881	-1.63603	-1.65462	-1.65844
0.5445	-1.57213	-1.59264	-1.64795	-1.63031	-1.53065	-1.58167	-1.63651	-1.65606	-1.65796
0.551167	-1.57213	-1.59502	-1.6427	-1.62411	-1.52731	-1.58596	-1.63841	-1.65892	-1.65796
0.557833	-1.57356	-1.59645	-1.63603	-1.61695	-1.52445	-1.59025	-1.63937	-1.66178	-1.65844
0.5645	-1.57738	-1.59788	-1.62935	-1.60933	-1.52206	-1.59359	-1.63889	-1.66464	-1.65892
0.571167	-1.58262	-1.59836	-1.62363	-1.60265	-1.52159	-1.5974	-1.63889	-1.66607	-1.65844
0.577833	-1.58739	-1.59884	-1.61839	-1.59788	-1.52254	-1.6017	-1.64032	-1.66702	-1.65653
0.5845	-1.59121	-1.59979	-1.61409	-1.59407	-1.52493	-1.60742	-1.6408	-1.66702	-1.65415
0.591167	-1.59311	-1.60074	-1.61076	-1.59121	-1.52826	-1.61266	-1.6408	-1.66655	-1.65176
0.597833	-1.59454	-1.60217	-1.60742	-1.5893	-1.53255	-1.61791	-1.63937	-1.66607	-1.6489
0.6045	-1.59502	-1.60265	-1.60217	-1.58787	-1.53685	-1.62363	-1.63746	-1.66655	-1.64556
0.611167	-1.59502	-1.60217	-1.59645	-1.58596	-1.54066	-1.62888	-1.63603	-1.6675	-1.64175
0.617833	-1.59645	-1.6017	-1.59168	-1.5831	-1.54543	-1.63507	-1.63412	-1.66798	-1.63841
0.6245	-1.59931	-1.60027	-1.58787	-1.58072	-1.55067	-1.64032	-1.63221	-1.66941	-1.63507
0.631167	-1.60313	-1.5974	-1.58405	-1.57976	-1.55544	-1.64413	-1.62983	-1.67036	-1.63221
0.637833	-1.60646	-1.59311	-1.58072	-1.57881	-1.56021	-1.64747	-1.62792	-1.67036	-1.62983
0.6445	-1.60933	-1.58978	-1.57833	-1.57833	-1.56641	-1.64938	-1.62601	-1.66845	-1.62649
0.651167	-1.61171	-1.58691	-1.57785	-1.57881	-1.57309	-1.64938	-1.62458	-1.66702	-1.62268
0.657833	-1.61314	-1.58405	-1.57785	-1.57976	-1.57928	-1.64843	-1.62315	-1.66655	-1.61886
0.6645	-1.61409	-1.58024	-1.57785	-1.58119	-1.58453	-1.64795	-1.62077	-1.66607	-1.61457
0.671167	-1.61505	-1.57642	-1.57833	-1.58262	-1.58978	-1.64747	-1.61886	-1.66559	-1.6098
0.677833	-1.616	-1.57166	-1.57928	-1.58453	-1.59502	-1.64652	-1.61695	-1.66512	-1.60408
0.6845	-1.61648	-1.56546	-1.57928	-1.58691	-1.60122	-1.64509	-1.616	-1.66512	-1.59836
0.691167	-1.61648	-1.55878	-1.57881	-1.58834	-1.60551	-1.64461	-1.616	-1.66464	-1.59264
0.697833	-1.61505	-1.55258	-1.57785	-1.59121	-1.60933	-1.64461	-1.61505	-1.66321	-1.58739
0.7045	-1.61219	-1.54734	-1.57642	-1.5955	-1.61457	-1.64509	-1.61362	-1.66082	-1.5831
0.711167	-1.60885	-1.54304	-1.57547	-1.60074	-1.62029	-1.64604	-1.61266	-1.65796	-1.57881
0.717833	-1.60456	-1.53971	-1.57595	-1.60646	-1.62554	-1.64986	-1.61123	-1.65462	-1.57452
0.7245	-1.59931	-1.53637	-1.57738	-1.61266	-1.63031	-1.65415	-1.60933	-1.65176	-1.5707
0.731167	-1.59359	-1.53208	-1.57928	-1.62077	-1.6346	-1.65796	-1.60694	-1.6489	-1.56832
0.737833	-1.58691	-1.5254	-1.58262	-1.62888	-1.63937	-1.65939	-1.60503	-1.64604	-1.56736
0.7445	-1.57928	-1.51873	-1.58882	-1.6346	-1.6427	-1.65987	-1.60313	-1.6427	-1.56593
0.751167	-1.57118	-1.51205	-1.5955	-1.63889	-1.64556	-1.65892	-1.60217	-1.63794	-1.56403
0.757833	-1.56307	-1.50633	-1.6017	-1.64175	-1.64747	-1.65606	-1.60217	-1.63221	-1.5626
0.7645	-1.55592	-1.50251	-1.60694	-1.64413	-1.64938	-1.65272	-1.60265	-1.62601	-1.56164
0.771167	-1.54877	-1.50013	-1.61362	-1.64604	-1.65176	-1.64986	-1.60217	-1.61934	-1.55926
0.777833	-1.54257	-1.49822	-1.62029	-1.6489	-1.65415	-1.6489	-1.60074	-1.61219	-1.55687
0.7845	-1.53637	-1.49632	-1.62601	-1.65272	-1.65653	-1.6489	-1.59931	-1.60456	-1.55497
0.791167	-1.53017	-1.49441	-1.63031	-1.65796	-1.65892	-1.64795	-1.59836	-1.59788	-1.55497
0.797833	-1.52397	-1.49393	-1.63603	-1.66321	-1.66225	-1.64795	-1.59597	-1.59168	-1.55544
0.8045	-1.5173	-1.49393	-1.64223	-1.66798	-1.66464	-1.64843	-1.59502	-1.58644	-1.55592
0.811167	-1.51157	-1.49345	-1.6489	-1.67179	-1.66702	-1.6489	-1.59454	-1.58119	-1.55783
0.817833	-1.50633	-1.49345	-1.65415	-1.67465	-1.66845	-1.64795	-1.59597	-1.5769	-1.56069
0.8245	-1.50156	-1.49441	-1.65749	-1.67751	-1.6675	-1.64556	-1.59693	-1.57309	-1.5645
0.831167	-1.49679	-1.49536	-1.6613	-1.68037	-1.66607	-1.64366	-1.5974	-1.56927	-1.56879
0.837833	-1.49345	-1.49679	-1.66416	-1.68228	-1.66464	-1.64175	-1.5974	-1.56641	-1.57452
0.8445	-1.48964	-1.49918	-1.66702	-1.68371	-1.66416	-1.63937	-1.59597	-1.56307	-1.58167
0.851167	-1.48487	-1.50394	-1.66988	-1.68562	-1.66512	-1.63841	-1.59264	-1.56021	-1.5893
0.857833	-1.48058	-1.50967	-1.67179	-1.688	-1.6675	-1.63889	-1.58787	-1.55783	-1.59502
0.8645	-1.4782	-1.51587	-1.67322	-1.69086	-1.67036	-1.64127	-1.58167	-1.55544	-1.59931
0.871167	-1.47724	-1.52159	-1.67465	-1.69277	-1.67227	-1.64223	-1.57595	-1.55401	-1.60408
0.877833	-1.47629	-1.52731	-1.67561	-1.69516	-1.6737	-1.64127	-1.57118	-1.55401	-1.60885
0.8845	-1.47533	-1.53208	-1.67704	-1.69754	-1.6737	-1.63889	-1.56546	-1.55497	-1.61409
0.891167	-1.47486	-1.53542	-1.67799	-1.69849	-1.67179	-1.63603	-1.56021	-1.55735	-1.61934
0.897833	-1.47486	-1.53971	-1.6799	-1.69849	-1.66893	-1.63269	-1.55544	-1.56021	-1.62554
0.9045	-1.47438	-1.54543	-1.68228	-1.69754	-1.66607	-1.62888	-1.55115	-1.56307	-1.63221
0.911167	-1.47438	-1.55115	-1.68514	-1.69659	-1.66464	-1.62554	-1.54781	-1.56593	-1.63698
0.917833	-1.47438	-1.5564	-1.68705	-1.69563	-1.66416	-1.62411	-1.544	-1.56784	-1.64127
0.9245	-1.47533	-1.56212	-1.688	-1.6942	-1.66368	-1.62506	-1.53971	-1.56927	-1.64509
0.931167	-1.4782	-1.56784	-1.68848	-1.69325	-1.66321	-1.62601	-1.53589	-1.56879	-1.64843
0.937833	-1.48201	-1.57309	-1.68848	-1.69182	-1.66273	-1.62601	-1.53351	-1.56832	-1.65129
0.9445	-1.48726	-1.57785	-1.68896	-1.68991	-1.6613	-1.62458	-1.53065	-1.56927	-1.65319
0.951167	-1.49393	-1.5831	-1.68943	-1.68753	-1.65939	-1.62268	-1.52636	-1.57166	-1.6551
0.957833	-1.50108	-1.58834	-1.68943	-1.68514	-1.65749	-1.62125	-1.52159	-1.57452	-1.65796
0.9645	-1.50776	-1.59264	-1.68991	-1.68324	-1.65606	-1.61934	-1.51539	-1.57785	-1.66035
0.971167	-1.51348	-1.59597	-1.68991	-1.68276	-1.65606	-1.61695	-1.50967	-1.58262	-1.66273
0.977833	-1.51682	-1.60027	-1.68896	-1.68324	-1.65653	-1.61457	-1.50442	-1.58739	-1.66416
0.9845	-1.52016	-1.60408	-1.6861	-1.68371	-1.65749	-1.61314	-1.50061	-1.59073	-1.66559
0.991167	-1.52254	-1.60694	-1.68324	-1.68514	-1.65796	-1.61171	-1.49822	-1.59454	-1.66702
0.997833	-1.52636	-1.61076	-1.68133	-1.688	-1.65749	-1.60933	-1.49632	-1.59931	-1.6675
1.0045	-1.53065	-1.61552	-1.67894	-1.69039	-1.65558	-1.60456	-1.49536	-1.60456	-1.66655
1.01117	-1.53637	-1.62029	-1.67656	-1.69182	-1.65367	-1.59931	-1.49441	-1.6098	-1.66559
1.01783	-1.54209	-1.62268	-1.67418	-1.69277	-1.65272	-1.59216	-1.49488	-1.61552	-1.66512
1.0245	-1.54734	-1.62411	-1.67227	-1.69373	-1.65272	-1.58453	-1.49584	-1.62315	-1.66464
1.03117	-1.55163	-1.62506	-1.66941	-1.6942	-1.65367	-1.57833	-1.4987	-1.63269	-1.66464
1.03783	-1.55449	-1.62506	-1.66368	-1.69277	-1.65558	-1.57166	-1.50299	-1.64366	-1.66416
1.0445	-1.55687	-1.62458	-1.65606	-1.69039	-1.65701	-1.56307	-1.50967	-1.65749	-1.66368
1.05117	-1.5583	-1.62411	-1.64509	-1.688	-1.65749	-1.55115	-1.5192	-1.67561	-1.66321
1.05783	-1.55973	-1.62411	-1.63174	-1.68753	-1.65606	-1.53637	-1.52969	-1.69659	-1.66273
1.0645	-1.56116	-1.62458	-1.61695	-1.68705	-1.65272	-1.5173	-1.53971	-1.72043	-1.66273
1.07117	-1.56212	-1.62506	-1.60217	-1.68705	-1.64843	-1.49536	-1.55067	-1.7457	-1.66416
1.07783	-1.56212	-1.62649	-1.58882	-1.68753	-1.64223	-1.472	-1.56212	-1.77097	-1.66607
1.0845	-1.56307	-1.62888	-1.57642	-1.68705	-1.63364	-1.45149	-1.57452	-1.79243	-1.66845
1.09117	-1.56403	-1.63317	-1.56498	-1.68514	-1.62077	-1.43814	-1.58596	-1.80769	-1.66988
1.09783	-1.5645	-1.63984	-1.55544	-1.68085	-1.6036	-1.43337	-1.59597	-1.81389	-1.67179
1.1045	-1.56355	-1.64747	-1.54781	-1.67322	-1.58072	-1.43814	-1.60456	-1.81103	-1.67227
1.11117	-1.56212	-1.6551	-1.54161	-1.66035	-1.55354	-1.45197	-1.61219	-1.80006	-1.66988
1.11783	-1.56212	-1.66035	-1.53685	-1.64032	-1.52349	-1.47343	-1.61934	-1.78337	-1.66416
1.1245	-1.56355	-1.66082	-1.53446	-1.61457	-1.49441	-1.4987	-1.62554	-1.76334	-1.65653
1.13117	-1.56593	-1.65415	-1.53446	-1.58358	-1.47104	-1.52349	-1.63031	-1.74236	-1.64652
1.13783	-1.57118	-1.6408	-1.53637	-1.54877	-1.45626	-1.54638	-1.63317	-1.72234	-1.63221
1.1445	-1.57833	-1.62268	-1.54018	-1.51443	-1.45292	-1.56498	-1.63507	-1.70422	-1.61457
1.15117	-1.58739	-1.6017	-1.54495	-1.48582	-1.46103	-1.57928	-1.63555	-1.68943	-1.59597
1.15783	-1.59645	-1.57928	-1.5502	-1.46627	-1.47867	-1.59121	-1.6346	-1.67608	-1.57785
1.1645	-1.6036	-1.55592	-1.5564	-1.45912	-1.50299	-1.60122	-1.63269	-1.66368	-1.56069
1.17117	-1.60742	-1.53494	-1.5645	-1.46389	-1.5316	-1.6098	-1.63126	-1.65272	-1.54448
1.17783	-1.60694	-1.5173	-1.57309	-1.48058	-1.56116	-1.61695	-1.63126	-1.64318	-1.53017
1.1845	-1.60217	-1.50299	-1.58119	-1.50442	-1.58739	-1.62268	-1.63174	-1.6346	-1.51777
1.19117	-1.59359	-1.49012	-1.5893	-1.53208	-1.60885	-1.62649	-1.63174	-1.62601	-1.50919
1.19783	-1.58167	-1.47915	-1.59788	-1.56069	-1.62554	-1.62935	-1.63174	-1.61695	-1.50347
1.2045	-1.56784	-1.47152	-1.60599	-1.58787	-1.63794	-1.63126	-1.63221	-1.60694	-1.49965
1.21117	-1.55258	-1.46532	-1.61314	-1.61266	-1.64556	-1.63269	-1.63317	-1.5955	-1.49679
1.21783	-1.5378	-1.46008	-1.62125	-1.63364	-1.65033	-1.63364	-1.63364	-1.58405	-1.49679
1.2245	-1.52397	-1.45578	-1.63078	-1.65129	-1.65367	-1.63364	-1.63317	-1.57261	-1.50061
1.23117	-1.51157	-1.45245	-1.6408	-1.66607	-1.65653	-1.63412	-1.63364	-1.56116	-1.50633
1.23783	-1.49918	-1.45197	-1.65081	-1.67894	-1.65939	-1.63555	-1.63412	-1.54972	-1.51253
1.2445	-1.48773	-1.45388	-1.66082	-1.68896	-1.66273	-1.63651	-1.63412	-1.54018	-1.52016
1.25117	-1.4782	-1.45817	-1.67131	-1.69611	-1.66607	-1.63746	-1.63412	-1.53208	-1.52922
1.25783	-1.47009	-1.46437	-1.68037	-1.70135	-1.66893	-1.63889	-1.63317	-1.52493	-1.53923
1.2645	-1.46341	-1.472	-1.688	-1.70612	-1.67131	-1.63937	-1.63174	-1.51873	-1.54829
1.27117	-1.45578	-1.4801	-1.6942	-1.71041	-1.67322	-1.64032	-1.62888	-1.513	-1.5564
1.27783	-1.44863	-1.48678	-1.69992	-1.71328	-1.67322	-1.63984	-1.62458	-1.50728	-1.56498
1.2845	-1.44339	-1.49298	-1.70469	-1.71471	-1.67227	-1.63841	-1.61886	-1.50299	-1.57404
1.29117	-1.43862	-1.49918	-1.70755	-1.71518	-1.67179	-1.63698	-1.61266	-1.49965	-1.58405
1.29783	-1.43337	-1.50585	-1.70803	-1.71471	-1.67131	-1.63603	-1.60646	-1.49727	-1.59359
1.3045	-1.42813	-1.513	-1.70708	-1.7128	-1.67036	-1.63555	-1.60027	-1.49488	-1.60313
1.31117	-1.42527	-1.52063	-1.70612	-1.70803	-1.66893	-1.63412	-1.59359	-1.49298	-1.61314
1.31783	-1.42622	-1.52874	-1.70517	-1.70326	-1.6675	-1.63126	-1.58596	-1.49393	-1.6222
1.3245	-1.4286	-1.53685	-1.70231	-1.69897	-1.66702	-1.62888	-1.57785	-1.49679	-1.63031
1.33117	-1.43194	-1.54448	-1.69849	-1.69516	-1.66559	-1.62649	-1.56879	-1.50156	-1.63746
1.33783	-1.43623	-1.55163	-1.69516	-1.6923	-1.66368	-1.62506	-1.5583	-1.50681	-1.64413
1.3445	-1.44339	-1.55926	-1.69277	-1.69039	-1.66225	-1.62649	-1.54686	-1.51396	-1.65129
1.35117	-1.45197	-1.56784	-1.68991	-1.68848	-1.66225	-1.62888	-1.53494	-1.52159	-1.65796
1.35783	-1.4596	-1.5769	-1.68705	-1.68514	-1.66368	-1.63269	-1.52349	-1.52969	-1.66368
1.3645	-1.4658	-1.58644	-1.68467	-1.68085	-1.66512	-1.63507	-1.513	-1.53685	-1.66893
1.37117	-1.472	-1.59597	-1.68467	-1.67561	-1.6675	-1.63698	-1.50299	-1.54304	-1.6737
1.37783	-1.47867	-1.60456	-1.68514	-1.67036	-1.66988	-1.63746	-1.49488	-1.54972	-1.67608
1.3845	-1.48296	-1.61076	-1.6861	-1.66416	-1.67131	-1.63507	-1.48773	-1.55497	-1.67704
1.39117	-1.48439	-1.61362	-1.6861	-1.65844	-1.67227	-1.63031	-1.48058	-1.55926	-1.67704
1.39783	-1.48487	-1.61457	-1.68371	-1.65367	-1.67227	-1.62554	-1.47247	-1.56307	-1.67608
1.4045	-1.48535	-1.61409	-1.68037	-1.64938	-1.67131	-1.61982	-1.46437	-1.56641	-1.67418
1.41117	-1.48726	-1.61171	-1.67656	-1.64461	-1.67036	-1.61362	-1.45674	-1.56975	-1.67084
1.41783	-1.48964	-1.60933	-1.67322	-1.63841	-1.66845	-1.60551	-1.45006	-1.57166	-1.66655
1.4245	-1.49345	-1.60789	-1.67036	-1.63269	-1.66559	-1.59788	-1.44577	-1.57452	-1.66082
1.43117	-1.49918	-1.60789	-1.67036	-1.62745	-1.66368	-1.59025	-1.44529	-1.57833	-1.6551
1.43783	-1.50442	-1.60885	-1.67322	-1.62315	-1.66273	-1.58405	-1.44815	-1.58262	-1.65129
1.4445	-1.50681	-1.60933	-1.67799	-1.62029	-1.6613	-1.57833	-1.45245	-1.58644	-1.6489
1.45117	-1.50347	-1.60742	-1.6818	-1.61648	-1.65939	-1.57213	-1.45578	-1.58739	-1.64652
1.45783	-1.49441	-1.60074	-1.68419	-1.61171	-1.65653	-1.56403	-1.45531	-1.58262	-1.64223
1.4645	-1.47963	-1.58834	-1.68467	-1.60313	-1.65272	-1.55163	-1.45197	-1.57118	-1.63651
1.47117	-1.45912	-1.57022	-1.68085	-1.59073	-1.64556	-1.53399	-1.44482	-1.55163	-1.6284
1.47783	-1.43433	-1.54734	-1.67322	-1.57404	-1.63364	-1.50967	-1.43385	-1.52349	-1.61695
1.4845	-1.40429	-1.51968	-1.66273	-1.5521	-1.61839	-1.47963	-1.41859	-1.4863	-1.60122
1.49117	-1.36995	-1.48869	-1.64843	-1.5254	-1.60074	-1.44386	-1.39809	-1.43957	-1.58215
1.49783	-1.33228	-1.45149	-1.62506	-1.49059	-1.57928	-1.40047	-1.36662	-1.37901	-1.55735
1.5045	-1.28984	-1.39809	-1.58405	-1.44196	-1.54734	-1.34134	-1.31035	-1.29795	-1.52016
1.51117	-1.2393	-1.30987	-1.50728	-1.36662	-1.49488	-1.2517	-1.20831	-1.18303	-1.45817
1.51783	-1.17016	-1.15681	-1.36614	-1.24025	-1.40619	-1.10579	-1.02663	-1.01089	-1.34993
1.5245	-1.06907	-0.910759	-1.12534	-1.02806	-1.2517	-0.867844	-0.730991	-0.751019	-1.1611
1.53117	-0.924587	-0.564575	-0.767231	-0.696182	-0.992298	-0.505447	-0.310421	-0.378609	-0.852108
1.53783	-0.742436	-0.147343	-0.310898	-0.241756	-0.600338	-0.0195503	0.203133	0.0991821	-0.406742
1.5445	-0.542164	0.282764	0.187397	0.294209	-0.0867844	0.543118	0.737667	0.634193	0.142574
1.55117	-0.354767	0.655174	0.649929	0.831604	0.488281	1.09768	1.20401	1.14679	0.720978
1.55783	-0.221252	0.895977	0.992298	1.2784	1.03617	1.55067	1.5111	1.54686	1.23072
1.5645	-0.199795	0.927448	1.13106	1.54591	1.46151	1.8096	1.57022	1.74618	1.57261
1.57117	-0.380516	0.662327	0.977993	1.54829	1.67322	1.78528	1.28889	1.65844	1.64986
1.57783	-0.876903	0.00858307	0.442505	1.19877	1.58167	1.38712	0.577927	1.19305	1.36232
1.5845	-1.7724	-1.09339	-0.546455	0.418186	1.09625	0.535965	-0.612736	0.274181	0.620842
1.59117	-3.04651	-2.61784	-1.98746	-0.828743	0.145912	-0.795364	-2.23827	-1.11771	-0.615597
1.59783	-4.52662	-4.40979	-3.75557	-2.48814	-1.27649	-2.53153	-4.13084	-2.89583	-2.28977
1.6045	-5.91469	-6.18315	-5.59235	-4.38643	-3.07083	-4.47273	-5.99575	-4.84848	-4.22287
1.61117	-6.8469	-7.55453	-7.13539	-6.22129	-5.01013	-6.29616	-7.44295	-6.64806	-6.11544
1.61783	-6.99711	-8.14915	-8.00848	-7.57027	-6.74772	-7.59792	-8.09336	-7.88641	-7.57694
1.6245	-6.20508	-7.80582	-7.9937	-8.02135	-7.86781	-8.02183	-7.78866	-8.21209	-8.22067
1.63117	-4.57573	-6.70767	-7.18307	-7.46775	-8.04806	-7.48825	-6.71768	-7.56311	-7.88116
1.63783	-2.46954	-5.23901	-5.90277	-6.25753	-7.29942	-6.2809	-5.26953	-6.23608	-6.75678
1.6445	-0.369072	-3.685	-4.46606	-4.94671	-5.9824	-4.82941	-3.73268	-4.65965	-5.26476
1.65117	1.30033	-2.10571	-2.99549	-3.85189	-4.52471	-3.37362	-2.17009	-3.07035	-3.71933
1.65783	2.316	-0.49448	-1.48964	-2.88153	-3.09515	-1.89257	-0.586986	-1.46294	-2.16627
1.6645	2.70081	1.05524	0.0267029	-1.77145	-1.62077	-0.33617	0.915527	0.169754	-0.552177
1.67117	2.65408	2.36654	1.44768	-0.339985	-0.0476837	1.20068	2.16198	1.6942	1.06621
1.67783	2.42615	3.29113	2.60019	1.39809	1.513	2.51293	3.01266	2.90251	2.50196
1.6845	2.20776	3.79229	3.3226	3.21531	2.85101	3.42846	3.44181	3.67117	3.55625
1.69117	2.07806	3.95775	3.57628	4.72975	3.79753	3.90005	3.5367	4.01688	4.14181
1.69783	2.00558	3.98159	3.51477	5.58996	4.29392	3.99876	3.47996	4.05502	4.31013
1.7045	1.90067	4.12846	3.43037	5.70869	4.40025	3.89385	3.51143	3.96442	4.22859
1.71117	1.68276	4.6649	3.63302	5.35679	4.29726	3.84474	3.87383	3.99494	4.14705
1.71783	1.33944	5.71871	4.32825	5.03349	4.28343	4.14371	4.68063	4.4117	4.35734
1.7245	0.923157	7.11298	5.47743	5.20372	4.67396	4.92764	5.76019	5.30624	5.05352
1.73117	0.511169	8.37326	6.73676	6.00195	5.57375	5.98335	6.66618	6.41346	6.12354
1.73783	0.156403	9.00173	7.59935	7.10058	6.69956	6.80304	6.95181	7.21455	7.1125
1.7445	-0.123501	8.79097	7.70473	7.90596	7.50494	6.93464	6.47163	7.29465	7.50828
1.75117	-0.336647	7.89118	7.0405	7.95889	7.56121	6.28185	5.42355	6.60992	7.09677
1.75783	-0.499725	6.62661	5.87845	7.19643	6.82116	5.09453	4.14944	5.43118	6.0463
1.7645	-0.628948	5.28526	4.5557	5.88751	5.56326	3.73459	2.92206	4.10128	4.70972
1.77117	-0.738144	4.0307	3.30734	4.39882	4.14658	2.46763	1.87111	2.86055	3.38936
1.77783	-0.835896	2.92349	2.23494	3.01218	2.82526	1.41478	1.01852	1.81055	2.24495
1.7845	-0.926495	1.96743	1.34993	1.86968	1.71375	0.58651	0.333309	0.960827	1.31464
1.79117	-1.01042	1.14965	0.626564	0.990391	0.823498	-0.0557899	-0.220776	0.277042	0.572205
1.79783	-1.0891	0.460148	0.0376701	0.32711	0.118732	-0.555038	-0.668526	-0.277519	-0.0224113
1.8045	-1.16444	-0.103951	-0.434876	-0.178337	-0.441074	-0.939846	-1.02043	-0.724316	-0.498295
1.81117	-1.24073	-0.546932	-0.799656	-0.567913	-0.880718	-1.22547	-1.28222	-1.07527	-0.870705
1.81783	-1.32322	-0.87595	-1.0643	-0.865936	-1.21403	-1.42145	-1.46008	-1.33562	-1.14918
1.8245	-1.41621	-1.10388	-1.24168	-1.08814	-1.45149	-1.5378	-1.56212	-1.513	-1.3423
1.83117	-1.52206	-1.24502	-1.34659	-1.24645	-1.60217	-1.58501	-1.60122	-1.61791	-1.45817
1.83783	-1.63937	-1.31798	-1.39523	-1.35231	-1.67942	-1.57785	-1.5955	-1.66273	-1.51157
1.8445	-1.7643	-1.3442	-1.40572	-1.41525	-1.69945	-1.53589	-1.56069	-1.66416	-1.51825
1.85117	-1.89114	-1.34373	-1.39427	-1.44815	-1.67894	-1.4782	-1.51443	-1.63841	-1.49679
1.85783	-2.01559	-1.33085	-1.37424	-1.46294	-1.63746	-1.41811	-1.46723	-1.60027	-1.46294
1.8645	-2.13432	-1.31559	-1.35326	-1.47152	-1.58978	-1.36566	-1.4267	-1.56021	-1.4286
1.87117	-2.24161	-1.30224	-1.33514	-1.4782	-1.54495	-1.32561	-1.39618	-1.5254	-1.39999
1.87783	-2.32649	-1.29175	-1.32275	-1.48439	-1.50728	-1.29795	-1.3752	-1.49918	-1.37854
1.8845	-2.37703	-1.28555	-1.31512	-1.49012	-1.47676	-1.28031	-1.36232	-1.4801	-1.36566
1.89117	-2.38657	-1.28174	-1.31226	-1.49632	-1.45435	-1.26982	-1.35517	-1.4677	-1.35899
1.89783	-2.35176	-1.27888	-1.31178	-1.50204	-1.43766	-1.2641	-1.35231	-1.45864	-1.3566
1.9045	-2.27594	-1.27554	-1.31273	-1.5049	-1.42384	-1.26123	-1.35136	-1.45197	-1.3566
1.91117	-2.16818	-1.27268	-1.31321	-1.50537	-1.41048	-1.2579	-1.35088	-1.44672	-1.35851
1.91783	-2.04563	-1.26982	-1.31226	-1.50394	-1.39523	-1.25408	-1.34897	-1.441	-1.36089
1.9245	-1.92499	-1.26457	-1.30844	-1.50061	-1.37758	-1.24598	-1.34563	-1.43433	-1.36185
1.93117	-1.81818	-1.25647	-1.29986	-1.49584	-1.35565	-1.23215	-1.33944	-1.42622	-1.35851
1.93783	-1.72806	-1.24645	-1.28841	-1.48821	-1.33038	-1.2126	-1.33085	-1.41716	-1.35136
1.9445	-1.63412	-1.23501	-1.27363	-1.47676	-1.30177	-1.18732	-1.31845	-1.40524	-1.33991
1.95117	-1.51777	-1.22118	-1.25647	-1.46103	-1.27029	-1.15776	-1.30129	-1.3895	-1.32322
1.95783	-1.38855	-1.20401	-1.23787	-1.43957	-1.23549	-1.12295	-1.27888	-1.369	-1.30033
1.9645	-1.27459	-1.18542	-1.21593	-1.41382	-1.19829	-1.08433	-1.25027	-1.3442	-1.27268
1.97117	-1.19162	-1.16634	-1.19209	-1.38283	-1.15776	-1.04237	-1.2126	-1.31464	-1.23835
1.97783	-1.08004	-1.14536	-1.16539	-1.3485	-1.11055	-0.993729	-1.16348	-1.27792	-1.19543
1.9845	-0.85783	-1.12152	-1.13583	-1.3113	-1.05619	-0.935554	-1.09673	-1.23119	-1.14059
1.99117	-0.459671	-1.09196	-1.10102	-1.27077	-0.992298	-0.860214	-0.987053	-1.16777	-1.06716
1.99783	0.133038	-1.02997	-1.05286	-1.22547	-0.915527	-0.754356	-0.69046	-1.04761	-0.946999
2.0045	0.916004	-0.869274	-0.934601	-1.17397	-0.805378	-0.556946	0.0958443	-0.683308	-0.640869
2.01117	1.88112	-0.531673	-0.603676	-1.11103	-0.564098	-0.0939369	1.66798	0.256538	0.150204
2.01783	2.92873	0.014782	0.10252	-1.00374	-0.0038147	0.853539	4.04882	2.04897	1.72234
2.0245	3.86143	0.713348	1.24502	-0.787258	1.04904	2.39849	6.88314	4.6382	4.11844
2.03117	4.45604	1.45817	2.69604	-0.395775	2.6021	4.38976	9.67264	7.617	7.00474
2.03783	4.60291	2.12288	4.22764	0.187397	4.44174	6.50406	11.9133	10.4752	9.88817
2.0445	4.33159	2.57587	5.58233	0.902176	6.27947	8.38804	13.1254	12.6877	12.2538
2.05117	3.73077	2.70557	6.48785	1.65939	7.80344	9.67693	12.9681	13.7591	13.6042
2.05783	2.90155	2.47574	6.71291	2.35224	8.69274	10.0565	11.4803	13.3724	13.5736
2.0645	1.98126	1.97315	6.18792	2.85673	8.69751	9.39655	9.15766	11.6606	12.1636
2.07117	1.13583	1.34277	5.10406	3.05367	7.81822	7.91454	6.62708	9.1877	9.8443
2.07783	0.484467	0.716209	3.77369	2.88868	6.35529	6.04534	4.35209	6.58083	7.24602
2.0845	0.0443459	0.175476	2.46763	2.43044	4.69065	4.18901	2.5568	4.27246	4.85563
2.09117	-0.24271	-0.237465	1.35279	1.81055	3.11661	2.59447	1.3051	2.47192	2.92921
2.09783	-0.436783	-0.514984	0.514984	1.15013	1.80435	1.38044	0.54121	1.23835	1.5583
2.1045	-0.575066	-0.685692	-0.0314713	0.53215	0.845432	0.571728	0.123978	0.498772	0.706673
2.11117	-0.678062	-0.789642	-0.346661	0.0219345	0.238895	0.099659	-0.0987053	0.0948906	0.236034
2.11783	-0.760555	-0.857353	-0.520229	-0.339031	-0.102043	-0.156879	-0.226021	-0.125885	-0.0138283
2.1245	-0.83065	-0.90313	-0.619412	-0.557899	-0.288963	-0.301361	-0.304222	-0.255108	-0.153542
2.13117	-0.892162	-0.929832	-0.678062	-0.677109	-0.397205	-0.387669	-0.348091	-0.33474	-0.235081
2.13783	-0.946522	-0.934124	-0.706196	-0.738144	-0.461101	-0.435829	-0.361443	-0.379562	-0.277996
2.1445	-0.994205	-0.912666	-0.707626	-0.761986	-0.492096	-0.450134	-0.3438	-0.392437	-0.286102
2.15117	-1.0376	-0.863075	-0.680447	-0.75388	-0.491619	-0.431538	-0.294208	-0.372887	-0.257969
2.15783	-1.07479	-0.786781	-0.62561	-0.718117	-0.458717	-0.380993	-0.216007	-0.321388	-0.193596
2.1645	-1.10817	-0.687599	-0.547409	-0.657082	-0.393391	-0.302315	-0.114918	-0.242233	-0.0953674
2.17117	-1.13821	-0.574112	-0.452042	-0.57745	-0.299454	-0.202656	-0.0019073	-0.143528	0.0305176
2.17783	-1.16539	-0.45824	-0.348091	-0.48542	-0.186443	-0.0915527	0.11158	-0.0348091	0.173569
2.1845	-1.18971	-0.35429	-0.247002	-0.389099	-0.0658035	0.0195503	0.212669	0.0715256	0.320435
2.19117	-1.21164	-0.271797	-0.158787	-0.297546	0.0505447	0.12064	0.288963	0.164032	0.456333
2.19783	-1.23119	-0.217438	-0.0934601	-0.218391	0.151157	0.202656	0.332832	0.23222	0.566006
2.2045	-1.24884	-0.19598	-0.0557899	-0.156879	0.225067	0.260353	0.340939	0.269413	0.641346
2.21117	-1.26457	-0.207901	-0.0500679	-0.115871	0.267029	0.288486	0.314713	0.273228	0.676632
2.21783	-1.2784	-0.251293	-0.0762939	-0.0991821	0.273228	0.285625	0.256062	0.245571	0.670433
2.2245	-1.28984	-0.319958	-0.1297	-0.107765	0.245571	0.254154	0.171661	0.189781	0.623226
2.23117	-1.29795	-0.405788	-0.204086	-0.141621	0.185966	0.198364	0.0691414	0.110626	0.54121
2.23783	-1.30129	-0.500202	-0.291347	-0.198841	0.100136	0.123978	-0.041008	0.0162125	0.434399
2.2445	-1.297	-0.596046	-0.383377	-0.275135	-0.0033379	0.0376701	-0.15068	-0.084877	0.312805
2.25117	-1.2846	-0.685215	-0.471592	-0.364304	-0.116348	-0.0510216	-0.252247	-0.184536	0.187397
2.25783	-1.26457	-0.762939	-0.55027	-0.461101	-0.227451	-0.133991	-0.341415	-0.274181	0.0677109
2.2645	-1.24073	-0.827313	-0.61655	-0.558376	-0.329971	-0.20504	-0.415802	-0.349522	-0.0371933
2.27117	-1.21737	-0.879288	-0.669956	-0.650883	-0.417709	-0.26226	-0.475884	-0.409126	-0.123024
2.27783	-1.2002	-0.92268	-0.711441	-0.732899	-0.486851	-0.305176	-0.525951	-0.454903	-0.190258
2.2845	-1.19305	-0.960827	-0.743866	-0.804424	-0.538826	-0.337124	-0.56982	-0.489235	-0.24128
2.29117	-1.19781	-0.999451	-0.771046	-0.864029	-0.575066	-0.361443	-0.610828	-0.516891	-0.281334
2.29783	-1.21498	-1.03998	-0.797749	-0.912666	-0.600338	-0.382423	-0.65279	-0.542641	-0.314713
2.3045	-1.23978	-1.08147	-0.825405	-0.950337	-0.619888	-0.404358	-0.696182	-0.569344	-0.34523
2.31117	-1.26743	-1.12247	-0.853538	-0.9799	-0.638962	-0.42963	-0.739574	-0.598431	-0.376225
2.31783	-1.29461	-1.16301	-0.881672	-1.0047	-0.658512	-0.457287	-0.779629	-0.628948	-0.406265
2.3245	-1.31845	-1.20068	-0.908852	-1.02758	-0.678062	-0.484467	-0.813961	-0.658035	-0.433922
2.33117	-1.33801	-1.2331	-0.933647	-1.0519	-0.696659	-0.507832	-0.840664	-0.683785	-0.459194
2.33783	-1.35183	-1.25933	-0.953198	-1.07622	-0.713348	-0.527382	-0.858784	-0.703812	-0.479698
2.3445	-1.36185	-1.27935	-0.967979	-1.10006	-0.725746	-0.542641	-0.868321	-0.71907	-0.49448
2.35117	-1.369	-1.29461	-0.977516	-1.12343	-0.731945	-0.551701	-0.870705	-0.728607	-0.502586
2.35783	-1.37424	-1.30606	-0.982285	-1.14441	-0.731468	-0.554562	-0.867844	-0.732899	-0.504017
2.3645	-1.37901	-1.31416	-0.982761	-1.16158	-0.725269	-0.553608	-0.862598	-0.731945	-0.499725
2.37117	-1.38378	-1.31941	-0.979424	-1.17397	-0.714302	-0.550747	-0.854969	-0.728607	-0.490189
2.37783	-1.38903	-1.3237	-0.972748	-1.18113	-0.700474	-0.546455	-0.844955	-0.722885	-0.476837
2.3845	-1.39427	-1.32751	-0.962734	-1.18542	-0.683785	-0.53978	-0.833035	-0.715733	-0.459194
2.39117	-1.39952	-1.33085	-0.950337	-1.18542	-0.665665	-0.529766	-0.819206	-0.706196	-0.438213
2.39783	-1.40476	-1.33371	-0.935554	-1.18113	-0.648498	-0.516891	-0.803471	-0.695229	-0.415325
2.4045	-1.40953	-1.33514	-0.919342	-1.17445	-0.632763	-0.502109	-0.786304	-0.683308	-0.391006
2.41117	-1.41335	-1.3361	-0.901222	-1.16634	-0.617981	-0.486374	-0.766754	-0.669479	-0.364304
2.41783	-1.41621	-1.3361	-0.880718	-1.15728	-0.603676	-0.466824	-0.74482	-0.654221	-0.335693
2.4245	-1.4205	-1.3361	-0.857353	-1.14775	-0.588894	-0.442505	-0.720024	-0.637054	-0.306129
2.43117	-1.42479	-1.33562	-0.831604	-1.13773	-0.573158	-0.415325	-0.692844	-0.617027	-0.275135
2.43783	-1.42908	-1.33514	-0.80204	-1.1282	-0.557423	-0.387192	-0.665188	-0.594139	-0.241756
2.4445	-1.43337	-1.33371	-0.769138	-1.11866	-0.53978	-0.356674	-0.63467	-0.568867	-0.203609
2.45117	-1.43719	-1.33181	-0.731945	-1.10769	-0.520229	-0.322342	-0.602245	-0.540733	-0.161171
2.45783	-1.43957	-1.3299	-0.691414	-1.09625	-0.499248	-0.285149	-0.567436	-0.509262	-0.114441
2.4645	-1.43909	-1.32704	-0.648498	-1.08624	-0.476837	-0.245571	-0.53072	-0.473976	-0.061512
2.47117	-1.4348	-1.32275	-0.603199	-1.07813	-0.452995	-0.203609	-0.491619	-0.435829	-0.0023842
2.47783	-1.4286	-1.3175	-0.556946	-1.07098	-0.427246	-0.156879	-0.449181	-0.393867	0.061512
2.4845	-1.41954	-1.31083	-0.509739	-1.06525	-0.400543	-0.105858	-0.404358	-0.349522	0.128269
2.49117	-1.4081	-1.3032	-0.461101	-1.06192	-0.37241	-0.0505447	-0.356197	-0.302792	0.199795
2.49783	-1.39618	-1.29366	-0.411511	-1.06001	-0.344753	0.00905991	-0.303745	-0.253677	0.275612
2.5045	-1.38712	-1.28317	-0.360966	-1.0581	-0.315666	0.0734329	-0.246525	-0.200748	0.356674
2.51117	-1.38044	-1.27077	-0.308037	-1.05619	-0.284672	0.142574	-0.184059	-0.143051	0.443459
2.51783	-1.37711	-1.25456	-0.252724	-1.05476	-0.249863	0.216007	-0.116825	-0.0801086	0.537872
2.5245	-1.37711	-1.23453	-0.195026	-1.05286	-0.211239	0.292778	-0.0419617	-0.0100136	0.6423
2.53117	-1.38092	-1.21164	-0.135899	-1.05047	-0.1688	0.374794	0.0386238	0.0696182	0.758648
2.53783	-1.38712	-1.18732	-0.0758171	-1.04713	-0.12207	0.462055	0.124931	0.159264	0.888348
2.5445	-1.3957	-1.16205	-0.0143051	-1.04141	-0.0715256	0.554562	0.216484	0.258446	1.03045
2.55117	-1.40476	-1.1363	0.0491142	-1.03474	-0.0166893	0.652313	0.313759	0.365734	1.18589
2.55783	-1.41287	-1.11151	0.114441	-1.0252	0.0419617	0.757217	0.417233	0.481129	1.35469
2.5645	-1.41907	-1.08862	0.184059	-1.01376	0.104427	0.867844	0.524521	0.601768	1.53542
2.57117	-1.42241	-1.06573	0.255585	-0.999451	0.169754	0.983238	0.637054	0.727177	1.7271
2.57783	-1.42193	-1.04237	0.328064	-0.981808	0.239372	1.10245	0.754833	0.8564	1.92785
2.5845	-1.41907	-1.01757	0.39959	-0.96035	0.314713	1.22499	0.881195	0.989914	2.13528
2.59117	-1.41287	-0.992298	0.470161	-0.934601	0.393391	1.3504	1.01662	1.12867	2.34556
2.59783	-1.40476	-0.964642	0.537395	-0.905037	0.472546	1.47676	1.16348	1.27411	2.5568
2.6045	-1.3957	-0.935554	0.600815	-0.872135	0.552177	1.6017	1.32322	1.42717	2.76852
2.61117	-1.38474	-0.90456	0.660419	-0.836372	0.631809	1.72567	1.49584	1.59121	2.97976
2.61783	-1.37091	-0.870705	0.718594	-0.799656	0.711441	1.84631	1.6818	1.76716	3.19242
2.6245	-1.35374	-0.835419	0.774384	-0.762463	0.789165	1.96362	1.87969	1.95646	3.40796
2.63117	-1.33371	-0.797272	0.827789	-0.724792	0.866413	2.0771	2.08855	2.15912	3.62921
2.63783	-1.31083	-0.756264	0.878811	-0.685215	0.944614	2.18868	2.30646	2.37799	3.85761
2.6445	-1.28412	-0.711441	0.929832	-0.643253	1.02377	2.30074	2.53391	2.61259	4.0946
2.65117	-1.2536	-0.662804	0.984192	-0.597	1.10435	2.4128	2.7709	2.86293	4.33969
2.65783	-1.21927	-0.609875	1.04189	-0.545502	1.18828	2.52533	3.01695	3.1271	4.59099
2.6645	-1.1797	-0.55027	1.10531	-0.486374	1.27649	2.63834	3.27206	3.40366	4.84753
2.67117	-1.13249	-0.483036	1.1797	-0.418186	1.36948	2.75564	3.53718	3.69549	5.10931
2.67783	-1.07479	-0.409126	1.26982	-0.339031	1.47057	2.87914	3.8147	4.00209	5.37395
2.6845	-1.00422	-0.32568	1.37997	-0.245094	1.58262	3.01361	4.107	4.32396	5.64194
2.69117	-0.917435	-0.227928	1.51443	-0.132561	1.70898	3.16381	4.41599	4.66204	5.91469
2.69783	-0.811577	-0.112057	1.68228	0	1.85394	3.33691	4.74501	5.02014	6.19364
2.7045	-0.684738	0.0219345	1.89161	0.156879	2.02084	3.53909	5.09501	5.40209	6.48355
2.71117	-0.537396	0.174046	2.14863	0.338554	2.21491	3.77226	5.46455	5.80835	6.78825
2.71783	-0.37241	0.345707	2.45857	0.545979	2.43902	4.03929	5.85222	6.23798	7.11155
2.7245	-0.194073	0.535488	2.82764	0.776291	2.69461	4.34208	6.25515	6.68955	7.45583
2.73117	-0.0061989	0.738144	3.26014	1.02615	2.98071	4.68111	6.67143	7.16209	7.82251
2.73783	0.188351	0.948429	3.76129	1.28937	3.29494	5.0559	7.09915	7.65181	8.21447
2.7445	0.385761	1.16348	4.3416	1.56116	3.63827	5.46885	7.54166	8.15392	8.63123
2.75117	0.585079	1.38187	5.01633	1.83582	4.01211	5.92661	8.00848	8.6689	9.07564
2.75783	0.787258	1.6036	5.80883	2.11048	4.42266	6.44255	8.51727	9.19914	9.55677
2.7645	0.995159	1.83058	6.75297	2.38276	4.87995	7.03621	9.09519	9.75466	10.0918
2.77117	1.21307	2.0709	7.89595	2.65551	5.40161	7.73668	9.78136	10.3545	10.7055
2.77783	1.44339	2.33984	9.30119	2.93589	6.0153	8.58974	10.6373	11.0297	11.4369
2.7845	1.6923	2.66123	11.0526	3.23343	6.76155	9.65929	11.7507	11.8341	12.3467
2.79117	1.96314	3.07178	13.2594	3.56388	7.69758	11.0373	13.2494	12.8469	13.5298
2.79783	2.25496	3.62539	16.0613	3.94869	8.90589	12.8512	15.326	14.194	15.1258
2.8045	2.56348	4.40407	19.6357	4.42648	10.5114	15.2845	18.2691	16.067	17.3469
2.81117	2.87628	5.5337	24.2009	5.05495	12.6963	18.6043	22.5043	18.764	20.5173
2.81783	3.17574	7.20406	30.0117	5.92613	15.7304	23.1833	28.6498	22.7432	25.1265
2.8245	3.43561	9.69839	37.3392	7.18975	20.01	29.5372	37.5767	28.7027	31.9033
2.83117	3.64256	13.4268	46.4249	9.09328	26.1035	38.352	50.4408	37.6749	41.8887
2.83783	3.82757	18.9414	57.384	12.0482	34.7943	50.4947	68.6111	51.1079	56.4866
2.8445	4.00496	26.8908	70.0498	16.7184	47.0858	66.937	93.3628	70.8423	77.3802
2.85117	4.04978	37.724	83.8223	24.1508	64.0864	88.4995	125.037	98.7606	106.11
2.85783	3.7961	50.7941	97.7511	35.8458	86.6208	115.246	161.182	135.538	142.74
2.8645	3.21722	63.4599	110.255	53.3547	114.35	145.297	194.785	177.701	183.061
2.87117	2.46716	72.0448	118.49	76.3226	144.336	173.568	216.383	215.702	217.424
2.87783	1.66941	74.0681	119.428	100.216	170.266	192.686	219.394	238.133	235.389
2.8845	0.861168	69.3421	111.784	118.044	184.795	196.759	203.226	238.502	231.825
2.89117	0.171661	59.062	96.9915	124.774	183.569	184.389	171.65	217.578	208.325
2.89783	-0.225544	44.9786	77.7192	119.59	166.949	158.34	130.302	179.962	169.686
2.9045	-0.286579	29.9749	56.5925	103.956	138.503	123.393	87.0996	132.18	122.644
2.91117	-0.155926	17.4713	36.757	80.2913	103.33	85.8173	50.9081	84.2209	77.0402
2.91783	0.00953674	9.41563	21.2507	53.7124	68.193	52.8092	27.0009	46.4482	42.2502
2.9245	0.157356	5.29814	11.4412	30.9052	39.8288	29.4175	14.4997	23.5209	21.6966
2.93117	0.287533	3.36695	6.2871	15.9831	21.5135	16.0737	8.8892	12.5675	12.002
2.93783	0.401497	2.33078	3.77035	8.26597	11.8732	9.60827	6.34098	7.87735	7.83014
2.9445	0.495911	1.65224	2.49434	4.63676	7.30276	6.57511	5.01204	5.67627	5.89037
2.95117	0.564575	1.15204	1.79243	2.80428	5.04017	5.01871	4.21238	4.43506	4.85897
2.95783	0.602245	0.761509	1.37186	1.77383	3.77893	4.11701	3.67975	3.63064	4.24957
2.9645	0.606537	0.450134	1.10149	1.15871	2.99597	3.53527	3.29351	3.06463	3.85046
2.97117	0.577927	0.198841	0.916004	0.782013	2.46906	3.12042	2.98738	2.64597	3.55148
2.97783	0.516891	-0.0042915	0.78249	0.546932	2.08998	2.79665	2.72417	2.32553	3.29304
2.9845	0.427246	-0.1688	0.681877	0.398636	1.80101	2.5239	2.48528	2.07663	3.04747
2.99117	0.312805	-0.301838	0.602245	0.305176	1.57213	2.28691	2.26402	1.87969	2.80476
2.99783	0.180721	-0.408173	0.535011	0.246525	1.38855	2.08187	2.06137	1.72329	2.56681
3.0045	0.0371933	-0.492573	0.472546	0.210285	1.24502	1.91021	1.8816	1.59979	2.34175
3.01117	-0.112534	-0.55933	0.409603	0.189781	1.13869	1.7724	1.72853	1.50299	2.13814
3.01783	-0.262737	-0.614643	0.342369	0.178814	1.06478	1.66798	1.60599	1.42622	1.96171
3.0245	-0.408173	-0.659943	0.26989	0.174522	1.01852	1.59168	1.51348	1.36518	1.81341
3.03117	-0.544548	-0.697136	0.193596	0.174999	0.993252	1.53732	1.44863	1.3175	1.69516
3.03783	-0.669479	-0.728607	0.115871	0.178814	0.980854	1.49536	1.40333	1.27935	1.60503
3.0445	-0.784397	-0.757217	0.0386238	0.18549	0.971317	1.46008	1.37281	1.24884	1.53732
3.05117	-0.892639	-0.784874	-0.0352859	0.19455	0.955105	1.42431	1.35279	1.22404	1.48726
3.05783	-1.00517	-0.810146	-0.104427	0.205517	0.925541	1.38474	1.33801	1.20497	1.45102
3.0645	-1.14298	-0.834465	-0.169277	0.220776	0.880718	1.3423	1.32465	1.18971	1.42527
3.07117	-1.32227	-0.862598	-0.23222	0.241756	0.822067	1.29843	1.30892	1.17636	1.40476
3.07783	-1.52969	-0.904083	-0.300884	0.270844	0.752449	1.25456	1.28603	1.15967	1.38474
3.0845	-1.71518	-0.96941	-0.38147	0.30899	0.674248	1.21117	1.25456	1.13249	1.35756
3.09117	-1.81627	-1.0581	-0.473023	0.355244	0.588417	1.17254	1.23167	1.08957	1.32179
3.09783	-1.79243	-1.14965	-0.550747	0.413418	0.504494	1.16491	1.26934	1.04666	1.29604
3.1045	-1.63126	-1.20306	-0.562668	0.504017	0.453949	1.25456	1.46818	1.05238	1.33753
3.11117	-1.34706	-1.17207	-0.440121	0.682354	0.499248	1.56975	1.9908	1.194	1.54877
3.11783	-0.983238	-1.01757	-0.100613	1.05715	0.745773	2.33221	3.1023	1.60551	2.09284
3.1245	-0.610352	-0.70858	0.566959	1.81055	1.35517	3.90673	5.23043	2.50387	3.25155
3.13117	-0.299931	-0.218391	1.719	3.20959	2.57301	6.83022	8.97932	4.27008	5.51176
3.13783	-0.0905991	0.475883	3.55339	5.58662	4.74644	11.724	15.0008	7.52354	9.60875
3.1445	0.0166893	1.39856	6.27422	9.24969	8.2612	19.042	23.6945	13.1006	16.4123
3.15117	0.0414848	2.58541	10.0269	14.3332	13.3972	28.7547	34.8606	21.8191	26.5713
3.15783	0.00858307	4.06742	14.833	20.6656	20.1411	40.1692	47.5168	34.0405	40.0376
3.1645	-0.061512	5.84078	20.5431	27.7534	28.0814	52.0334	60.0352	49.2229	55.7489
3.17117	-0.155449	7.83539	26.8459	34.9026	36.4733	62.8695	70.5519	65.7654	71.7125
3.17783	-0.26226	9.91964	33.3261	41.4152	44.4283	71.3787	77.4894	81.3007	85.5026
3.1845	-0.37384	11.9362	39.5441	46.7763	51.1584	76.7808	80.0176	93.3313	94.9492
3.19117	-0.481606	13.7525	45.1145	50.7793	56.1814	79.0067	78.299	99.9575	98.7773
3.19783	-0.581264	15.3055	49.7603	53.5483	59.4349	78.6572	73.4191	100.442	96.9787
3.2045	-0.671387	16.6273	53.3242	55.4385	61.244	76.7093	66.9818	95.4323	90.7898
3.21117	-0.754356	17.8342	55.7323	56.8485	62.1324	74.0962	60.5569	86.7229	82.2277
3.21783	-0.833035	19.0883	56.9539	58.0297	62.571	71.3887	55.2306	76.6253	73.3647
3.2245	-0.907421	20.5364	56.9806	58.9986	62.7956	68.7294	51.4426	67.2126	65.6924
3.23117	-0.976086	22.2602	55.8381	59.5813	62.7694	65.9757	49.099	59.7816	59.8478
3.23783	-1.03807	24.2553	53.6146	59.5326	62.2883	62.9129	47.8134	54.7414	55.7413
3.2445	-1.09291	26.4359	50.4742	58.6567	61.1277	59.4053	47.1315	51.8308	52.887
3.25117	-1.14203	28.6622	46.6475	56.8733	59.1569	55.4452	46.6609	50.4603	50.7159
3.25783	-1.1816	30.7713	42.3975	54.2288	56.3774	51.1336	46.1187	49.9845	48.7652
3.2645	-1.21117	32.6085	37.9791	50.8676	52.9017	46.6266	45.3334	49.8571	46.7372
3.27117	-1.23119	34.0433	33.6113	46.9899	48.9149	42.0938	44.2228	49.6798	44.486
3.27783	-1.24168	34.9789	29.4614	42.8133	44.6286	37.6873	42.7704	49.1996	41.9788
3.2845	-1.24121	35.3594	25.6433	38.5442	40.2479	33.5236	40.9989	48.2826	39.2523
3.29117	-1.22738	35.1715	22.2206	34.3575	35.9468	29.6812	38.9595	46.8855	36.3808
3.29783	-1.20115	34.4415	19.2184	30.3884	31.8594	26.2051	36.7169	45.0287	33.4501
3.3045	-1.16062	33.226	16.6321	26.7315	28.0795	23.1142	34.3418	42.7756	30.5419
3.31117	-1.10388	31.6048	14.4391	23.4451	24.6644	20.4053	31.9014	40.216	27.7271
3.31783	-1.02615	29.6731	12.6085	20.5569	21.6403	18.0578	29.4561	37.4508	25.0626
3.3245	-0.925064	27.5297	11.1055	18.0707	19.011	16.0441	27.0581	34.5793	22.5892
3.33117	-0.797749	25.2743	9.89532	15.9721	16.7623	14.3347	24.7536	31.6911	20.33
3.33783	-0.640392	22.9964	8.94308	14.235	14.8702	12.8965	22.5768	28.8668	18.2958
3.3445	-0.44775	20.7739	8.21829	12.8288	13.3052	11.6987	20.5507	26.1712	16.4871
3.35117	-0.21553	18.6696	7.69377	11.7211	12.0354	10.7117	18.6911	23.6497	14.8964
3.35783	0.0619888	16.7317	7.34615	10.8795	11.0278	9.90915	17.0069	21.3308	13.5112
3.3645	0.391483	14.9946	7.15446	10.2725	10.2506	9.26781	15.501	19.2313	12.3148
3.37117	0.780582	13.4788	7.10344	9.87148	9.67312	8.76617	14.1687	17.3588	11.2872
3.37783	1.23644	12.1951	7.18021	9.65261	9.27114	8.3847	13.0014	15.7113	10.4098
3.3845	1.7662	11.1437	7.37524	9.59539	9.02224	8.10719	11.9886	14.2779	9.66454
3.39117	2.37608	10.3197	7.68089	9.68027	8.90636	7.91883	11.1194	13.0439	9.0332
3.39783	3.07226	9.71222	8.09145	9.89008	8.90541	7.80869	10.3793	11.9934	8.49819
3.4045	3.85857	9.30834	8.60262	10.2139	9.0065	7.76672	9.75561	11.1074	8.04281
3.41117	4.73881	9.09424	9.21154	10.6416	9.19819	7.78675	9.23395	10.365	7.6561
3.41783	5.71346	9.05466	9.91726	11.1656	9.47189	7.86257	8.80289	9.74703	7.3266
3.4245	6.78349	9.17625	10.7212	11.7769	9.82094	7.99179	8.45051	9.23443	7.04241
3.43117	7.94935	9.44662	11.6262	12.4707	10.241	8.1706	8.16536	8.81004	6.79445
3.43783	9.21345	9.85527	12.6381	13.2451	10.7288	8.39567	7.93839	8.45718	6.57654
3.4445	10.5782	10.3936	13.7658	14.1006	11.2829	8.66556	7.76386	8.16345	6.38342
3.45117	12.0492	11.0559	15.0218	15.0399	11.9042	8.9817	7.63607	7.9217	6.2089
3.45783	13.6385	11.8432	16.4242	16.0708	12.5952	9.34505	7.55072	7.72476	6.04868
3.4645	15.3618	12.7568	17.9958	17.2062	13.361	9.758	7.50589	7.56693	5.90229
3.47117	17.2396	13.8011	19.7678	18.4622	14.2093	10.2243	7.49922	7.44343	5.76735
3.47783	19.2976	14.987	21.7776	19.8584	15.1544	10.7508	7.52926	7.35378	5.64146
3.4845	21.5683	16.3283	24.0769	21.4229	16.2129	11.3454	7.59506	7.29656	5.52368
3.49117	24.0922	17.8418	26.7305	23.191	17.405	12.0187	7.69711	7.26986	5.41306
3.49783	26.9203	19.5508	29.8285	25.2094	18.7559	12.7845	7.83634	7.27034	5.31101
3.5045	30.1166	21.4872	33.4949	27.5369	20.2975	13.66	8.01516	7.29704	5.21564
3.51117	33.7625	23.6955	37.9	30.2529	22.0714	14.6689	8.23736	7.35235	5.12552
3.51783	37.9648	26.2303	43.282	33.4654	24.1303	15.8415	8.50868	7.43818	5.04208
3.5245	42.8653	29.1629	49.9687	37.322	26.546	17.2181	8.8377	7.55644	4.96435
3.53117	48.6565	32.5885	58.4087	42.0241	29.4175	18.8522	9.23395	7.71189	4.89283
3.53783	55.604	36.6392	69.1981	47.8468	32.877	20.8163	9.71222	7.91025	4.82559
3.5445	64.085	41.5001	83.1041	55.1605	37.1022	23.2105	10.2906	8.16059	4.76408
3.55117	74.6379	47.4319	101.075	64.4608	42.3341	26.1693	10.9973	8.47387	4.70877
3.55783	88.0265	54.8062	124.225	76.3826	48.893	29.8762	11.867	8.86679	4.65822
3.5645	105.317	64.1479	153.776	91.7163	57.189	34.5712	12.9485	9.36174	4.61245
3.57117	127.947	76.1828	190.941	111.393	67.7342	40.5617	14.3085	9.99212	4.57335
3.57783	157.776	91.8851	236.738	136.452	81.1434	48.2283	16.036	10.8008	4.54044
3.5845	197.036	112.517	291.762	167.95	98.1178	58.0215	18.2495	11.847	4.51231
3.59117	248.179	139.628	355.925	206.827	119.4	70.4489	21.0986	13.2041	4.48704
3.59783	313.532	174.983	428.236	253.722	145.7	86.0348	24.7698	14.9646	4.46558
3.6045	394.763	220.391	506.68	308.759	177.598	105.268	29.4771	17.2362	4.44841
3.61117	492.222	277.416	588.25	371.357	215.409	128.52	35.4557	20.1392	4.43363
3.61783	604.319	346.985	669.173	440.098	259.052	155.962	42.9401	23.798	4.42076
3.6245	727.162	428.955	745.275	512.704	307.925	187.458	52.1388	28.3294	4.41027
3.63117	854.642	521.749	812.459	586.163	360.837	222.487	63.1928	33.823	4.40264
3.63783	979.035	622.194	867.162	656.977	416.008	260.103	76.1313	40.3199	4.39787
3.6445	1092.05	725.651	906.727	721.521	471.167	298.941	90.8289	47.7905	4.39501
3.65117	1186.04	826.454	929.629	776.442	523.745	337.298	106.971	56.1118	4.3931
3.65783	1255.06	918.593	935.513	819.011	571.118	373.265	124.033	65.0601	4.39358
3.6645	1295.6	996.497	925.076	847.369	610.882	404.905	141.291	74.3108	4.39501
3.67117	1306.75	1055.74	899.84	860.651	641.086	430.448	157.86	83.4517	4.39835
3.67783	1290.02	1093.51	861.908	858.963	660.411	448.469	172.769	92.0119	4.40168
3.6845	1248.68	1108.78	813.714	843.246	668.262	458.025	185.059	99.5049	4.40598
3.69117	1187.06	1102.22	757.792	815.07	664.741	458.726	193.888	105.477	4.41074
3.69783	1109.95	1075.79	696.607	776.414	650.566	450.742	198.627	109.553	4.4179
3.7045	1022.1	1032.39	632.443	729.468	626.936	434.75	198.939	111.477	4.43029
3.71117	927.932	975.36	567.351	676.442	595.374	411.839	194.812	111.141	4.44937
3.71783	831.347	908.192	503.1	619.459	557.586	383.381	186.566	108.592	4.47702
3.7245	735.608	834.227	441.146	560.482	515.323	350.904	174.798	104.027	4.51422
3.73117	643.316	756.51	382.639	501.254	470.28	315.964	160.315	97.7621	4.56476
3.73783	556.449	677.7	328.444	443.269	424.016	280.046	144.042	90.2019	4.63295
3.7445	476.388	600.036	279.152	387.753	377.902	244.477	126.922	81.7904	4.72307
3.75117	403.982	525.325	235.092	335.674	333.096	210.371	109.827	72.9747	4.83942
3.75783	339.615	454.957	196.352	287.737	290.526	178.595	93.4892	64.1675	4.98724
3.7645	283.289	389.944	162.823	244.395	250.892	149.759	78.4636	55.7184	5.17178
3.77117	234.704	330.945	134.236	205.865	214.67	124.222	65.1073	47.8959	5.39398
3.77783	193.343	278.299	110.207	172.164	182.139	102.118	53.5955	40.8816	5.65577
3.7845	158.544	232.068	90.2739	143.141	153.405	83.3869	43.9467	34.7786	5.95474
3.79117	129.57	192.079	73.9346	118.509	128.421	67.8234	36.0637	29.6144	6.28901
3.79783	105.662	157.979	60.6866	97.8832	107.016	55.1252	29.7747	25.3563	6.65569
3.8045	86.0872	129.285	50.0517	80.8191	88.9277	44.939	24.8661	21.9293	7.04908
3.81117	70.1652	105.44	41.5955	66.8507	73.8354	36.8943	21.1158	19.2337	7.46298
3.81783	57.291	85.8521	34.9317	55.5186	61.3899	30.632	18.3129	17.1623	7.89022
3.8245	46.9394	69.9358	29.7284	46.3929	51.2347	25.8279	16.2697	15.6054	8.32367
3.83117	38.6662	57.137	25.7049	39.0878	43.0274	22.2015	14.8277	14.461	8.75854
3.83783	32.1002	46.9522	22.6264	33.2718	36.4523	19.5122	13.8555	13.6404	9.19247
3.8445	26.9356	38.9347	20.3023	28.6665	31.2304	17.5581	13.248	13.0715	9.62543
3.85117	22.9225	32.6996	18.5757	25.0444	27.123	16.1743	12.9232	12.7001	10.0579
3.85783	19.8598	27.9183	17.3221	22.2197	23.9272	15.2292	12.8164	12.4826	10.4914
3.8645	17.5819	24.3187	16.4433	20.0453	21.4744	14.6203	12.8746	12.3882	10.9277
3.87117	15.9545	21.6732	15.8639	18.4059	19.6252	14.267	13.0534	12.3954	11.3654
3.87783	14.8597	19.7945	15.5244	17.2114	18.2667	14.1077	13.3128	12.4898	11.7998
3.8845	14.1859	18.5213	15.3689	16.3903	17.3073	14.0924	13.6127	12.6572	12.2228
3.89117	13.8187	17.7116	15.3365	15.8796	16.6693	14.1764	13.9084	12.8803	12.6233
3.89783	13.6385	17.2334	15.3565	15.6178	16.2845	14.3132	14.1511	13.1354	12.9881
3.9045	13.5255	16.9578	15.3508	15.5344	16.0861	14.4506	14.2903	13.3924	13.2971
3.91117	13.3672	16.7565	15.2411	15.5487	16.0084	14.5307	14.2784	13.6099	13.5264
3.91783	13.0749	16.5143	14.9603	15.5697	15.9822	14.4963	14.0815	13.7424	13.648
3.9245	12.5961	16.1376	14.4677	15.5048	15.933	14.3023	13.689	13.7424	13.6342
3.93117	11.9185	15.5683	13.7591	15.2774	15.7905	13.9246	13.1154	13.577	13.4621
3.93783	11.0693	14.7886	12.8665	14.8401	15.4958	13.3648	12.3978	13.2308	13.1187
3.9445	10.1027	13.8235	11.8489	14.1854	15.0175	12.6491	11.5881	12.7144	12.61
3.95117	9.08899	12.7296	10.7799	13.3419	14.3518	11.8275	10.746	12.0616	11.96
3.95783	8.09193	11.579	9.72843	12.3672	13.525	10.9587	9.92823	11.3244	11.2147
3.9645	7.16114	10.4432	8.74805	11.3354	12.5871	10.1013	9.17625	10.5624	10.426
3.97117	6.3262	9.37843	7.8702	10.3183	11.6014	9.30023	8.51536	9.83095	9.65023
3.97783	5.59711	8.41856	7.10583	9.37033	10.6325	8.58402	7.95412	9.17053	8.93545
3.9845	4.97007	7.5779	6.45113	8.52203	9.73082	7.96604	7.4892	8.6031	8.31413
3.99117	4.43077	6.8512	5.89275	7.7858	8.92687	7.4439	7.10869	8.13532	7.8001
3.99783	3.9649	6.22654	5.41687	7.16114	8.23259	7.00712	6.79922	7.76148	7.39098
4.0045	3.55911	5.68914	5.01251	6.63376	7.64465	6.64139	6.54888	7.46965	7.07579
4.01117	3.20196	5.22661	4.67443	6.18649	7.15065	6.33287	6.35052	7.24506	6.8388
4.01783	2.88343	4.82988	4.40216	5.80502	6.73437	6.07061	6.20222	7.07626	6.66285
4.0245	2.59399	4.498	4.20284	5.48363	6.37865	5.8465	6.11448	6.96087	6.53696
4.03117	2.32363	4.2367	4.09174	5.2228	6.06966	5.65767	6.1121	6.90794	6.45542
4.03783	2.06423	4.05836	4.08459	5.02872	5.79929	5.50795	6.23083	6.93893	6.42204
4.0445	1.80817	3.97205	4.18472	4.91905	5.56231	5.41306	6.49929	7.08294	6.44636
4.05117	1.5502	3.98016	4.37307	4.91571	5.35965	5.39875	6.9232	7.36713	6.55174
4.05783	1.28889	4.06313	4.60672	5.03397	5.20086	5.50079	7.4687	7.79867	6.76537
4.0645	1.02425	4.17852	4.82225	5.26857	5.10502	5.74875	8.05759	8.35037	7.10392
4.07117	0.760555	4.26912	4.951	5.58138	5.10216	6.15168	8.57973	8.95166	7.56216
4.07783	0.502586	4.2758	4.93431	5.90563	5.22423	6.67524	8.92639	9.50289	8.10099
4.0845	0.256062	4.15421	4.74691	6.15644	5.48744	7.23553	9.01985	9.89914	8.6484
4.09117	0.026226	3.88527	4.3993	6.25229	5.87463	7.72047	8.83961	10.0608	9.11188
4.09783	-0.184059	3.48616	3.93295	6.14166	6.32572	8.01897	8.42524	9.95636	9.40228
4.1045	-0.373364	3.00169	3.407	5.81789	6.74725	8.05569	7.86209	9.6097	9.46426
4.11117	-0.53978	2.48814	2.88057	5.31721	7.03478	7.80964	7.25174	9.09376	9.28831
4.11783	-0.682831	1.99938	2.39801	4.70972	7.1044	7.32136	6.67906	8.50296	8.91495
4.1245	-0.805855	1.57118	1.98078	4.07553	6.91605	6.67763	6.19793	7.92837	8.41904
4.13117	-0.911236	1.21927	1.63221	3.48473	6.48737	5.98621	5.82647	7.43008	7.88689
4.13783	-1.00136	0.94223	1.34659	2.9788	5.88465	5.33867	5.55372	7.03621	7.39241
4.1445	-1.07765	0.7267	1.11485	2.56824	5.20134	4.79126	5.35727	6.74391	6.97899
4.15117	-1.1425	0.556946	0.926971	2.24638	4.529	4.36068	5.21708	6.53601	6.66285
4.15783	-1.19781	0.419617	0.775814	1.99604	3.93248	4.03929	5.11789	6.39057	6.43635
4.1645	-1.24502	0.305176	0.657082	1.80149	3.44229	3.80754	5.04637	6.28757	6.28042
4.17117	-1.28508	0.208378	0.564098	1.6489	3.05891	3.64304	4.99296	6.21462	6.17552
4.17783	-1.31845	0.124454	0.491142	1.53017	2.76661	3.52859	4.95243	6.16217	6.10542
4.1845	-1.34134	0.0534058	0.434399	1.43909	2.54774	3.45087	4.92001	6.12402	6.06155
4.19117	-1.34468	-0.0052452	0.395775	1.37234	2.38752	3.39699	4.89187	6.0935	6.03342
4.19783	-1.31369	-0.04673	0.383377	1.32751	2.27213	3.35789	4.8666	6.06823	6.0153
4.2045	-1.22786	-0.0596046	0.41151	1.31083	2.18821	3.32546	4.84467	6.04582	6.001
4.21117	-1.06716	-0.0276566	0.498772	1.33657	2.1286	3.29924	4.82893	6.02722	5.98907
4.21783	-0.82159	0.0653267	0.655174	1.42813	2.09141	3.27921	4.8213	6.01387	5.97715
4.2245	-0.507832	0.231266	0.875473	1.60694	2.08139	3.26967	4.82416	6.00958	5.96476
4.23117	-0.168323	0.462055	1.13153	1.88208	2.10619	3.27492	4.83894	6.01721	5.95379
4.23783	0.13876	0.72813	1.37901	2.23827	2.17772	3.29971	4.86422	6.03914	5.94664
4.2445	0.351906	0.980377	1.56879	2.63023	2.30837	3.34358	4.89473	6.07347	5.94711
4.25117	0.427723	1.1673	1.65939	2.99025	2.49672	3.39746	4.92287	6.11591	5.95808
4.25783	0.351429	1.24836	1.63221	3.24583	2.7194	3.44849	4.94385	6.16074	5.98192
4.2645	0.144005	1.20592	1.49536	3.34311	2.93684	3.48473	4.95529	6.20365	6.01864
4.27117	-0.147819	1.05	1.28078	3.2649	3.10612	3.49808	4.95768	6.24228	6.06871
4.27783	-0.466824	0.815392	1.03188	3.03268	3.19004	3.48377	4.95481	6.27661	6.13022
4.2845	-0.761032	0.54884	0.788689	2.69747	3.16954	3.4461	4.951	6.30808	6.2027
4.29117	-0.997066	0.293732	0.579834	2.32506	3.04985	3.39365	4.951	6.3405	6.2809
4.29783	-1.16253	0.0786781	0.418186	1.97315	2.85864	3.33691	4.95481	6.37436	6.36148
4.3045	-1.25074	-0.0824928	0.30756	1.6799	2.635	3.2835	4.96531	6.41251	6.43826
4.31117	-1.24788	-0.185013	0.252724	1.46008	2.41661	3.23725	4.98247	6.45494	6.5093
4.31783	-1.12057	-0.217915	0.266552	1.31226	2.22826	3.20148	5.0106	6.50167	6.57225
4.3245	-0.816345	-0.15831	0.378609	1.23405	2.08426	3.17812	5.0559	6.55508	6.62708
4.33117	-0.279427	0.0305176	0.631809	1.23215	1.98936	3.17144	5.12934	6.62136	6.67763
4.33783	0.513077	0.386238	1.06096	1.3299	1.95074	3.19052	5.2433	6.71101	6.72865
4.3445	1.51062	0.923634	1.66559	1.5564	1.98936	3.25203	5.40304	6.83212	6.78492
4.35117	2.58064	1.60933	2.38943	1.93405	2.14005	3.37315	5.60236	6.98853	6.84834
4.35783	3.53432	2.35415	3.12662	2.45476	2.44093	3.56388	5.82218	7.17592	6.92272
4.3645	4.18234	3.02887	3.74126	3.0632	2.91014	3.81708	6.03294	7.38144	7.01046
4.37117	4.39024	3.50285	4.11129	3.66306	3.51954	4.10509	6.20365	7.58266	7.10964
4.37783	4.11987	3.67928	4.16136	4.14133	4.18758	4.38404	6.30808	7.75433	7.21359
4.3845	3.44038	3.52764	3.88908	4.40216	4.79698	4.60625	6.33478	7.87497	7.31564
4.39117	2.50816	3.08895	3.36552	4.39405	5.22852	4.73261	6.28996	7.93362	7.411
4.39783	1.51157	2.46525	2.71225	4.12512	5.39541	4.74453	6.19268	7.9298	7.49016
4.4045	0.612736	1.78385	2.0647	3.66068	5.26905	4.65202	6.07014	7.87449	7.54642
4.41117	-0.0925064	1.15585	1.53208	3.10278	4.88949	4.49085	5.94854	7.78723	7.57599
4.41783	-0.579834	0.651836	1.17493	2.55442	4.35591	4.31156	5.84888	7.68614	7.57933
4.4245	-0.876903	0.293732	1.00231	2.09284	3.79419	4.1647	5.77927	7.58457	7.56025
4.43117	-1.03283	0.067234	0.985622	1.75381	3.3145	4.08697	5.73826	7.49063	7.52258
4.43783	-1.09673	-0.0591278	1.07956	1.53685	2.98691	4.09555	5.71918	7.40671	7.47156
4.4445	-1.10531	-0.117779	1.23835	1.4205	2.82907	4.18377	5.71442	7.3328	7.41434
4.45117	-1.08099	-0.135422	1.43337	1.37568	2.81954	4.3292	5.72062	7.26795	7.35521
4.45783	-1.03521	-0.127315	1.65081	1.37758	2.91872	4.50754	5.7354	7.21073	7.29942
4.4645	-0.975609	-0.102997	1.88637	1.40858	3.08466	4.70209	5.75781	7.16209	7.24888
4.47117	-0.909328	-0.0677109	2.12955	1.45912	3.28875	4.90713	5.78785	7.12395	7.20596
4.47783	-0.851154	-0.026226	2.35891	1.52445	3.51667	5.12171	5.82314	7.0982	7.17163
4.4845	-0.818729	0.0109672	2.53487	1.59931	3.76129	5.34153	5.85651	7.08532	7.14922
4.49117	-0.82922	0.0329018	2.61211	1.67179	4.00877	5.55038	5.87845	7.08485	7.13968
4.49783	-0.89407	0.0276566	2.55346	1.72853	4.23098	5.71918	5.87988	7.09486	7.14159
4.5045	-1.01089	-0.0100136	2.35081	1.75571	4.38786	5.80788	5.85461	7.11393	7.15399
4.51117	-1.16682	-0.0801086	2.02703	1.74379	4.43935	5.78403	5.80406	7.13921	7.17449
4.51783	-1.33848	-0.173569	1.63174	1.68991	4.35829	5.63431	5.73349	7.16496	7.19881
4.5245	-1.50108	-0.276089	1.22595	1.60217	4.14181	5.37395	5.65195	7.18498	7.21979
4.53117	-1.6346	-0.372887	0.862122	1.49727	3.81804	5.04065	5.56421	7.19309	7.22837
4.53783	-1.73092	-0.452042	0.571728	1.39236	3.43704	4.68493	5.47028	7.18117	7.21407
4.5445	-1.791	-0.508785	0.358582	1.29986	3.05557	4.35066	5.36251	7.13825	7.16734
4.55117	-1.82295	-0.545979	0.207901	1.22213	2.71606	4.06265	5.2309	7.04956	7.07865
4.55783	-1.8363	-0.572681	0.0972748	1.15395	2.43807	3.82042	5.06163	6.9046	6.93846
4.5645	-1.84011	-0.596046	0.00715256	1.08767	2.21634	3.60823	4.84467	6.69384	6.73866
4.57117	-1.83916	-0.621319	-0.0743866	1.0128	2.03228	3.40414	4.57573	6.41155	6.47497
4.57783	-1.83582	-0.65136	-0.153542	0.922203	1.86396	3.19004	4.25768	6.05869	6.14786
4.5845	-1.83105	-0.687122	-0.232697	0.814438	1.69563	2.95448	3.90148	5.64528	5.76353
4.59117	-1.82295	-0.725746	-0.310898	0.692844	1.51777	2.69651	3.52144	5.18894	5.33438
4.59783	-1.81103	-0.762939	-0.383377	0.564575	1.33038	2.42233	3.1352	4.71067	4.87471
4.6045	-1.79482	-0.794411	-0.447273	0.435829	1.13726	2.14148	2.75993	4.23098	4.40407
4.61117	-1.77526	-0.819683	-0.502109	0.313282	0.945091	1.86682	2.40993	3.77083	3.94344
4.61783	-1.75381	-0.837803	-0.550747	0.200748	0.762463	1.60742	2.09475	3.34549	3.50857
4.6245	-1.7314	-0.851631	-0.594139	0.100136	0.595093	1.37138	1.8177	2.96545	3.11041
4.63117	-1.70994	-0.864983	-0.635624	0.0100136	0.446796	1.16205	1.57833	2.63023	2.75469
4.63783	-1.69039	-0.880241	-0.677586	-0.0729561	0.319004	0.979424	1.37234	2.33936	2.44331
4.6445	-1.67418	-0.897884	-0.722408	-0.153065	0.209332	0.822067	1.19543	2.08855	2.17247
4.65117	-1.66368	-0.918865	-0.770092	-0.231743	0.114441	0.686646	1.04237	1.87159	1.93691
4.65783	-1.66273	-0.944614	-0.820637	-0.308991	0.0309944	0.567913	0.907898	1.68228	1.73044
4.6645	-1.67179	-0.976086	-0.872135	-0.384808	-0.0433922	0.460148	0.788689	1.51443	1.54734
4.67117	-1.69039	-1.01185	-0.92268	-0.458717	-0.112057	0.361443	0.682354	1.36375	1.38426
4.67783	-1.71566	-1.04952	-0.96941	-0.527859	-0.176907	0.26989	0.586033	1.22833	1.23787
4.6845	-1.74379	-1.08767	-1.01089	-0.590324	-0.238895	0.186443	0.498295	1.10626	1.10579
4.69117	-1.77097	-1.12295	-1.0457	-0.64373	-0.296593	0.110149	0.418186	0.997543	0.986576
4.69783	-1.79148	-1.15442	-1.07288	-0.688076	-0.349998	0.0429153	0.347137	0.901699	0.880718
4.7045	-1.7972	-1.17779	-1.09053	-0.722885	-0.398159	-0.0152588	0.286579	0.819683	0.787735
4.71117	-1.77479	-1.18876	-1.09386	-0.747204	-0.439167	-0.0629425	0.239849	0.753403	0.709057
4.71783	-1.70374	-1.17826	-1.07002	-0.759602	-0.471115	-0.0991821	0.215054	0.704288	0.644684
4.7245	-1.55354	-1.13106	-0.99659	-0.754833	-0.490665	-0.120163	0.226974	0.677586	0.597
4.73117	-1.28984	-1.01995	-0.842571	-0.720024	-0.491619	-0.117779	0.300407	0.687122	0.575066
4.73783	-0.888348	-0.808239	-0.571251	-0.631809	-0.45681	-0.0720024	0.463009	0.756741	0.594139
4.7445	-0.353336	-0.465393	-0.159264	-0.45824	-0.359058	0.04673	0.740528	0.915527	0.678062
4.75117	0.272274	0.0195503	0.388622	-0.164509	-0.165939	0.27132	1.14107	1.18876	0.855446
4.75783	0.908375	0.618935	1.02329	0.268936	0.154972	0.627518	1.63984	1.58119	1.14775
4.7645	1.45531	1.26457	1.65939	0.827312	0.617027	1.11341	2.17676	2.0647	1.55735
4.77117	1.82009	1.85776	2.19345	1.45435	1.19638	1.68991	2.66552	2.57826	2.04992
4.77783	1.94597	2.2974	2.53296	2.06232	1.82819	2.28071	3.02076	3.03698	2.55966
4.7845	1.82343	2.50912	2.6226	2.54869	2.41613	2.78807	3.1786	3.35693	3.00217
4.79117	1.49441	2.46429	2.45857	2.82669	2.85864	3.12233	3.11232	3.47853	3.29781
4.79783	1.03426	2.18725	2.08807	2.85101	3.07751	3.22437	2.84338	3.38268	3.39365
4.8045	0.527382	1.74427	1.59216	2.63071	3.03841	3.08275	2.43044	3.09658	3.27921
4.81117	0.0448227	1.22213	1.05667	2.22206	2.76041	2.73609	1.94883	2.67792	2.985
4.81783	-0.370979	0.69952	0.549793	1.70469	2.30694	2.25639	1.46341	2.19727	2.57349
4.8245	-0.703335	0.230789	0.109196	1.16158	1.76287	1.72567	1.01805	1.71566	2.11477
4.83117	-0.955105	-0.160217	-0.25177	0.655651	1.20735	1.21021	0.632763	1.27363	1.66368
4.83783	-1.13583	-0.469208	-0.534535	0.220776	0.697136	0.751972	0.311852	0.891209	1.2536
4.8445	-1.2536	-0.701904	-0.747204	-0.133514	0.261784	0.367165	0.0510216	0.572681	0.897408
4.85117	-1.31512	-0.864983	-0.897884	-0.411034	-0.0905991	0.0548363	-0.153065	0.319004	0.598907
4.85783	-1.32895	-0.965595	-0.991821	-0.617027	-0.362396	-0.188828	-0.302315	0.127792	0.355244
4.8645	-1.30701	-1.0128	-1.03664	-0.759125	-0.560284	-0.369072	-0.399589	-0.002861	0.166416
4.87117	-1.26171	-1.01709	-1.04284	-0.843048	-0.690937	-0.490665	-0.453472	-0.0805855	0.0319481
4.87783	-1.20974	-0.995636	-1.02806	-0.879288	-0.763893	-0.562191	-0.477791	-0.117779	-0.0519753
4.8845	-1.1673	-0.966072	-1.01089	-0.882149	-0.794411	-0.594616	-0.490189	-0.134468	-0.0982285
4.89117	-1.15061	-0.947475	-1.00756	-0.870228	-0.801086	-0.60463	-0.511169	-0.151634	-0.125408
4.89783	-1.1673	-0.953674	-1.02901	-0.864029	-0.805378	-0.614643	-0.555515	-0.190258	-0.154495
4.9045	-1.21593	-0.992775	-1.08099	-0.880718	-0.824451	-0.643253	-0.630856	-0.262737	-0.203133
4.91117	-1.28984	-1.0643	-1.16205	-0.928879	-0.870228	-0.700474	-0.734806	-0.371456	-0.282764
4.91783	-1.37711	-1.15967	-1.26076	-1.00851	-0.945091	-0.788212	-0.859261	-0.508308	-0.396252
4.9245	-1.46532	-1.26648	-1.36423	-1.11198	-1.04237	-0.901222	-0.993252	-0.662804	-0.535965
4.93117	-1.54591	-1.37091	-1.45864	-1.2269	-1.15299	-1.02901	-1.12247	-0.819683	-0.688076
4.93783	-1.61219	-1.46389	-1.53685	-1.34087	-1.26362	-1.15538	-1.23549	-0.965118	-0.83828
4.9445	-1.6613	-1.53828	-1.59264	-1.44196	-1.36375	-1.26791	-1.32513	-1.08814	-0.974178
4.95117	-1.69468	-1.59454	-1.62315	-1.52445	-1.44577	-1.35708	-1.39189	-1.18542	-1.08814
4.95783	-1.71566	-1.63221	-1.62983	-1.58691	-1.50585	-1.41907	-1.4348	-1.25694	-1.17636
4.9645	-1.72567	-1.65606	-1.61743	-1.62983	-1.544	-1.45292	-1.45245	-1.3051	-1.23882
4.97117	-1.7271	-1.66893	-1.58787	-1.65701	-1.56116	-1.45912	-1.44386	-1.32942	-1.27649
4.97783	-1.72281	-1.67227	-1.54161	-1.66988	-1.5564	-1.43814	-1.40429	-1.32656	-1.28984
4.9845	-1.71423	-1.66416	-1.47772	-1.66893	-1.53065	-1.3895	-1.31559	-1.28746	-1.27363
4.99117	-1.70279	-1.63794	-1.38712	-1.64986	-1.48296	-1.3051	-1.13678	-1.18876	-1.21546
4.99783	-1.6861	-1.57881	-1.24216	-1.60265	-1.40667	-1.16444	-0.783443	-0.980854	-1.08433
5.0045	-1.66082	-1.46008	-0.977993	-1.5049	-1.28889	-0.915527	-0.0772476	-0.557899	-0.818253
5.01117	-1.62268	-1.22595	-0.462055	-1.30558	-1.09386	-0.443935	1.35946	0.306129	-0.285149
5.01783	-1.56546	-0.768661	0.554562	-0.903606	-0.741005	0.504971	4.27008	2.07901	0.793934
5.0245	-1.48487	0.100613	2.491	-0.0948906	-0.0524521	2.44665	9.97066	5.66387	2.99788
5.03117	-1.37663	1.67179	5.9433	1.48869	1.31941	6.32334	20.4611	12.6176	7.42531
5.03783	-1.23882	4.31252	11.5962	4.43411	4.00114	13.6189	38.2299	25.2309	15.9235
5.0445	-1.07288	8.38089	19.9938	9.52435	8.96788	26.2475	65.5651	46.2232	31.1308
5.05117	-0.88644	14.061	31.2281	17.5705	17.4809	46.0529	103.431	77.8923	56.0489
5.05783	-0.691891	21.1916	44.6668	29.0799	30.7708	73.9284	150.35	120.861	93.0147
5.0645	-0.506401	29.1667	58.8899	43.8638	49.4847	108.888	201.899	172.95	142.287
5.07117	-0.349998	36.9887	71.918	60.7796	73.0891	147.604	251.261	228.827	200.895
5.07783	-0.24128	43.4785	81.6846	77.7874	99.5383	184.813	290.749	280.819	262.44
5.0845	-0.192642	47.5807	86.5917	92.3572	125.466	214.548	313.839	320.71	318.193
5.09117	-0.205517	48.6526	85.948	102.116	146.906	231.736	316.969	341.927	359.213
5.09783	-0.272274	46.6385	80.1425	105.493	160.323	233.63	300.487	341.36	378.753
5.1045	-0.378132	42.0628	70.4842	102.152	163.587	220.56	268.403	320.164	374.132
5.11117	-0.506401	35.851	58.7769	93.0438	156.553	195.731	227.027	283.242	347.39
5.11783	-0.639915	29.0465	46.7954	80.0738	141.035	164.138	183.069	237.619	304.477
5.1245	-0.766754	22.5387	35.8791	65.4998	120.172	131.012	141.955	190.376	253.32
5.13117	-0.880241	16.901	26.7591	51.3225	97.4669	100.48	106.961	146.981	201.553
5.13783	-0.976086	12.3687	19.6199	38.8889	75.8724	74.8968	79.2232	110.527	154.804
5.1445	-1.05333	8.92067	14.2846	28.8029	57.2591	54.9402	58.3515	81.8973	116.038
5.15117	-1.11294	6.39486	10.4127	21.0805	42.3651	40.1444	43.1776	60.4773	85.8808
5.15783	-1.15633	4.58574	7.64513	15.3985	31.0802	29.5238	32.351	44.9452	63.458
5.1645	-1.18446	3.30353	5.67484	11.3158	22.8376	22.0194	24.6716	33.8631	47.2546
5.17117	-1.19734	2.39563	4.26865	8.41093	16.9392	16.7322	19.1998	25.9857	35.7051
5.17783	-1.19686	1.75047	3.2568	6.34336	12.7473	12.9809	15.2559	20.3538	27.4878
5.1845	-1.18637	1.28937	2.51913	4.85992	9.76133	10.2863	12.3653	16.2778	21.5993
5.19117	-1.16634	0.957966	1.97458	3.78561	7.61366	8.31699	10.2057	13.2799	17.3235
5.19783	-1.13726	0.720501	1.56879	2.99692	6.04677	6.84929	8.56209	11.0354	14.1659
5.2045	-1.10054	0.553131	1.26505	2.41327	4.8852	5.73444	7.2875	9.3236	11.7888
5.21117	-1.05762	0.43869	1.0376	1.97601	4.0102	4.87232	6.28233	7.99513	9.96399
5.21783	-1.01185	0.363827	0.867844	1.647	3.34263	4.19521	5.47695	6.94799	8.53777
5.2245	-0.964165	0.319958	0.742435	1.39904	2.82717	3.65639	4.82464	6.11353	7.40671
5.23117	-0.915527	0.300407	0.650883	1.21355	2.42472	3.22342	4.29249	5.44262	6.49834
5.23783	-0.865936	0.299454	0.587463	1.07574	2.1081	2.87437	3.8538	4.89855	5.75972
5.2445	-0.817776	0.311852	0.545502	0.973701	1.85871	2.59161	3.48997	4.45318	5.15509
5.25117	-0.772476	0.333309	0.52166	0.897408	1.6613	2.3613	3.18718	4.08459	4.65679
5.25783	-0.729561	0.362873	0.513077	0.841618	1.50347	2.1739	2.93541	3.77846	4.2448
5.2645	-0.686646	0.399113	0.52166	0.803947	1.37663	2.02322	2.72846	3.52287	3.90148
5.27117	-0.6423	0.444412	0.54884	0.781059	1.27792	1.90544	2.55966	3.3102	3.61443
5.27783	-0.596046	0.501633	0.597	0.772476	1.20544	1.81913	2.42472	3.13568	3.3741
5.2845	-0.544071	0.575542	0.669003	0.780582	1.15919	1.76334	2.32172	2.99692	3.1743
5.29117	-0.481129	0.669956	0.768661	0.809193	1.14107	1.73903	2.25163	2.89345	3.0117
5.29783	-0.404835	0.788689	0.895977	0.863552	1.15108	1.74761	2.21491	2.82431	2.88248
5.3045	-0.315189	0.93174	1.04523	0.945091	1.19162	1.78814	2.20871	2.78902	2.78425
5.31117	-0.212193	1.09434	1.20783	1.05381	1.26266	1.85633	2.2316	2.7895	2.71797
5.31783	-0.0972748	1.26982	1.37186	1.18732	1.36089	1.94359	2.27737	2.8224	2.68459
5.3245	0.0247955	1.44958	1.52779	1.33657	1.47867	2.04182	2.34032	2.88486	2.68221
5.33117	0.150681	1.62554	1.66559	1.49441	1.60503	2.14291	2.41375	2.97117	2.70748
5.33783	0.277996	1.79195	1.78385	1.65033	1.7314	2.24066	2.49243	3.07512	2.75612
5.3445	0.407696	1.94883	1.89018	1.79911	1.8487	2.33507	2.5773	3.19338	2.82431
5.35117	0.541687	2.10285	1.99652	1.93977	1.95456	2.42853	2.67315	3.32451	2.90775
5.35783	0.685215	2.26307	2.1162	2.0771	2.04945	2.53201	2.78807	3.47185	3.00455
5.3645	0.843048	2.44045	2.26164	2.21968	2.14386	2.65694	2.92921	3.64208	3.11899
5.37117	1.01948	2.64359	2.44141	2.37846	2.25019	2.81143	3.10183	3.84331	3.2568
5.37783	1.2145	2.87819	2.65837	2.56157	2.3818	3.00074	3.31068	4.08411	3.42464
5.3845	1.4267	3.14474	2.91061	2.77615	2.54822	3.22628	3.55577	4.36926	3.63159
5.39117	1.65176	3.43895	3.19242	3.02315	2.75326	3.48473	3.83282	4.69923	3.88336
5.39783	1.88303	3.75414	3.49474	3.30114	2.99501	3.76749	4.13179	5.0683	4.18139
5.4045	2.11287	4.0803	3.80754	3.60346	3.26824	4.06361	4.44221	5.46646	4.51851
5.41117	2.33364	4.40693	4.11844	3.92103	3.56388	4.36258	4.75359	5.88179	4.88424
5.41783	2.53534	4.72164	4.41647	4.24194	3.86858	4.65059	5.05352	6.29854	5.26524
5.4245	2.71034	5.01347	4.68779	4.55427	4.17137	4.91714	5.32866	6.70004	5.64718
5.43117	2.85244	5.27	4.92334	4.8461	4.46033	5.15032	5.56421	7.06768	6.01244
5.43783	2.95782	5.48077	5.11312	5.10645	4.72546	5.34201	5.75209	7.38573	6.34432
5.4445	3.0241	5.63812	5.25141	5.32532	4.95625	5.48506	5.88608	7.64179	6.62994
5.45117	3.04937	5.73635	5.33485	5.49412	5.1446	5.57184	5.96094	7.82633	6.85692
5.45783	3.03602	5.77593	5.36203	5.60713	5.28383	5.60141	5.97429	7.93314	7.01618
5.4645	2.98738	5.75829	5.33628	5.66339	5.37014	5.57613	5.92804	7.95937	7.10297
5.47117	2.90775	5.68914	5.26381	5.66292	5.40113	5.50127	5.8279	7.90739	7.11489
5.47783	2.8019	5.57613	5.15318	5.60999	5.3792	5.38301	5.68151	7.78294	7.0529
5.4845	2.67458	5.42736	5.01633	5.51128	5.3091	5.23138	5.49793	7.59554	6.92368
5.49117	2.53201	5.25331	4.86374	5.37395	5.19896	5.05638	5.28479	7.35569	6.7358
5.49783	2.37846	5.06115	4.70257	5.20802	5.05829	4.86612	5.05257	7.07579	6.50072
5.5045	2.21825	4.85659	4.53568	5.02253	4.89664	4.66633	4.80843	6.76775	6.22797
5.51117	2.05612	4.64344	4.36163	4.82464	4.7226	4.4589	4.55713	6.44112	5.92756
5.51783	1.89447	4.42457	4.17614	4.61626	4.5414	4.24337	4.30012	6.10399	5.61094
5.5245	1.73569	4.19998	3.97444	4.40073	4.35448	4.01926	4.03976	5.7621	5.28574
5.53117	1.57976	3.97158	3.75366	4.17948	4.15897	3.78752	3.77798	5.42116	4.95911
5.53783	1.43003	3.73983	3.5162	3.9525	3.95155	3.54719	3.51715	5.08308	4.63533
5.5445	1.28746	3.50666	3.26729	3.72124	3.73125	3.30257	3.26157	4.75216	4.31824
5.55117	1.15204	3.27587	3.01504	3.48711	3.49808	3.05748	3.01456	4.43411	4.01211
5.55783	1.02234	3.04985	2.76613	3.25441	3.25584	2.81763	2.77901	4.13084	3.7179
5.5645	0.898361	2.83003	2.52676	3.02649	3.01027	2.58636	2.5568	3.84378	3.43895
5.57117	0.778675	2.61879	2.30074	2.80571	2.76804	2.36702	2.3489	3.57342	3.17621
5.57783	0.664711	2.41661	2.0895	2.59447	2.53534	2.16293	2.15435	3.32022	2.93064
5.5845	0.556469	2.22397	1.89257	2.39277	2.31504	1.97315	1.9722	3.08323	2.70224
5.59117	0.454903	2.04039	1.70994	2.2006	2.11	1.7972	1.80197	2.85959	2.49243
5.59783	0.359535	1.86586	1.54018	2.01702	1.91927	1.63603	1.64509	2.65026	2.30217
5.6045	0.271797	1.70326	1.38617	1.84107	1.74046	1.49012	1.50347	2.4581	2.1348
5.61117	0.193596	1.55401	1.24741	1.67513	1.57309	1.35994	1.37711	2.28548	1.99842
5.61783	0.123024	1.41811	1.12295	1.52159	1.41907	1.24407	1.26553	2.13242	1.89972
5.6245	0.0572205	1.29461	1.00994	1.38235	1.28031	1.14059	1.16634	1.99842	1.84202
5.63117	-0.005722	1.18208	0.907421	1.25599	1.15633	1.0457	1.07622	1.88112	1.82104
5.63783	-0.067234	1.07718	0.812054	1.1425	1.04475	0.953674	0.988007	1.77336	1.82295
5.6445	-0.129223	0.975132	0.718117	1.03855	0.943184	0.860214	0.8955	1.66798	1.82629
5.65117	-0.19455	0.872612	0.623226	0.939369	0.84734	0.762463	0.797272	1.55783	1.80626
5.65783	-0.263214	0.767708	0.525475	0.840187	0.752449	0.660419	0.692844	1.44053	1.74522
5.6645	-0.332832	0.660896	0.426292	0.738144	0.655174	0.556469	0.583649	1.31416	1.63603
5.67117	-0.401974	0.554562	0.326157	0.633717	0.554562	0.452995	0.473499	1.18303	1.48058
5.67783	-0.469208	0.451088	0.227928	0.528336	0.451088	0.355244	0.367165	1.05238	1.29318
5.6845	-0.532627	0.353813	0.134468	0.423908	0.347137	0.265598	0.267029	0.927925	1.09434
5.69117	-0.591278	0.263214	0.0486374	0.324726	0.246048	0.18549	0.174046	0.811577	0.902176
5.69783	-0.644684	0.179768	-0.0300407	0.231266	0.151157	0.11158	0.0882149	0.703335	0.727177
5.7045	-0.693798	0.10252	-0.10252	0.144482	0.0624657	0.043869	0.0100136	0.604153	0.573635
5.71117	-0.739574	0.0300407	-0.169754	0.0629425	-0.0185966	-0.0185966	-0.0624657	0.512123	0.441551
5.71783	-0.782013	-0.0386238	-0.23222	-0.0119209	-0.0929832	-0.0758171	-0.1297	0.425816	0.328064
5.7245	-0.822544	-0.104427	-0.291824	-0.0815392	-0.160694	-0.130177	-0.190258	0.344753	0.228405
5.73117	-0.860214	-0.166416	-0.349522	-0.147819	-0.222683	-0.182152	-0.246525	0.267982	0.139236
5.73783	-0.895977	-0.225544	-0.405788	-0.210285	-0.279903	-0.230789	-0.300407	0.195026	0.0591278
5.7445	-0.931263	-0.281811	-0.458717	-0.268936	-0.333309	-0.277996	-0.353813	0.125408	-0.0128746
5.75117	-0.966072	-0.334263	-0.507832	-0.322819	-0.385284	-0.324726	-0.405788	0.0600815	-0.079155
5.75783	-0.999927	-0.383377	-0.553131	-0.37384	-0.435352	-0.371933	-0.455379	-0.0023842	-0.140667
5.7645	-1.03235	-0.431061	-0.59557	-0.422955	-0.48399	-0.41914	-0.504971	-0.0638962	-0.198364
5.77117	-1.06287	-0.475407	-0.636578	-0.469208	-0.530243	-0.465393	-0.554085	-0.123501	-0.252724
5.77783	-1.09196	-0.516891	-0.675678	-0.513554	-0.575066	-0.509739	-0.600815	-0.179291	-0.306129
5.7845	-1.11961	-0.556946	-0.712395	-0.555992	-0.619412	-0.552177	-0.644207	-0.231743	-0.358105
5.79117	-1.14489	-0.597	-0.747681	-0.597477	-0.66185	-0.592232	-0.685692	-0.281811	-0.407696
5.79783	-1.16825	-0.636101	-0.78249	-0.637531	-0.702858	-0.630856	-0.7267	-0.329495	-0.453949
5.8045	-1.19209	-0.673771	-0.816822	-0.677109	-0.741959	-0.666618	-0.766754	-0.374794	-0.499248
5.81117	-1.21641	-0.71001	-0.849247	-0.715733	-0.780582	-0.701427	-0.804901	-0.416756	-0.543118
5.81783	-1.24025	-0.745297	-0.880241	-0.753403	-0.818729	-0.73719	-0.841618	-0.457287	-0.584125
5.8245	-1.2641	-0.779152	-0.910282	-0.790119	-0.855446	-0.771999	-0.87595	-0.497341	-0.623703
5.83117	-1.28746	-0.810623	-0.9408	-0.825882	-0.891209	-0.804424	-0.908375	-0.538349	-0.66185
5.83783	-1.31035	-0.83971	-0.970364	-0.860691	-0.925064	-0.834942	-0.938415	-0.578403	-0.699043
5.8445	-1.33181	-0.868321	-0.999927	-0.89407	-0.957966	-0.864983	-0.968456	-0.617981	-0.734329
5.85117	-1.35136	-0.897884	-1.02949	-0.926018	-0.98896	-0.89407	-0.996113	-0.656605	-0.767231
5.85783	-1.36995	-0.926971	-1.0581	-0.957012	-1.01805	-0.921249	-1.02282	-0.694752	-0.798702
5.8645	-1.38664	-0.956535	-1.08528	-0.986099	-1.0457	-0.946522	-1.04713	-0.730991	-0.828266
5.87117	-1.40285	-0.986576	-1.11055	-1.01376	-1.07241	-0.971317	-1.07241	-0.765324	-0.85783
5.87783	-1.41859	-1.01423	-1.1344	-1.04094	-1.09911	-0.995636	-1.09673	-0.796318	-0.887871
5.8845	-1.43385	-1.04046	-1.15681	-1.06716	-1.12534	-1.01852	-1.11961	-0.824928	-0.917435
5.89117	-1.44958	-1.06382	-1.17779	-1.091	-1.15061	-1.03998	-1.14059	-0.852585	-0.946045
5.89783	-1.46532	-1.08624	-1.19686	-1.11437	-1.1754	-1.06192	-1.16158	-0.880718	-0.974178
5.9045	-1.48058	-1.10674	-1.21498	-1.13869	-1.2002	-1.08528	-1.18399	-0.907898	-1.00231
5.91117	-1.49488	-1.12677	-1.23405	-1.16253	-1.22499	-1.10865	-1.2064	-0.934124	-1.02949
5.91783	-1.50776	-1.14727	-1.25217	-1.18542	-1.24836	-1.13058	-1.22833	-0.96035	-1.05476
5.9245	-1.52063	-1.16777	-1.26791	-1.2064	-1.26982	-1.15204	-1.25074	-0.98753	-1.07956
5.93117	-1.53255	-1.1878	-1.28269	-1.22595	-1.28984	-1.17254	-1.27363	-1.01471	-1.1034
5.93783	-1.54304	-1.20592	-1.29747	-1.24359	-1.30844	-1.19209	-1.29652	-1.03998	-1.12677
5.9445	-1.55258	-1.22309	-1.31226	-1.26028	-1.32608	-1.21069	-1.31798	-1.06239	-1.14918
5.95117	-1.56307	-1.23882	-1.32561	-1.27649	-1.34182	-1.22833	-1.33848	-1.08385	-1.17111
5.95783	-1.57309	-1.25408	-1.33991	-1.29366	-1.35803	-1.2455	-1.35803	-1.10483	-1.19162
5.9645	-1.58262	-1.26791	-1.35565	-1.31178	-1.3752	-1.26314	-1.37758	-1.12534	-1.21164
5.97117	-1.59311	-1.28126	-1.37234	-1.33085	-1.39332	-1.28126	-1.39713	-1.14584	-1.23215
5.97783	-1.60551	-1.29557	-1.38855	-1.34945	-1.41096	-1.29986	-1.41668	-1.16539	-1.25217
5.9845	-1.61934	-1.3113	-1.40572	-1.36757	-1.42813	-1.31798	-1.43576	-1.18542	-1.2722
5.99117	-1.63317	-1.32799	-1.42336	-1.38378	-1.44625	-1.3361	-1.4534	-1.20592	-1.29223
5.99783	-1.64795	-1.34468	-1.441	-1.39999	-1.46484	-1.35374	-1.47009	-1.2269	-1.31321
6.0045	-1.66178	-1.36232	-1.45769	-1.41621	-1.48296	-1.37091	-1.48487	-1.24741	-1.33276
6.01117	-1.67513	-1.38092	-1.47343	-1.4329	-1.50061	-1.38855	-1.49918	-1.26791	-1.35088
6.01783	-1.68705	-1.39999	-1.48869	-1.45054	-1.51825	-1.40619	-1.513	-1.28937	-1.37043
6.0245	-1.69897	-1.41716	-1.5049	-1.46818	-1.53637	-1.42431	-1.52779	-1.31083	-1.39093
6.03117	-1.71041	-1.43337	-1.52206	-1.4863	-1.55354	-1.44291	-1.544	-1.33181	-1.41191
6.03783	-1.72091	-1.44768	-1.53971	-1.50442	-1.56975	-1.46341	-1.56212	-1.35231	-1.43147
6.0445	-1.73092	-1.46198	-1.55735	-1.52111	-1.58501	-1.48344	-1.58119	-1.37329	-1.45149
6.05117	-1.74093	-1.47533	-1.57499	-1.53685	-1.59979	-1.50156	-1.60074	-1.39332	-1.47104
6.05783	-1.75047	-1.48869	-1.59311	-1.5521	-1.61409	-1.51968	-1.61839	-1.41335	-1.49012
6.0645	-1.76048	-1.50156	-1.60885	-1.56784	-1.6284	-1.53637	-1.63412	-1.43194	-1.50824
6.07117	-1.7705	-1.51539	-1.62268	-1.5831	-1.64366	-1.55258	-1.64747	-1.44958	-1.52493
6.07783	-1.78146	-1.52969	-1.63507	-1.59693	-1.65892	-1.56689	-1.65892	-1.46675	-1.54209
6.0845	-1.79243	-1.54352	-1.64556	-1.60933	-1.6737	-1.57976	-1.66893	-1.48344	-1.55926
6.09117	-1.8034	-1.55544	-1.65558	-1.62268	-1.68848	-1.59311	-1.67751	-1.49822	-1.57642
6.09783	-1.81389	-1.56641	-1.66559	-1.63555	-1.70279	-1.60646	-1.6861	-1.51157	-1.59216
6.1045	-1.82438	-1.57642	-1.67513	-1.64747	-1.71661	-1.62029	-1.69563	-1.52397	-1.60599
6.11117	-1.83439	-1.58691	-1.68514	-1.65844	-1.72997	-1.63507	-1.70708	-1.53685	-1.61743
6.11783	-1.84488	-1.59836	-1.69659	-1.66988	-1.74284	-1.65224	-1.72091	-1.54972	-1.6284
6.1245	-1.85585	-1.61123	-1.70803	-1.68228	-1.75524	-1.66988	-1.73616	-1.5626	-1.63889
6.13117	-1.86825	-1.62506	-1.71947	-1.69516	-1.76716	-1.68753	-1.75381	-1.5769	-1.65033
6.13783	-1.88208	-1.64127	-1.73235	-1.70851	-1.78051	-1.70469	-1.77193	-1.59359	-1.66368
6.1445	-1.8959	-1.65892	-1.74713	-1.72186	-1.79482	-1.72091	-1.78957	-1.61266	-1.67847
6.15117	-1.9083	-1.67561	-1.76191	-1.73664	-1.8096	-1.73569	-1.80483	-1.63174	-1.69563
6.15783	-1.92022	-1.69134	-1.77574	-1.75142	-1.82486	-1.74809	-1.8177	-1.64986	-1.71471
6.1645	-1.93119	-1.70517	-1.78957	-1.76716	-1.83916	-1.76001	-1.83058	-1.66702	-1.73426
6.17117	-1.94168	-1.71852	-1.8034	-1.78289	-1.85347	-1.77193	-1.84345	-1.68228	-1.75095
6.17783	-1.95217	-1.73092	-1.81627	-1.7972	-1.86586	-1.78385	-1.85585	-1.69516	-1.76573
6.1845	-1.96314	-1.74284	-1.82772	-1.8115	-1.8754	-1.79529	-1.8692	-1.7066	-1.77908
6.19117	-1.97458	-1.75333	-1.83821	-1.82486	-1.88255	-1.80578	-1.88398	-1.71709	-1.79005
6.19783	-1.9865	-1.76287	-1.84965	-1.83821	-1.89209	-1.81532	-1.89924	-1.72949	-1.80101
6.2045	-1.99747	-1.77336	-1.86205	-1.84917	-1.90306	-1.82438	-1.91307	-1.74332	-1.81246
6.21117	-2.00844	-1.78432	-1.87588	-1.8611	-1.91641	-1.83439	-1.92547	-1.75858	-1.82533
6.21783	-2.01797	-1.79577	-1.89018	-1.87445	-1.92976	-1.84441	-1.93739	-1.77288	-1.83868
6.2245	-2.02703	-1.80674	-1.90401	-1.88971	-1.94502	-1.85537	-1.94883	-1.78576	-1.85251
6.23117	-2.03562	-1.81818	-1.91641	-1.90496	-1.96075	-1.86729	-1.95932	-1.79911	-1.86586
6.23783	-2.04563	-1.82962	-1.92881	-1.91975	-1.97363	-1.88065	-1.96934	-1.81198	-1.87874
6.2445	-2.05565	-1.84107	-1.9412	-1.93501	-1.9846	-1.89447	-1.9803	-1.82533	-1.88971
6.25117	-2.06518	-1.85251	-1.95312	-1.94883	-1.99461	-1.90687	-1.9908	-1.83821	-1.89972
6.25783	-2.07424	-1.86396	-1.96457	-1.96075	-2.00462	-1.91736	-2.00176	-1.85108	-1.90926
6.2645	-2.08282	-1.87492	-1.97649	-1.97077	-2.01368	-1.9269	-2.01368	-1.86491	-1.91879
6.27117	-2.09093	-1.88637	-1.98889	-1.98078	-2.0237	-1.93501	-2.0256	-1.87922	-1.92833
6.27783	-2.09999	-1.89781	-2.00033	-1.9908	-2.03562	-1.94407	-2.03705	-1.89209	-1.93977
6.2845	-2.10905	-1.90783	-2.00987	-1.99985	-2.04849	-1.95265	-2.04706	-1.90258	-1.95122
6.29117	-2.11763	-1.91593	-2.01702	-2.00891	-2.06184	-1.96028	-2.05565	-1.91164	-1.96171
6.29783	-2.12431	-1.92356	-2.02179	-2.0175	-2.07376	-1.96695	-2.06184	-1.92022	-1.97124
6.3045	-2.1286	-1.92976	-2.02513	-2.0256	-2.08473	-1.97268	-2.06566	-1.92881	-1.98078
6.31117	-2.13051	-1.93501	-2.02751	-2.03133	-2.09236	-1.97887	-2.06804	-1.93453	-1.98746
6.31783	-2.13051	-1.93787	-2.02942	-2.03466	-2.09665	-1.98317	-2.07043	-1.93787	-1.9927
6.3245	-2.13051	-1.94073	-2.03037	-2.038	-2.09904	-1.98603	-2.07281	-1.93977	-1.99652
6.33117	-2.13194	-1.94359	-2.03228	-2.04229	-2.09999	-1.98793	-2.0752	-1.94168	-1.99938
6.33783	-2.13623	-1.94645	-2.03705	-2.04706	-2.10094	-1.99032	-2.07949	-1.94311	-2.00033
6.3445	-2.14338	-1.94979	-2.04468	-2.05278	-2.1019	-1.99413	-2.08569	-1.94502	-2.00081
6.35117	-2.15292	-1.95503	-2.05565	-2.05994	-2.10524	-1.99985	-2.09332	-1.94979	-2.00319
6.35783	-2.16293	-1.96266	-2.069	-2.06852	-2.11143	-2.00605	-2.10237	-1.95837	-2.00701

## Sheet: Fig5A_inset
time (s)	ADPR (µM)	NAD+ (µM)	nicotinamide (µM)
0	0	209	0
10	0.9	176	9.6
25	1.6	162	21.6
50	3	148	37.6
120	5.5	114	85

## Sheet: Fig5B
		ADPR (percent)
Nuc165		0.07	0.065	0.053
Nuc165/HPF1		0.29	0.25	0.165
Nuc165/E284A		0.1	0.12	0.08
p18mer		0.036	0.019	0.026
p18mer/HPF1		0.07	0.054	0.037
p18mer/E284A		0.061	0.024	0.031

## Sheet: Fig5C
		AMP-PR (uM)
Nuc165		165.2	131.4	201	151.4	194.4	201.3	180.6
Nuc165/HPF1		17.4	19.5	17.5	17.1	17.4	17.3	18.1	20.4
Nuc165/E284A		15.3	13.2	14.2	10.7	12.7	17.4
p18mer/E284A		212.8	210.4	161.1	165.2
p18mer/HPF1		43.3	48.2	42.9	44.8	39.8
p18mer/E284A		38.6	36.3	36.3	41.5	44.8	46.2

## Sheet: Fig5D
top = percent treadmilling
H3 peptide (µM)	-HPF1				+HPF1
0	7.3	3.8	7.1	3.2	80.4	60.3	61.1	60.2
24	10.3	4.9	5	3.3	44.7	44.2	35	38.6
48	8.9	3.8	6.5	2.1	31	33.9	17.9	21.5
96	15.6	3.2	8.4	3.8	16.7	16.1	8.1	10.7
144	8.7	6.5	8		12.6	11.3	7.1	6.8
240	7	5.8	4.7	5.8	7.2	8.3	7.2	7.3
bottom = total activity as measured by nicotinaamide formation
H3 peptide (µM)	-HPF1				+HPF1
0	9	7.7	5.7	5.2	22.6	23.7	17.6	17.9
24	9.8	7.6	5.8	5.7	28.5	22.7	20.4	20.8
48	10.5	7.7	6.3	6.4	30.1	24.8	24.1	24.2
96	10.9	10.2	6.8	7.6	35.8	29.4	27.2	28.2
144	12	9.6	7.9	10.1	38.3	31.2	28.7	29.1
240	13.3	10.3	8.3	8	39.9	31.6	28.5	28
