# Supplementary material for: HPF1 and nucleosomes mediate a dramatic switch in activity of PARP1 from polymerase to hydrolase
Source: eLife. 2021 Mar 8;10:e65773. doi: 10.7554/eLife.65773 (PMC8012059; doi:10.7554/eLife.65773)
Supplement: Figure 6—source data 1. [file elife-65773-fig6-data1.xlsx]

## Sheet: Fig6B
time (min)	0 s	7 s	15 s	25 s	50 s	120 s	300 s	1200 s	3600 s
-0.0355	-1.70469	-1.64843	-1.55735	-1.6737	-1.70708	-1.61886	-1.67894	-1.66035	-1.57356
-0.0288333	-1.70374	-1.64461	-1.55687	-1.67608	-1.70898	-1.61934	-1.68371	-1.65606	-1.57166
-0.0221667	-1.70326	-1.64032	-1.55973	-1.67847	-1.70994	-1.62125	-1.68943	-1.65272	-1.57118
-0.0155	-1.70231	-1.63651	-1.56546	-1.68085	-1.71041	-1.62268	-1.69468	-1.6489	-1.5707
-0.0088333	-1.69992	-1.63317	-1.57022	-1.68276	-1.70994	-1.62315	-1.69706	-1.64413	-1.57022
-0.0021667	-1.69516	-1.62983	-1.57213	-1.68514	-1.70946	-1.62363	-1.69802	-1.63841	-1.56975
0.0045	-1.68943	-1.62601	-1.57309	-1.688	-1.70851	-1.62363	-1.69754	-1.63221	-1.56879
0.0111667	-1.68228	-1.62077	-1.57452	-1.69039	-1.70708	-1.62268	-1.69563	-1.62697	-1.56736
0.0178333	-1.67274	-1.61505	-1.57499	-1.69039	-1.70422	-1.62029	-1.69182	-1.61934	-1.56307
0.0245	-1.66225	-1.61028	-1.57261	-1.68753	-1.70135	-1.616	-1.688	-1.60837	-1.5583
0.0311667	-1.65129	-1.60599	-1.57022	-1.68371	-1.69849	-1.61219	-1.68514	-1.59693	-1.55354
0.0378333	-1.6408	-1.6017	-1.57166	-1.68085	-1.69563	-1.60933	-1.68371	-1.58787	-1.5502
0.0445	-1.63126	-1.59884	-1.57595	-1.67942	-1.69277	-1.60837	-1.68276	-1.58024	-1.54734
0.0511667	-1.62363	-1.59788	-1.58072	-1.67799	-1.69039	-1.60885	-1.68133	-1.57213	-1.54591
0.0578333	-1.61839	-1.59788	-1.58501	-1.67561	-1.68896	-1.61028	-1.6799	-1.56593	-1.54686
0.0645	-1.61505	-1.59836	-1.59073	-1.67513	-1.68896	-1.61266	-1.67847	-1.56403	-1.54924
0.0711667	-1.61314	-1.59979	-1.59788	-1.67513	-1.68943	-1.61648	-1.67704	-1.56498	-1.55306
0.0778333	-1.61171	-1.6017	-1.60408	-1.67465	-1.68991	-1.62172	-1.67513	-1.56593	-1.55735
0.0845	-1.61123	-1.60456	-1.60933	-1.67322	-1.69086	-1.62697	-1.67418	-1.56689	-1.56355
0.0911667	-1.61028	-1.60885	-1.61505	-1.67084	-1.6923	-1.63078	-1.6737	-1.56927	-1.5707
0.0978333	-1.60885	-1.61648	-1.62125	-1.67131	-1.69373	-1.63507	-1.67322	-1.57309	-1.57738
0.1045	-1.60789	-1.62601	-1.6284	-1.67227	-1.69516	-1.63937	-1.67274	-1.5769	-1.58548
0.111167	-1.60646	-1.63507	-1.63507	-1.67274	-1.69611	-1.64318	-1.67179	-1.58072	-1.59407
0.117833	-1.60456	-1.64413	-1.64175	-1.67227	-1.69754	-1.64604	-1.67036	-1.58453	-1.60265
0.1245	-1.60313	-1.65176	-1.64843	-1.67322	-1.69897	-1.647	-1.66798	-1.58882	-1.61076
0.131167	-1.60313	-1.65796	-1.6551	-1.67561	-1.70088	-1.64795	-1.66512	-1.59311	-1.61743
0.137833	-1.60408	-1.66178	-1.66035	-1.67704	-1.70088	-1.64938	-1.66178	-1.59597	-1.62458
0.1445	-1.60599	-1.66559	-1.66559	-1.67608	-1.7004	-1.65176	-1.65796	-1.59836	-1.63031
0.151167	-1.60789	-1.67036	-1.66988	-1.67513	-1.69945	-1.6551	-1.65224	-1.60122	-1.63507
0.157833	-1.61123	-1.67608	-1.67227	-1.67465	-1.69897	-1.65796	-1.64604	-1.60551	-1.63937
0.1645	-1.61552	-1.68371	-1.6737	-1.67465	-1.69897	-1.66225	-1.64032	-1.61028	-1.64413
0.171167	-1.62029	-1.6923	-1.67513	-1.6737	-1.69897	-1.66655	-1.63507	-1.61505	-1.64938
0.177833	-1.62506	-1.7004	-1.67704	-1.67322	-1.69945	-1.67036	-1.63031	-1.61982	-1.65462
0.1845	-1.62983	-1.70755	-1.67751	-1.6737	-1.7004	-1.67227	-1.62554	-1.62649	-1.65796
0.191167	-1.63507	-1.71375	-1.67751	-1.67513	-1.70135	-1.67274	-1.61982	-1.63317	-1.66035
0.197833	-1.64127	-1.719	-1.67847	-1.67847	-1.70088	-1.67274	-1.61505	-1.64032	-1.6613
0.2045	-1.64747	-1.72234	-1.6799	-1.68133	-1.69992	-1.67274	-1.61123	-1.647	-1.6613
0.211167	-1.65224	-1.72329	-1.68133	-1.68276	-1.69897	-1.67227	-1.60837	-1.65319	-1.66035
0.217833	-1.65796	-1.72377	-1.68085	-1.68324	-1.69802	-1.67131	-1.60551	-1.66035	-1.66035
0.2245	-1.66368	-1.72424	-1.68085	-1.68419	-1.69706	-1.66988	-1.6036	-1.66655	-1.66178
0.231167	-1.67084	-1.72567	-1.68133	-1.68562	-1.69611	-1.66941	-1.60265	-1.67084	-1.66368
0.237833	-1.67704	-1.72663	-1.68324	-1.68705	-1.69563	-1.66702	-1.60265	-1.67465	-1.66655
0.2445	-1.68276	-1.72758	-1.68419	-1.688	-1.6942	-1.66416	-1.60265	-1.67894	-1.66941
0.251167	-1.688	-1.72901	-1.68514	-1.69086	-1.6923	-1.65987	-1.60074	-1.68419	-1.67131
0.257833	-1.69325	-1.73092	-1.68753	-1.69468	-1.68991	-1.65558	-1.59884	-1.68943	-1.67179
0.2645	-1.69849	-1.73235	-1.69039	-1.69849	-1.68705	-1.65081	-1.59693	-1.6942	-1.67179
0.271167	-1.70374	-1.73235	-1.69373	-1.70135	-1.68324	-1.64461	-1.59645	-1.69849	-1.67227
0.277833	-1.70851	-1.73092	-1.69611	-1.70422	-1.67942	-1.63794	-1.59645	-1.70231	-1.67227
0.2845	-1.71375	-1.72997	-1.69659	-1.70755	-1.67561	-1.63078	-1.5974	-1.70517	-1.67227
0.291167	-1.719	-1.72901	-1.69659	-1.70994	-1.67227	-1.62315	-1.59884	-1.70612	-1.67131
0.297833	-1.72424	-1.7271	-1.69563	-1.71423	-1.66941	-1.616	-1.59979	-1.70612	-1.67036
0.3045	-1.72901	-1.72472	-1.69373	-1.71852	-1.66702	-1.61076	-1.60217	-1.7066	-1.66798
0.311167	-1.73283	-1.72329	-1.69134	-1.72234	-1.66512	-1.60551	-1.60503	-1.70755	-1.66416
0.317833	-1.73712	-1.72329	-1.68943	-1.72472	-1.66225	-1.60217	-1.60837	-1.70898	-1.66082
0.3245	-1.73998	-1.72377	-1.69039	-1.72615	-1.65844	-1.59884	-1.61171	-1.70946	-1.65939
0.331167	-1.74189	-1.72472	-1.6923	-1.7271	-1.65224	-1.59693	-1.61457	-1.70994	-1.65939
0.337833	-1.74379	-1.72472	-1.69516	-1.72663	-1.64509	-1.59454	-1.61743	-1.71041	-1.66035
0.3445	-1.74618	-1.72377	-1.69849	-1.7252	-1.63698	-1.59073	-1.62125	-1.71185	-1.6613
0.351167	-1.74761	-1.72186	-1.70183	-1.72329	-1.62888	-1.58739	-1.62506	-1.71232	-1.66321
0.357833	-1.74761	-1.72043	-1.70422	-1.72329	-1.6222	-1.5831	-1.6284	-1.7128	-1.66464
0.3645	-1.74761	-1.71852	-1.70517	-1.72377	-1.61648	-1.57976	-1.63269	-1.71328	-1.66702
0.371167	-1.74856	-1.71757	-1.70469	-1.72424	-1.61171	-1.5769	-1.63841	-1.71375	-1.66893
0.377833	-1.74904	-1.71709	-1.70469	-1.72472	-1.60837	-1.57595	-1.64509	-1.71328	-1.67036
0.3845	-1.74856	-1.71757	-1.70469	-1.7252	-1.60456	-1.57547	-1.65224	-1.71137	-1.67131
0.391167	-1.74665	-1.71852	-1.70469	-1.72567	-1.59979	-1.57595	-1.65939	-1.70851	-1.67322
0.397833	-1.74379	-1.719	-1.70469	-1.72567	-1.59359	-1.5769	-1.66607	-1.70517	-1.67418
0.4045	-1.74093	-1.71995	-1.70612	-1.72424	-1.58691	-1.57976	-1.67179	-1.70279	-1.67465
0.411167	-1.73855	-1.72091	-1.70708	-1.72091	-1.58167	-1.58262	-1.67608	-1.70135	-1.67561
0.417833	-1.73664	-1.72138	-1.70755	-1.71709	-1.57785	-1.58691	-1.67942	-1.70088	-1.67704
0.4245	-1.73426	-1.72234	-1.70803	-1.71137	-1.57595	-1.59168	-1.68324	-1.7004	-1.67847
0.431167	-1.73378	-1.72377	-1.70803	-1.70517	-1.57547	-1.5974	-1.68562	-1.69992	-1.67942
0.437833	-1.73473	-1.72567	-1.70803	-1.69802	-1.57738	-1.6036	-1.68753	-1.69897	-1.67894
0.4445	-1.73616	-1.72663	-1.70803	-1.68896	-1.57976	-1.6098	-1.68943	-1.69849	-1.67751
0.451167	-1.73569	-1.7271	-1.70898	-1.67942	-1.58167	-1.61552	-1.6923	-1.69897	-1.67561
0.457833	-1.73426	-1.7271	-1.71089	-1.67131	-1.58405	-1.62125	-1.69516	-1.69992	-1.67465
0.4645	-1.73378	-1.72806	-1.71232	-1.66512	-1.58691	-1.62745	-1.69611	-1.70135	-1.67418
0.471167	-1.73378	-1.72997	-1.71232	-1.65987	-1.59025	-1.63269	-1.69659	-1.70326	-1.67608
0.477833	-1.73283	-1.73187	-1.71041	-1.6551	-1.59264	-1.63794	-1.69802	-1.70422	-1.67894
0.4845	-1.73235	-1.7333	-1.70708	-1.65272	-1.5955	-1.6427	-1.69992	-1.70469	-1.68324
0.491167	-1.73283	-1.73569	-1.70231	-1.65129	-1.60074	-1.647	-1.7004	-1.70469	-1.68657
0.497833	-1.73378	-1.73807	-1.69611	-1.6489	-1.60646	-1.65129	-1.7004	-1.70565	-1.68896
0.5045	-1.73283	-1.74046	-1.69039	-1.64461	-1.61266	-1.65653	-1.70135	-1.70755	-1.69086
0.511167	-1.73092	-1.74141	-1.6861	-1.63984	-1.61886	-1.66178	-1.70231	-1.70994	-1.69134
0.517833	-1.72997	-1.74236	-1.68371	-1.63555	-1.62506	-1.66655	-1.70183	-1.7128	-1.69039
0.5245	-1.72949	-1.74379	-1.68324	-1.63269	-1.63221	-1.67036	-1.69897	-1.71471	-1.68896
0.531167	-1.72949	-1.7457	-1.68276	-1.63031	-1.63841	-1.67322	-1.69563	-1.71471	-1.688
0.537833	-1.72997	-1.74665	-1.6818	-1.6284	-1.64366	-1.67465	-1.69182	-1.71375	-1.688
0.5445	-1.7314	-1.74618	-1.68085	-1.62601	-1.6489	-1.67465	-1.68753	-1.7128	-1.68848
0.551167	-1.73283	-1.74379	-1.67847	-1.62411	-1.65319	-1.67465	-1.68419	-1.71328	-1.68848
0.557833	-1.73283	-1.74046	-1.67418	-1.62172	-1.65844	-1.67608	-1.68276	-1.71518	-1.68896
0.5645	-1.73187	-1.73616	-1.66893	-1.61982	-1.66321	-1.67799	-1.68324	-1.71804	-1.688
0.571167	-1.73044	-1.73187	-1.66416	-1.61791	-1.66702	-1.68037	-1.68467	-1.72091	-1.68514
0.577833	-1.72853	-1.72758	-1.65987	-1.61743	-1.67036	-1.68324	-1.68657	-1.72281	-1.68085
0.5845	-1.72806	-1.72377	-1.65462	-1.61934	-1.67418	-1.68514	-1.68896	-1.72472	-1.67608
0.591167	-1.72901	-1.71947	-1.6489	-1.62363	-1.67847	-1.6861	-1.69086	-1.7252	-1.66988
0.597833	-1.73092	-1.71661	-1.6427	-1.6284	-1.68324	-1.6861	-1.69039	-1.72424	-1.66273
0.6045	-1.73283	-1.71471	-1.63651	-1.63364	-1.68753	-1.68467	-1.68991	-1.72186	-1.65606
0.611167	-1.73426	-1.71328	-1.62935	-1.63937	-1.69086	-1.68371	-1.68943	-1.71995	-1.65033
0.617833	-1.73521	-1.71089	-1.6222	-1.64652	-1.69325	-1.68371	-1.68896	-1.71804	-1.64461
0.6245	-1.73616	-1.7066	-1.61552	-1.65272	-1.69516	-1.68467	-1.68896	-1.71566	-1.63794
0.631167	-1.73664	-1.70088	-1.60885	-1.65796	-1.69754	-1.68562	-1.68943	-1.7128	-1.63126
0.637833	-1.73616	-1.69325	-1.60408	-1.66273	-1.69992	-1.68657	-1.69039	-1.71089	-1.62554
0.6445	-1.73616	-1.68419	-1.60027	-1.66845	-1.70183	-1.68753	-1.68991	-1.70994	-1.62077
0.651167	-1.73569	-1.67465	-1.59788	-1.67465	-1.70326	-1.68753	-1.68896	-1.70851	-1.61648
0.657833	-1.73426	-1.66655	-1.59597	-1.68037	-1.70565	-1.68657	-1.68753	-1.70755	-1.61314
0.6645	-1.7314	-1.66082	-1.59597	-1.68467	-1.70755	-1.68562	-1.6861	-1.7066	-1.61123
0.671167	-1.72758	-1.65796	-1.59836	-1.68896	-1.70898	-1.68467	-1.68467	-1.70422	-1.60933
0.677833	-1.72329	-1.6551	-1.60027	-1.69325	-1.71041	-1.68371	-1.68371	-1.69945	-1.60646
0.6845	-1.71804	-1.65224	-1.60217	-1.69706	-1.71185	-1.68276	-1.68276	-1.6923	-1.60313
0.691167	-1.71232	-1.6489	-1.60217	-1.70088	-1.71375	-1.6818	-1.68276	-1.68467	-1.59884
0.697833	-1.70803	-1.64461	-1.60313	-1.70469	-1.71423	-1.68037	-1.68324	-1.67656	-1.59454
0.7045	-1.70517	-1.64032	-1.60408	-1.70851	-1.71423	-1.67847	-1.68324	-1.66845	-1.59216
0.711167	-1.70279	-1.63555	-1.60456	-1.71328	-1.71328	-1.67608	-1.68276	-1.66082	-1.59168
0.717833	-1.7004	-1.63174	-1.60599	-1.71804	-1.7128	-1.67418	-1.6818	-1.6551	-1.59264
0.7245	-1.69706	-1.62983	-1.60789	-1.72234	-1.71185	-1.67322	-1.68133	-1.65129	-1.59216
0.731167	-1.69373	-1.62888	-1.61123	-1.7252	-1.71041	-1.6737	-1.68037	-1.647	-1.59121
0.737833	-1.68943	-1.6284	-1.61457	-1.72758	-1.70898	-1.67465	-1.67942	-1.64127	-1.59073
0.7445	-1.68324	-1.62745	-1.61839	-1.73044	-1.70803	-1.67561	-1.67799	-1.63412	-1.59025
0.751167	-1.67561	-1.62649	-1.62315	-1.73283	-1.70803	-1.67704	-1.67704	-1.62649	-1.59073
0.757833	-1.66893	-1.62601	-1.6284	-1.73378	-1.70803	-1.67799	-1.67561	-1.61839	-1.59216
0.7645	-1.66464	-1.62601	-1.63412	-1.73473	-1.70755	-1.67894	-1.67418	-1.61076	-1.59454
0.771167	-1.6613	-1.62601	-1.6408	-1.73616	-1.70708	-1.68085	-1.6737	-1.60503	-1.59884
0.777833	-1.65844	-1.62554	-1.64843	-1.73807	-1.70708	-1.6818	-1.67322	-1.60122	-1.60217
0.7845	-1.65462	-1.62506	-1.6551	-1.73903	-1.7066	-1.68133	-1.6737	-1.59884	-1.60599
0.791167	-1.65081	-1.62554	-1.66035	-1.7395	-1.70612	-1.68037	-1.67418	-1.59693	-1.60933
0.797833	-1.64652	-1.62649	-1.66655	-1.74093	-1.70708	-1.6799	-1.67418	-1.59645	-1.61409
0.8045	-1.64223	-1.62792	-1.67274	-1.74379	-1.70946	-1.68085	-1.67418	-1.59693	-1.62029
0.811167	-1.63698	-1.63078	-1.67799	-1.7457	-1.71375	-1.68228	-1.67418	-1.59836	-1.62649
0.817833	-1.63221	-1.63507	-1.68228	-1.74761	-1.71852	-1.68514	-1.67227	-1.59979	-1.63269
0.8245	-1.62745	-1.64127	-1.68657	-1.74952	-1.72329	-1.68705	-1.66845	-1.60265	-1.63937
0.831167	-1.62458	-1.6489	-1.69134	-1.75047	-1.72615	-1.68896	-1.66321	-1.60646	-1.64556
0.837833	-1.62315	-1.65558	-1.69516	-1.74999	-1.7271	-1.69086	-1.65653	-1.61076	-1.65033
0.8445	-1.62315	-1.66225	-1.69897	-1.74713	-1.72615	-1.69182	-1.65033	-1.61505	-1.65415
0.851167	-1.62268	-1.66845	-1.70231	-1.74427	-1.72424	-1.69277	-1.64413	-1.61982	-1.65749
0.857833	-1.62268	-1.67465	-1.70612	-1.74189	-1.72138	-1.69325	-1.63794	-1.62411	-1.6613
0.8645	-1.62506	-1.6818	-1.70946	-1.74141	-1.71804	-1.6942	-1.63174	-1.62935	-1.66607
0.871167	-1.62935	-1.68991	-1.71232	-1.74189	-1.71614	-1.69563	-1.62601	-1.6346	-1.67036
0.877833	-1.63412	-1.69849	-1.71423	-1.74284	-1.71423	-1.69754	-1.62125	-1.63984	-1.67418
0.8845	-1.63841	-1.70612	-1.71614	-1.74379	-1.71232	-1.69754	-1.61648	-1.64413	-1.67847
0.891167	-1.64413	-1.71185	-1.71804	-1.74427	-1.70994	-1.69611	-1.61123	-1.647	-1.68228
0.897833	-1.65129	-1.71709	-1.71947	-1.74332	-1.70851	-1.69373	-1.60551	-1.64938	-1.68514
0.9045	-1.65844	-1.71995	-1.72091	-1.74046	-1.70946	-1.69134	-1.60074	-1.65081	-1.68753
0.911167	-1.66416	-1.72091	-1.72138	-1.73759	-1.71041	-1.68896	-1.59645	-1.65367	-1.68991
0.917833	-1.66941	-1.72138	-1.72043	-1.73521	-1.71137	-1.6861	-1.59311	-1.65796	-1.69182
0.9245	-1.67418	-1.72281	-1.719	-1.7333	-1.71232	-1.68276	-1.58978	-1.66273	-1.69373
0.931167	-1.67942	-1.7252	-1.71804	-1.73235	-1.71328	-1.67942	-1.58739	-1.66893	-1.69659
0.937833	-1.68467	-1.72663	-1.71757	-1.73235	-1.71375	-1.67656	-1.58644	-1.67608	-1.69897
0.9445	-1.69039	-1.72806	-1.71757	-1.73235	-1.71375	-1.67322	-1.58548	-1.68324	-1.69945
0.951167	-1.69659	-1.72997	-1.71804	-1.73187	-1.71375	-1.66893	-1.58453	-1.68848	-1.69849
0.957833	-1.70231	-1.73283	-1.719	-1.72997	-1.7128	-1.66464	-1.58405	-1.69182	-1.69706
0.9645	-1.70708	-1.73569	-1.72043	-1.72901	-1.71185	-1.66035	-1.58453	-1.69563	-1.69706
0.971167	-1.71137	-1.73712	-1.72091	-1.72758	-1.71041	-1.6551	-1.58548	-1.7004	-1.69659
0.977833	-1.71471	-1.73807	-1.71995	-1.72615	-1.70851	-1.6489	-1.58596	-1.70612	-1.69516
0.9845	-1.71661	-1.73807	-1.71804	-1.72424	-1.70517	-1.64223	-1.58501	-1.71375	-1.69325
0.991167	-1.71852	-1.73807	-1.71518	-1.72329	-1.70088	-1.63507	-1.58453	-1.72472	-1.69277
0.997833	-1.72091	-1.73712	-1.71328	-1.72234	-1.69516	-1.62792	-1.58453	-1.74093	-1.69182
1.0045	-1.72329	-1.73569	-1.71089	-1.72043	-1.68991	-1.62125	-1.58548	-1.75953	-1.68943
1.01117	-1.72472	-1.73569	-1.70898	-1.71614	-1.68562	-1.616	-1.58739	-1.78003	-1.68705
1.01783	-1.72758	-1.73616	-1.70803	-1.70803	-1.6799	-1.61171	-1.59216	-1.80101	-1.68562
1.0245	-1.73044	-1.73712	-1.70898	-1.69468	-1.67322	-1.60694	-1.60122	-1.82009	-1.68562
1.03117	-1.73283	-1.73807	-1.70994	-1.67465	-1.66559	-1.60217	-1.61362	-1.83344	-1.6861
1.03783	-1.73712	-1.73903	-1.70994	-1.64747	-1.65653	-1.59836	-1.62983	-1.83916	-1.6861
1.0445	-1.74379	-1.73998	-1.70803	-1.61362	-1.64556	-1.59597	-1.64843	-1.83821	-1.68562
1.05117	-1.75333	-1.74093	-1.70469	-1.57595	-1.63221	-1.59311	-1.66988	-1.8301	-1.68467
1.05783	-1.76382	-1.74284	-1.69945	-1.53923	-1.616	-1.59121	-1.69373	-1.81532	-1.68228
1.0645	-1.77622	-1.7457	-1.69134	-1.50776	-1.59931	-1.59073	-1.71709	-1.79625	-1.67847
1.07117	-1.79052	-1.74904	-1.68133	-1.48439	-1.58548	-1.59264	-1.73712	-1.77526	-1.67227
1.07783	-1.80531	-1.75238	-1.66798	-1.47247	-1.57547	-1.59597	-1.75142	-1.75476	-1.66464
1.0845	-1.8177	-1.75381	-1.65033	-1.47486	-1.57022	-1.59979	-1.76048	-1.73616	-1.6551
1.09117	-1.82581	-1.75285	-1.62792	-1.49012	-1.57022	-1.60551	-1.76287	-1.71852	-1.6427
1.09783	-1.8301	-1.74761	-1.60408	-1.51491	-1.57642	-1.61552	-1.76001	-1.70326	-1.6284
1.1045	-1.82915	-1.73807	-1.57976	-1.54543	-1.58834	-1.62935	-1.75285	-1.68943	-1.61362
1.11117	-1.82247	-1.72377	-1.55783	-1.57881	-1.60408	-1.64556	-1.74522	-1.67847	-1.59836
1.11783	-1.81055	-1.70517	-1.54018	-1.61171	-1.61982	-1.66416	-1.73759	-1.66941	-1.58358
1.1245	-1.79529	-1.68419	-1.53017	-1.64127	-1.63412	-1.68228	-1.73044	-1.66035	-1.56975
1.13117	-1.77956	-1.66368	-1.52779	-1.66607	-1.647	-1.69706	-1.72377	-1.64986	-1.55687
1.13783	-1.76382	-1.64413	-1.53255	-1.68657	-1.65749	-1.70755	-1.71757	-1.63794	-1.54543
1.1445	-1.74809	-1.62745	-1.54161	-1.70326	-1.66512	-1.71328	-1.71232	-1.62649	-1.53542
1.15117	-1.73235	-1.61266	-1.55401	-1.71709	-1.66941	-1.71328	-1.70803	-1.61457	-1.52731
1.15783	-1.71757	-1.60074	-1.56832	-1.72806	-1.67179	-1.70851	-1.70565	-1.60265	-1.52206
1.1645	-1.70279	-1.59121	-1.58358	-1.73616	-1.67513	-1.70135	-1.70517	-1.59121	-1.52016
1.17117	-1.688	-1.58501	-1.59836	-1.74141	-1.67799	-1.69325	-1.70612	-1.58072	-1.52159
1.17783	-1.6737	-1.58024	-1.61171	-1.74522	-1.68085	-1.6861	-1.70755	-1.57213	-1.52636
1.1845	-1.66035	-1.5769	-1.62506	-1.74856	-1.68419	-1.67942	-1.70898	-1.56403	-1.53303
1.19117	-1.64938	-1.57547	-1.63746	-1.75142	-1.68848	-1.67465	-1.70946	-1.5564	-1.54161
1.19783	-1.64032	-1.5769	-1.64986	-1.75285	-1.6942	-1.67131	-1.70946	-1.5502	-1.5502
1.2045	-1.63269	-1.58119	-1.66416	-1.75238	-1.69897	-1.66941	-1.70755	-1.54686	-1.55783
1.21117	-1.62601	-1.58739	-1.67894	-1.75238	-1.70231	-1.6675	-1.70565	-1.54638	-1.56546
1.21783	-1.61934	-1.59407	-1.69277	-1.75095	-1.70612	-1.6675	-1.70374	-1.54734	-1.57356
1.2245	-1.61314	-1.60217	-1.70469	-1.74713	-1.70898	-1.6675	-1.70135	-1.55067	-1.58167
1.23117	-1.60551	-1.61123	-1.71471	-1.74141	-1.71137	-1.6675	-1.69945	-1.55449	-1.59025
1.23783	-1.59884	-1.62315	-1.72186	-1.73473	-1.71137	-1.66845	-1.69754	-1.5583	-1.59979
1.2445	-1.59264	-1.63412	-1.7252	-1.72853	-1.71089	-1.66988	-1.69563	-1.56116	-1.6098
1.25117	-1.58882	-1.64413	-1.7252	-1.72281	-1.70994	-1.67036	-1.69134	-1.56307	-1.62029
1.25783	-1.58548	-1.65319	-1.72281	-1.719	-1.70851	-1.67036	-1.68514	-1.56641	-1.63126
1.2645	-1.58405	-1.66321	-1.72186	-1.71852	-1.70803	-1.67084	-1.67847	-1.57118	-1.64175
1.27117	-1.58501	-1.67227	-1.72281	-1.71995	-1.70851	-1.67227	-1.67036	-1.57833	-1.65081
1.27783	-1.58834	-1.68037	-1.72567	-1.72329	-1.71137	-1.6737	-1.66225	-1.58691	-1.65987
1.2845	-1.59264	-1.688	-1.72949	-1.72567	-1.71566	-1.67561	-1.65367	-1.59645	-1.66941
1.29117	-1.5974	-1.69706	-1.73378	-1.72758	-1.719	-1.67751	-1.64509	-1.60742	-1.67894
1.29783	-1.6036	-1.70755	-1.73855	-1.72853	-1.72091	-1.67894	-1.63698	-1.61839	-1.68657
1.3045	-1.61028	-1.71661	-1.74189	-1.7271	-1.72234	-1.67847	-1.6284	-1.62745	-1.69373
1.31117	-1.61695	-1.72567	-1.74284	-1.72472	-1.72234	-1.67656	-1.61791	-1.63507	-1.70088
1.31783	-1.62315	-1.73473	-1.74093	-1.72281	-1.72186	-1.6737	-1.60599	-1.6427	-1.70708
1.3245	-1.63031	-1.74189	-1.73807	-1.72138	-1.72091	-1.66988	-1.59216	-1.65129	-1.71089
1.33117	-1.63746	-1.74665	-1.73521	-1.719	-1.72186	-1.66607	-1.57833	-1.66035	-1.71328
1.33783	-1.64461	-1.74904	-1.73378	-1.71661	-1.72424	-1.6613	-1.56498	-1.67036	-1.71471
1.3445	-1.65129	-1.74904	-1.7314	-1.71471	-1.72424	-1.65606	-1.55306	-1.6799	-1.71518
1.35117	-1.65749	-1.74665	-1.72806	-1.71375	-1.72186	-1.64938	-1.54304	-1.68896	-1.71232
1.35783	-1.66464	-1.74189	-1.72281	-1.7128	-1.71709	-1.64127	-1.53446	-1.69516	-1.70755
1.3645	-1.67227	-1.73569	-1.71661	-1.71185	-1.71328	-1.63364	-1.52779	-1.69897	-1.70231
1.37117	-1.67942	-1.72949	-1.70803	-1.71137	-1.70803	-1.62554	-1.52254	-1.70088	-1.69611
1.37783	-1.6861	-1.72281	-1.69802	-1.71137	-1.70183	-1.61791	-1.51777	-1.70088	-1.68753
1.3845	-1.6923	-1.71614	-1.688	-1.70898	-1.69563	-1.60885	-1.51348	-1.69897	-1.67561
1.39117	-1.69897	-1.70946	-1.67894	-1.70422	-1.68991	-1.59836	-1.50824	-1.69468	-1.6613
1.39783	-1.70565	-1.70422	-1.67227	-1.69754	-1.68324	-1.58691	-1.50442	-1.68896	-1.64413
1.4045	-1.71328	-1.69992	-1.6675	-1.69039	-1.67418	-1.57547	-1.50013	-1.68228	-1.6222
1.41117	-1.72281	-1.69849	-1.66655	-1.68419	-1.66416	-1.56546	-1.49632	-1.67608	-1.59454
1.41783	-1.73521	-1.7004	-1.66988	-1.67799	-1.65319	-1.55687	-1.49059	-1.66988	-1.55878
1.4245	-1.74809	-1.70469	-1.67608	-1.66845	-1.63746	-1.5502	-1.4782	-1.65939	-1.50681
1.43117	-1.75714	-1.70851	-1.68276	-1.64938	-1.60933	-1.54161	-1.45292	-1.63937	-1.42527
1.43783	-1.75714	-1.70755	-1.688	-1.61171	-1.56164	-1.52683	-1.40619	-1.60122	-1.29938
1.4445	-1.74284	-1.69659	-1.68705	-1.54543	-1.48964	-1.49965	-1.33419	-1.53589	-1.12391
1.45117	-1.7128	-1.6737	-1.67561	-1.44815	-1.39427	-1.45817	-1.2393	-1.44148	-0.905514
1.45783	-1.66655	-1.63794	-1.65081	-1.32561	-1.28317	-1.40524	-1.12915	-1.32465	-0.665665
1.4645	-1.61076	-1.59216	-1.61409	-1.19305	-1.17016	-1.34802	-1.01948	-1.19925	-0.434876
1.47117	-1.55401	-1.54018	-1.57166	-1.06812	-1.07002	-1.29223	-0.927925	-1.08242	-0.246525
1.47783	-1.5049	-1.48821	-1.52779	-0.968456	-0.998974	-1.24359	-0.868797	-0.991344	-0.126839
1.4845	-1.46914	-1.44053	-1.48678	-0.906944	-0.963211	-1.20592	-0.848293	-0.936031	-0.0891685
1.49117	-1.44672	-1.39809	-1.45197	-0.886917	-0.957966	-1.17874	-0.863552	-0.919342	-0.125408
1.49783	-1.42765	-1.35326	-1.42002	-0.898838	-0.965118	-1.15204	-0.897408	-0.930786	-0.209332
1.5045	-1.39046	-1.28603	-1.37663	-0.917435	-0.954151	-1.10388	-0.918865	-0.945568	-0.296116
1.51117	-1.30844	-1.1692	-1.29604	-0.909805	-0.891209	-1.00756	-0.888348	-0.926971	-0.335693
1.51783	-1.16014	-0.984669	-1.15395	-0.843525	-0.751019	-0.842571	-0.775814	-0.841618	-0.287533
1.5245	-0.944138	-0.731945	-0.939846	-0.701904	-0.531673	-0.610352	-0.573158	-0.67234	-0.137806
1.53117	-0.6814	-0.434399	-0.665188	-0.491619	-0.258923	-0.332356	-0.301838	-0.4282	0.0953674
1.53783	-0.411034	-0.133514	-0.361443	-0.241756	0.0214577	-0.04673	-0.0076294	-0.144005	0.36478
1.5445	-0.182152	0.117779	-0.0782013	0.00190735	0.253201	0.193596	0.25034	0.128269	0.607491
1.55117	-0.0495911	0.261784	0.128746	0.18549	0.376701	0.330925	0.407696	0.328064	0.755787
1.55783	-0.0753403	0.244617	0.202179	0.251293	0.330925	0.303268	0.401497	0.393391	0.738621
1.5645	-0.324726	0.0195503	0.0882149	0.139236	0.0638962	0.0553131	0.17643	0.262737	0.494003
1.57117	-0.842094	-0.436306	-0.252247	-0.198364	-0.446796	-0.43726	-0.294208	-0.107288	-0.0090599
1.57783	-1.60837	-1.08814	-0.821114	-0.768185	-1.16062	-1.13297	-0.97847	-0.713348	-0.734329
1.5845	-2.51436	-1.81675	-1.54829	-1.50013	-1.96218	-1.91545	-1.7705	-1.47915	-1.57118
1.59117	-3.3927	-2.43235	-2.29788	-2.25878	-2.69794	-2.62785	-2.52056	-2.26879	-2.35987
1.59783	-4.08697	-2.7318	-2.89822	-2.88391	-3.22247	-3.13091	-3.09038	-2.93112	-2.95258
1.6045	-4.50039	-2.60735	-3.2053	-3.25108	-3.46327	-3.36456	-3.41415	-3.35836	-3.27921
1.61117	-4.60529	-2.16866	-3.18956	-3.34454	-3.47614	-3.38984	-3.53956	-3.54052	-3.39842
1.61783	-4.43029	-1.72997	-2.99501	-3.27921	-3.42751	-3.35503	-3.6087	-3.58629	-3.47233
1.6245	-4.03357	-1.6098	-2.87008	-3.232	-3.46851	-3.37696	-3.74508	-3.6459	-3.63636
1.63117	-3.49331	-1.89781	-2.97546	-3.2897	-3.58105	-3.42798	-3.92532	-3.77226	-3.86906
1.63783	-2.90871	-2.388	-3.23105	-3.35979	-3.55005	-3.33071	-3.95536	-3.83615	-3.97062
1.6445	-2.41327	-2.67363	-3.32546	-3.22247	-3.10707	-2.89536	-3.59488	-3.59631	-3.685
1.65117	-2.13099	-2.3675	-2.91348	-2.68888	-2.20346	-2.12002	-2.77853	-2.90394	-2.8944
1.65783	-2.07996	-1.41573	-1.93357	-1.80054	-1.16014	-1.29795	-1.75858	-1.9002	-1.79338
1.6645	-2.12145	-0.263214	-0.775814	-0.900269	-0.494957	-0.871182	-1.00183	-1.00994	-0.858784
1.67117	-2.00987	0.380516	-0.0696182	-0.456333	-0.535965	-1.11532	-0.873089	-0.674248	-0.566006
1.67783	-1.52969	0.0486374	-0.235558	-0.723839	-1.16396	-1.90735	-1.35565	-1.02472	-1.04523
1.6845	-0.597954	-1.12867	-1.19019	-1.52445	-1.89304	-2.75469	-2.03323	-1.7643	-1.94788
1.69117	0.699997	-2.47765	-2.39515	-2.31314	-2.13671	-3.03268	-2.31695	-2.32792	-2.62642
1.69783	2.12955	-3.14474	-3.11136	-2.45523	-1.43814	-2.26355	-1.71947	-2.15483	-2.44713
1.7045	3.36075	-2.47765	-2.68936	-1.51253	0.352859	-0.346184	-0.0658035	-0.921249	-1.07384
1.71117	4.06218	-0.306606	-0.854492	0.547886	2.9335	2.35128	2.39134	1.29223	1.36042
1.71783	4.05455	2.93684	2.09332	3.2897	5.54991	5.08595	4.99344	3.95584	4.25625
1.7245	3.42083	6.30283	5.29814	5.92566	7.30276	7.02143	6.91748	6.24514	6.74868
1.73117	2.45523	8.69989	7.69997	7.63845	7.6704	7.63226	7.59649	7.43294	8.09622
1.73783	1.47486	9.48143	8.6174	7.98655	6.76346	6.94752	7.00998	7.28035	8.05044
1.7445	0.660896	8.73613	8.0657	7.09486	5.12362	5.44071	5.59568	6.08873	6.90269
1.75117	0.0395775	7.0529	6.56891	5.47409	3.32212	3.68309	3.9053	4.41647	5.20611
1.75783	-0.445843	5.0602	4.72975	3.67451	1.7252	2.0752	2.33221	2.74229	3.45325
1.7645	-0.862598	3.18336	2.97403	2.05708	0.490189	0.801563	1.06001	1.33324	1.93548
1.77117	-1.25217	1.6551	1.53875	0.780106	-0.373364	-0.109673	0.118732	0.274658	0.764847
1.77783	-1.6284	0.553131	0.503063	-0.141144	-0.938892	-0.716686	-0.544071	-0.462055	-0.0677109
1.7845	-1.98317	-0.168323	-0.176907	-0.768185	-1.29557	-1.10292	-1.00231	-0.948906	-0.632286
1.79117	-2.29979	-0.613213	-0.598908	-1.18256	-1.51205	-1.33896	-1.31607	-1.25885	-1.00422
1.79783	-2.55442	-0.87738	-0.854969	-1.45102	-1.63174	-1.47295	-1.5192	-1.44243	-1.23787
1.8045	-2.73085	-1.02901	-1.0066	-1.61457	-1.67942	-1.5316	-1.6284	-1.53017	-1.36423
1.81117	-2.82288	-1.11008	-1.09196	-1.69897	-1.66893	-1.53065	-1.65319	-1.53828	-1.39618
1.81783	-2.8367	-1.14536	-1.13297	-1.72043	-1.60885	-1.47724	-1.59693	-1.472	-1.33371
1.8245	-2.78473	-1.14727	-1.14393	-1.68991	-1.50537	-1.37329	-1.46055	-1.33276	-1.16968
1.83117	-2.67839	-1.12152	-1.1301	-1.61362	-1.36137	-1.21689	-1.24216	-1.11675	-0.898838
1.83783	-2.53201	-1.0705	-1.09386	-1.49345	-1.17588	-1.00422	-0.945091	-0.819206	-0.519752
1.8445	-2.36225	-0.994205	-1.03188	-1.33133	-0.948429	-0.734329	-0.582695	-0.437736	-0.0400543
1.85117	-2.18153	-0.891686	-0.937939	-1.12963	-0.682831	-0.414848	-0.177383	0.0243187	0.517368
1.85783	-1.99699	-0.76437	-0.80967	-0.89407	-0.386715	-0.0600815	0.238419	0.552177	1.11151
1.8645	-1.81198	-0.617981	-0.648022	-0.636101	-0.0743866	0.306606	0.627995	1.11771	1.68514
1.87117	-1.63078	-0.458717	-0.459194	-0.370503	0.236034	0.656605	0.950336	1.67847	2.17247
1.87783	-1.45817	-0.295639	-0.252247	-0.115395	0.522614	0.957966	1.17111	2.18487	2.51436
1.8845	-1.29604	-0.136375	-0.041008	0.109673	0.762939	1.18113	1.26839	2.58446	2.66981
1.89117	-1.14632	0.0109672	0.155926	0.290394	0.938892	1.30844	1.23978	2.83432	2.62308
1.89783	-1.01042	0.14019	0.324726	0.418663	1.04427	1.33562	1.10054	2.90966	2.38991
1.9045	-0.892162	0.246048	0.458717	0.495911	1.08147	1.27363	0.878334	2.80857	2.01178
1.91117	-0.789642	0.328541	0.556469	0.527859	1.06382	1.14441	0.607967	2.55537	1.54638
1.91783	-0.701904	0.39053	0.621796	0.526905	1.00565	0.976086	0.324249	2.18916	1.05381
1.9245	-0.627041	0.434875	0.66185	0.507832	0.924587	0.796795	0.0543594	1.75953	0.583649
1.93117	-0.563621	0.463963	0.687599	0.484943	0.837326	0.629425	-0.183106	1.31273	0.1688
1.93783	-0.512123	0.483036	0.705719	0.468731	0.757217	0.487804	-0.380516	0.889301	-0.174999
1.9445	-0.475407	0.496864	0.721455	0.464439	0.692368	0.376701	-0.537396	0.515461	-0.447273
1.95117	-0.526905	0.507832	0.736713	0.471592	0.645638	0.293732	-0.657558	0.200272	-0.657558
1.95783	-0.954151	0.515461	0.751972	0.488758	0.61655	0.23365	-0.748634	-0.0553131	-0.819683
1.9645	-2.1143	0.518322	0.766277	0.509739	0.601768	0.187874	-0.815868	-0.258923	-0.944138
1.97117	-3.98064	0.515461	0.776768	0.529289	0.591278	0.150204	-0.87595	-0.417709	-1.04189
1.97783	-5.93376	0.506401	0.782967	0.535488	0.518322	0.101566	-1.03092	-0.554085	-1.13153
1.9845	-7.20167	0.490189	0.785828	0.451565	0.223637	-0.0538826	-1.47486	-0.769138	-1.31178
1.99117	-7.39908	0.458241	0.770569	0.114441	-0.403881	-0.469208	-2.3036	-1.23644	-1.73855
1.99783	-6.44112	0.370502	0.680447	-0.56839	-1.22786	-1.17636	-3.31402	-2.01988	-2.4538
2.0045	-4.30584	0.195503	0.464916	-1.42908	-1.86729	-1.93739	-4.07696	-2.90537	-3.23915
2.01117	-1.22595	-0.043869	0.163555	-2.07615	-2.00033	-2.37465	-4.25243	-3.48997	-3.72696
2.01783	2.04039	-0.273705	-0.101566	-2.19917	-1.5769	-2.28548	-3.73507	-3.50332	-3.69167
2.0245	4.55427	-0.434876	-0.240803	-1.75095	-0.715733	-1.71137	-2.57874	-2.92969	-3.12996
2.03117	5.83744	-0.516415	-0.256538	-0.837326	0.415325	-0.782013	-0.983715	-1.88875	-2.14243
2.03783	6.02531	-0.506878	-0.164986	0.36335	1.5626	0.332832	0.660896	-0.56982	-0.901699
2.0445	5.5027	-0.403404	0.0333786	1.56355	2.35891	1.34993	1.88446	0.710964	0.294685
2.05117	4.5619	-0.247002	0.279427	2.38132	2.53582	1.92308	2.39563	1.56498	1.091
2.05783	3.407	-0.120163	0.450134	2.56157	2.14481	1.90401	2.2316	1.77383	1.3051
2.0645	2.25067	-0.0810623	0.459671	2.17056	1.4863	1.45626	1.66607	1.44482	1.04856
2.07117	1.28555	-0.127315	0.331402	1.50442	0.853539	0.881195	1.01376	0.884056	0.592232
2.07783	0.594139	-0.227928	0.144005	0.855446	0.371933	0.391006	0.472546	0.355721	0.161648
2.0845	0.132561	-0.352859	-0.0491142	0.356197	0.0314712	0.0391007	0.0925064	-0.0357628	-0.158787
2.09117	-0.178337	-0.480175	-0.223637	0.00333786	-0.211716	-0.204563	-0.162602	-0.303268	-0.381947
2.09783	-0.399113	-0.597954	-0.374794	-0.246525	-0.393391	-0.377655	-0.338077	-0.489235	-0.537872
2.1045	-0.566482	-0.703812	-0.504971	-0.429153	-0.535965	-0.506878	-0.464916	-0.624657	-0.649929
2.11117	-0.702858	-0.798702	-0.618935	-0.56982	-0.655174	-0.608444	-0.562191	-0.730038	-0.733852
2.11783	-0.819206	-0.883579	-0.719547	-0.686169	-0.757694	-0.692368	-0.645161	-0.818253	-0.802994
2.1245	-0.918865	-0.957489	-0.808716	-0.787258	-0.845909	-0.762939	-0.71907	-0.896454	-0.864029
2.13117	-1.00279	-1.02043	-0.887871	-0.875473	-0.920773	-0.822067	-0.785351	-0.965595	-0.918865
2.13783	-1.07479	-1.07336	-0.957012	-0.94986	-0.982761	-0.871658	-0.843525	-1.0252	-0.967503
2.1445	-1.13821	-1.11914	-1.01709	-1.0128	-1.03426	-0.911236	-0.89407	-1.07479	-1.01042
2.15117	-1.19352	-1.15824	-1.06859	-1.06621	-1.07574	-0.943184	-0.937462	-1.1158	-1.04666
2.15783	-1.23978	-1.19114	-1.11246	-1.11151	-1.11008	-0.968933	-0.974655	-1.14965	-1.07574
2.1645	-1.27697	-1.21975	-1.14822	-1.14918	-1.1363	-0.990868	-1.00899	-1.17779	-1.09911
2.17117	-1.30653	-1.2455	-1.17874	-1.18113	-1.15538	-1.00851	-1.04094	-1.20211	-1.11961
2.17783	-1.33038	-1.26886	-1.20449	-1.20974	-1.1692	-1.02234	-1.06955	-1.22356	-1.13678
2.1845	-1.34706	-1.28937	-1.22643	-1.23596	-1.1797	-1.03521	-1.09434	-1.24168	-1.15061
2.19117	-1.35851	-1.30892	-1.24741	-1.2598	-1.18828	-1.04713	-1.11532	-1.25599	-1.16205
2.19783	-1.36423	-1.32799	-1.26839	-1.28031	-1.19638	-1.0581	-1.13153	-1.26696	-1.17254
2.2045	-1.36662	-1.34659	-1.29175	-1.29843	-1.20449	-1.06907	-1.14346	-1.27554	-1.18256
2.21117	-1.36375	-1.36423	-1.31512	-1.31512	-1.21307	-1.08099	-1.15061	-1.28126	-1.19066
2.21783	-1.35469	-1.38044	-1.33801	-1.33085	-1.22309	-1.09482	-1.15395	-1.28555	-1.19591
2.2245	-1.33753	-1.39666	-1.36042	-1.34563	-1.2331	-1.1096	-1.15395	-1.28794	-1.19972
2.23117	-1.31369	-1.41335	-1.3814	-1.35756	-1.24264	-1.12534	-1.15204	-1.28937	-1.20211
2.23783	-1.28078	-1.42956	-1.40047	-1.36852	-1.25027	-1.14155	-1.14679	-1.28937	-1.20306
2.2445	-1.23882	-1.44529	-1.41764	-1.37997	-1.25456	-1.15824	-1.13726	-1.28651	-1.20115
2.25117	-1.18828	-1.46008	-1.43194	-1.3895	-1.25647	-1.1735	-1.12247	-1.28031	-1.19495
2.25783	-1.1301	-1.47343	-1.44482	-1.39618	-1.25742	-1.18589	-1.1034	-1.27077	-1.18399
2.2645	-1.06573	-1.48535	-1.45674	-1.39952	-1.2579	-1.19638	-1.08004	-1.2579	-1.16968
2.27117	-0.996113	-1.49632	-1.46675	-1.40095	-1.25694	-1.20449	-1.05143	-1.24359	-1.15299
2.27783	-0.925541	-1.50585	-1.47486	-1.39856	-1.25599	-1.21069	-1.01852	-1.22643	-1.13297
2.2845	-0.85783	-1.51443	-1.48201	-1.39189	-1.25599	-1.21307	-0.982761	-1.20687	-1.11008
2.29117	-0.794887	-1.52016	-1.48869	-1.38235	-1.25742	-1.21212	-0.944614	-1.18399	-1.08576
2.29783	-0.739574	-1.52493	-1.49584	-1.37186	-1.25742	-1.20878	-0.903606	-1.15824	-1.05906
2.3045	-0.695705	-1.52922	-1.50108	-1.35994	-1.25647	-1.20354	-0.859261	-1.13058	-1.02949
2.31117	-0.665188	-1.53255	-1.50394	-1.34563	-1.25408	-1.19638	-0.812054	-1.09959	-0.99659
2.31783	-0.648975	-1.53399	-1.50585	-1.32942	-1.24979	-1.18637	-0.765324	-1.06573	-0.960827
2.3245	-0.646591	-1.53589	-1.50633	-1.31321	-1.24502	-1.17493	-0.719547	-1.02806	-0.923157
2.33117	-0.658989	-1.53923	-1.50585	-1.297	-1.23978	-1.16253	-0.675678	-0.988007	-0.884533
2.33783	-0.684738	-1.54257	-1.50299	-1.2784	-1.23405	-1.14822	-0.633717	-0.946045	-0.84734
2.3445	-0.722885	-1.544	-1.50061	-1.25885	-1.2269	-1.13106	-0.596046	-0.902176	-0.811577
2.35117	-0.771999	-1.54304	-1.4987	-1.23978	-1.2188	-1.11198	-0.564098	-0.855923	-0.776768
2.35783	-0.830174	-1.53923	-1.49775	-1.22166	-1.20974	-1.09243	-0.537872	-0.807762	-0.744343
2.3645	-0.895023	-1.53494	-1.49345	-1.20401	-1.19781	-1.07336	-0.516891	-0.759125	-0.713825
2.37117	-0.961304	-1.53065	-1.4863	-1.18732	-1.18446	-1.05476	-0.501633	-0.710964	-0.684738
2.37783	-1.02949	-1.52636	-1.47629	-1.17302	-1.17016	-1.03569	-0.49305	-0.663281	-0.657082
2.3845	-1.09673	-1.52254	-1.46341	-1.16014	-1.15633	-1.01709	-0.490189	-0.61655	-0.630856
2.39117	-1.16205	-1.51873	-1.44768	-1.1487	-1.14298	-0.998497	-0.492096	-0.572205	-0.606537
2.39783	-1.22452	-1.51682	-1.43099	-1.13869	-1.13058	-0.981331	-0.500202	-0.531197	-0.586033
2.4045	-1.28269	-1.51348	-1.41382	-1.13058	-1.12009	-0.966549	-0.514507	-0.495911	-0.568867
2.41117	-1.33657	-1.50871	-1.39618	-1.12438	-1.11103	-0.954628	-0.535011	-0.46587	-0.555992
2.41783	-1.38426	-1.50204	-1.37854	-1.12009	-1.1034	-0.946045	-0.561237	-0.442028	-0.547409
2.4245	-1.42431	-1.49584	-1.36185	-1.11914	-1.09816	-0.9408	-0.593662	-0.424385	-0.544071
2.43117	-1.45626	-1.48964	-1.34563	-1.12152	-1.09577	-0.938892	-0.630856	-0.412464	-0.545025
2.43783	-1.48058	-1.48201	-1.32895	-1.12581	-1.09577	-0.938892	-0.67234	-0.406742	-0.55027
2.4445	-1.49536	-1.47343	-1.31178	-1.13153	-1.09863	-0.9408	-0.716209	-0.406265	-0.559807
2.45117	-1.49965	-1.46484	-1.29652	-1.13964	-1.10388	-0.944614	-0.762939	-0.412941	-0.573158
2.45783	-1.49298	-1.45674	-1.28269	-1.15061	-1.11055	-0.95129	-0.810623	-0.427246	-0.589371
2.4645	-1.47533	-1.44911	-1.27125	-1.16444	-1.12009	-0.961781	-0.858784	-0.449657	-0.609398
2.47117	-1.44672	-1.44339	-1.26219	-1.18065	-1.13344	-0.976086	-0.907421	-0.479698	-0.63324
2.47783	-1.40953	-1.44005	-1.25694	-1.19925	-1.14965	-0.993252	-0.957012	-0.516891	-0.660896
2.4845	-1.36709	-1.43766	-1.25551	-1.21784	-1.1692	-1.01376	-1.0066	-0.55933	-0.69046
2.49117	-1.32656	-1.43576	-1.2579	-1.23787	-1.19162	-1.03712	-1.05524	-0.605583	-0.721455
2.49783	-1.29652	-1.43433	-1.26314	-1.25885	-1.21546	-1.06144	-1.10388	-0.65279	-0.754833
2.5045	-1.28269	-1.43433	-1.27125	-1.28031	-1.23882	-1.08576	-1.15156	-0.699997	-0.788212
2.51117	-1.28698	-1.4348	-1.28126	-1.30224	-1.25933	-1.11008	-1.19734	-0.748158	-0.82016
2.51783	-1.30987	-1.43623	-1.29223	-1.32418	-1.27697	-1.13487	-1.23882	-0.795841	-0.849247
2.5245	-1.3485	-1.43766	-1.3032	-1.34611	-1.29223	-1.16014	-1.27745	-0.843048	-0.876427
2.53117	-1.39713	-1.43909	-1.31369	-1.36757	-1.3051	-1.18303	-1.31178	-0.887871	-0.90313
2.53783	-1.44863	-1.43862	-1.32608	-1.38807	-1.31655	-1.20449	-1.3423	-0.930786	-0.929832
2.5445	-1.49679	-1.43576	-1.33848	-1.40667	-1.32895	-1.22499	-1.37043	-0.97084	-0.956535
2.55117	-1.53875	-1.43194	-1.35136	-1.42431	-1.34277	-1.24693	-1.39713	-1.00756	-0.983238
2.55783	-1.57309	-1.42717	-1.36328	-1.441	-1.35851	-1.26839	-1.42193	-1.03903	-1.01137
2.5645	-1.59931	-1.42336	-1.3752	-1.45817	-1.37424	-1.28889	-1.44386	-1.06621	-1.04141
2.57117	-1.61839	-1.4205	-1.3876	-1.47486	-1.38998	-1.30939	-1.46246	-1.09005	-1.07098
2.57783	-1.62983	-1.42002	-1.39952	-1.49059	-1.40524	-1.33038	-1.4782	-1.11103	-1.09911
2.5845	-1.63412	-1.42193	-1.41096	-1.50585	-1.42002	-1.35088	-1.4925	-1.13058	-1.12534
2.59117	-1.63221	-1.42622	-1.42288	-1.52016	-1.43433	-1.36995	-1.5049	-1.14918	-1.15013
2.59783	-1.62649	-1.43147	-1.43671	-1.53303	-1.44768	-1.38664	-1.51587	-1.16682	-1.17397
2.6045	-1.61743	-1.43766	-1.45197	-1.54495	-1.46055	-1.40047	-1.52636	-1.18303	-1.19591
2.61117	-1.60599	-1.44577	-1.46866	-1.55449	-1.47295	-1.41239	-1.53589	-1.19638	-1.21784
2.61783	-1.59264	-1.45483	-1.48487	-1.5626	-1.48344	-1.42288	-1.54352	-1.20831	-1.2393
2.6245	-1.57881	-1.46246	-1.50061	-1.56879	-1.49155	-1.43099	-1.54972	-1.2188	-1.2598
2.63117	-1.5645	-1.46866	-1.51396	-1.57213	-1.49679	-1.43719	-1.55449	-1.22738	-1.2784
2.63783	-1.5502	-1.4739	-1.52445	-1.57213	-1.49965	-1.44005	-1.55592	-1.23405	-1.29557
2.6445	-1.53446	-1.47772	-1.53112	-1.56832	-1.49918	-1.43957	-1.55163	-1.24073	-1.31035
2.65117	-1.51491	-1.4782	-1.53303	-1.56116	-1.49488	-1.43433	-1.54161	-1.24693	-1.32036
2.65783	-1.49012	-1.47486	-1.52922	-1.54877	-1.48392	-1.42145	-1.52206	-1.24931	-1.32561
2.6645	-1.45721	-1.4658	-1.51777	-1.52779	-1.46484	-1.39856	-1.48916	-1.24455	-1.32418
2.67117	-1.41239	-1.44768	-1.49632	-1.49679	-1.43242	-1.36089	-1.44148	-1.23167	-1.31512
2.67783	-1.35231	-1.41621	-1.46246	-1.45102	-1.3833	-1.30653	-1.37568	-1.20926	-1.29271
2.6845	-1.27411	-1.36757	-1.41382	-1.3876	-1.31273	-1.23262	-1.29175	-1.17254	-1.25313
2.69117	-1.17779	-1.29938	-1.34706	-1.30367	-1.22213	-1.13726	-1.18876	-1.11914	-1.194
2.69783	-1.06621	-1.21069	-1.26076	-1.19877	-1.11246	-1.02329	-1.0705	-1.04809	-1.11532
2.7045	-0.9408	-1.1034	-1.15681	-1.07527	-0.98753	-0.8955	-0.9408	-0.960827	-1.019
2.71117	-0.806809	-0.981331	-1.0376	-0.937462	-0.854015	-0.760555	-0.806332	-0.858307	-0.906467
2.71783	-0.669479	-0.851631	-0.905991	-0.793457	-0.718594	-0.625134	-0.67234	-0.744343	-0.784397
2.7245	-0.535488	-0.720501	-0.768185	-0.650883	-0.590324	-0.49448	-0.545502	-0.62561	-0.659943
2.73117	-0.410557	-0.594616	-0.631332	-0.515938	-0.474453	-0.375748	-0.430584	-0.507832	-0.54121
2.73783	-0.299454	-0.479221	-0.503063	-0.393391	-0.372887	-0.274658	-0.331879	-0.398159	-0.433445
2.7445	-0.204563	-0.378132	-0.389099	-0.288963	-0.288486	-0.193119	-0.250339	-0.301838	-0.339508
2.75117	-0.127315	-0.294208	-0.294208	-0.204563	-0.220776	-0.129223	-0.185013	-0.221729	-0.261307
2.75783	-0.0686646	-0.227451	-0.220299	-0.14019	-0.169277	-0.082016	-0.134945	-0.15831	-0.199795
2.7645	-0.0271797	-0.177383	-0.165939	-0.0929832	-0.132561	-0.0491142	-0.0987053	-0.111103	-0.154018
2.77117	-0.0009537	-0.141144	-0.128746	-0.0610352	-0.108242	-0.0290871	-0.0758171	-0.0786781	-0.122547
2.77783	0.0114441	-0.117302	-0.105858	-0.0429153	-0.0944138	-0.0171661	-0.064373	-0.0591278	-0.102043
2.7845	0.0100136	-0.102997	-0.0934601	-0.0362396	-0.0886917	-0.0114441	-0.0610352	-0.0505447	-0.0905991
2.79117	-0.002861	-0.0963211	-0.0872612	-0.0371933	-0.0886917	-0.0109673	-0.0638962	-0.0500679	-0.0872612
2.79783	-0.0238419	-0.0953674	-0.0858307	-0.0429153	-0.0920296	-0.0162125	-0.0715256	-0.0567436	-0.0882149
2.8045	-0.0495911	-0.0982285	-0.0891685	-0.0529289	-0.0982285	-0.0257492	-0.0834465	-0.067234	-0.0934601
2.81117	-0.079155	-0.104904	-0.0977516	-0.0653267	-0.106812	-0.0391006	-0.0972748	-0.079155	-0.100613
2.81783	-0.109196	-0.115395	-0.108719	-0.0786781	-0.117779	-0.0543594	-0.111103	-0.0915527	-0.109673
2.8245	-0.141144	-0.129223	-0.121593	-0.0901222	-0.129223	-0.0686646	-0.124454	-0.103951	-0.12064
2.83117	-0.201225	-0.144482	-0.133514	-0.100136	-0.141144	-0.0815392	-0.137806	-0.116348	-0.132561
2.83783	-0.42057	-0.15974	-0.143051	-0.108242	-0.153065	-0.0925064	-0.14925	-0.128269	-0.144482
2.8445	-1.03712	-0.172615	-0.150204	-0.114441	-0.168323	-0.103474	-0.160694	-0.139713	-0.155926
2.85117	-2.13814	-0.183106	-0.15831	-0.132561	-0.228405	-0.133038	-0.19455	-0.156403	-0.187397
2.85783	-3.48568	-0.216961	-0.219822	-0.259399	-0.498772	-0.286102	-0.355244	-0.231266	-0.287056
2.8645	-4.68731	-0.431538	-0.517368	-0.711441	-1.16539	-0.711441	-0.74482	-0.481129	-0.123978
2.87117	-5.51081	-1.05715	-1.16682	-1.513	-2.03371	-1.19162	-0.99659	-0.673294	1.95265
2.87783	-5.8918	-1.98936	-1.8034	-2.18058	-2.39372	-0.85783	0.0214577	0.473499	9.30929
2.8845	-5.72205	-2.62117	-1.57022	-1.85919	-1.31989	1.57118	3.93629	5.43308	26.402
2.89117	-4.99296	-2.16293	0.462055	0.230312	1.95551	7.32374	12.3615	17.3826	57.6491
2.89783	-3.97444	-0.11158	4.91953	4.63724	8.16917	17.5452	26.8712	39.6757	106.62
2.9045	-3.07322	3.78609	12.28	11.9352	18.2128	33.608	49.2682	75.7432	174.923
2.91117	-2.50196	9.71222	22.8624	22.5782	32.804	56.8361	81.1944	128.361	260.312
2.91783	-2.19965	17.4332	36.3588	36.5043	52.2003	87.9278	123.413	197.987	355.808
2.9245	-2.038	26.0782	51.6872	53.1154	76.2463	126.661	175.357	281.53	450.973
2.93117	-1.94168	34.4558	67.3723	71.5818	104.469	171.808	234.951	372.446	534.538
2.93783	-1.87826	41.595	82.0189	90.982	135.806	220.919	298.401	461.915	596.746
2.9445	-1.83392	46.9017	94.3661	110.093	168.248	270.076	360.162	540.286	630.994
2.95117	-1.80149	49.9969	103.267	127.339	198.954	314.279	413.662	598.741	635.059
2.95783	-1.77526	50.7097	107.882	141.055	224.736	348.434	452.654	631.119	611.374
2.9645	-1.75285	49.1481	107.902	149.835	242.709	368.505	472.637	635.268	565.978
2.97117	-1.73426	45.6896	103.613	152.83	250.915	372.444	471.884	613.297	506.612
2.97783	-1.719	40.8988	95.8118	149.926	248.733	360.586	451.721	570.626	440.836
2.9845	-1.70612	35.4037	85.6113	141.737	236.959	335.424	416.004	514.283	374.817
2.99117	-1.69468	29.7813	74.2087	129.445	217.548	300.87	370.01	451.236	312.873
2.99783	-1.68514	24.4765	62.6836	114.541	193.121	261.305	319.216	387.285	257.567
3.0045	-1.67799	19.7716	51.8622	98.5413	166.42	220.746	268.359	326.609	210.042
3.01117	-1.6737	15.7971	42.2707	82.7689	139.845	182.306	220.926	271.803	170.423
3.01783	-1.67036	12.5647	34.1487	68.2054	115.19	148.004	179.053	224.141	138.185
3.0245	-1.66702	10.0069	27.5135	55.4476	93.544	118.822	143.682	183.923	112.438
3.03117	-1.66416	8.01802	22.2368	44.7383	75.3646	94.9259	114.844	150.787	92.1454
3.03783	-1.66607	6.4826	18.1155	36.0494	60.6189	75.9249	91.9771	123.987	76.2687
3.0445	-1.68228	5.29528	14.9231	29.1772	48.9602	61.1219	74.1987	102.587	63.8604
3.05117	-1.72806	4.36878	12.4483	23.8271	39.8884	49.7184	60.5268	85.6204	54.1139
3.05783	-1.81723	3.63445	10.5109	19.6857	32.8674	40.9493	50.0288	72.1798	46.3729
3.0645	-1.94073	3.03793	8.96835	16.4652	27.4005	34.1511	41.8973	61.4705	40.1239
3.07117	-2.05803	2.53963	7.7095	13.9217	23.0656	28.7886	35.4776	52.8307	34.9727
3.07783	-2.11573	2.10905	6.64663	11.8585	19.5341	24.4508	30.2677	45.7215	30.6215
3.0845	-2.07424	1.7252	5.71775	10.1266	16.5815	20.8502	25.9156	39.7234	26.8545
3.09117	-1.91736	1.37854	4.89092	8.636	14.0843	17.8103	22.2082	34.5407	23.5343
3.09783	-1.65319	1.07145	4.16327	7.34901	11.9891	15.2435	19.0425	30.0007	20.596
3.1045	-1.31798	0.815868	3.54719	6.26087	10.2777	13.1111	16.3789	26.0334	18.0264
3.11117	-0.97084	0.626564	3.05891	5.3792	8.93402	11.3902	14.1993	22.6288	15.8329
3.11783	-0.677586	0.511169	2.70748	4.70734	7.93362	10.0565	12.4846	19.7926	14.0247
3.1245	-0.480175	0.469208	2.48909	4.23622	7.2279	9.06658	11.1938	17.5228	12.5933
3.13117	-0.383854	0.487804	2.38132	3.93629	6.74105	8.35133	10.2534	15.7838	11.5013
3.13783	-0.370503	0.544071	2.34604	3.75605	6.38628	7.82251	9.56297	14.4968	10.6826
3.1445	-0.414848	0.607967	2.34079	3.64017	6.08873	7.39527	9.02271	13.546	10.0522
3.15117	-0.495911	0.649929	2.32792	3.54147	5.80549	7.01284	8.56209	12.8136	9.53627
3.15783	-0.597954	0.653744	2.28691	3.43227	5.51987	6.64663	8.14152	12.208	9.08232
3.1645	-0.708103	0.616074	2.20919	3.30305	5.22852	6.28805	7.74384	11.6735	8.66127
3.17117	-0.819206	0.540257	2.09761	3.15189	4.9324	5.93519	7.36332	11.1804	8.26025
3.17783	-0.924587	0.434875	1.95789	2.98071	4.63295	5.58853	6.99854	10.7117	7.8721
3.1845	-1.02377	0.310421	1.79625	2.78997	4.33207	5.2495	6.64568	10.2577	7.4954
3.19117	-1.11675	0.178814	1.61934	2.58255	4.03214	4.9181	6.3014	9.80997	7.12681
3.19783	-1.20211	0.0481606	1.4348	2.36368	3.73602	4.59528	5.9638	9.36413	6.76394
3.2045	-1.27983	-0.0758171	1.25313	2.13957	3.44563	4.28247	5.63288	8.91733	6.40535
3.21117	-1.34945	-0.190258	1.07908	1.91927	3.16429	3.98064	5.31054	8.47101	6.05154
3.21783	-1.41287	-0.294208	0.915527	1.70755	2.89488	3.69024	4.9963	8.02755	5.7044
3.2245	-1.46914	-0.388145	0.763893	1.50871	2.64025	3.41368	4.69208	7.59029	5.36537
3.23117	-1.51682	-0.471115	0.625134	1.32418	2.40183	3.15189	4.39835	7.16162	5.03635
3.23783	-1.55401	-0.544548	0.500679	1.15395	2.1801	2.90585	4.11892	6.74582	4.72021
3.2445	-1.58167	-0.608921	0.388622	0.998497	1.97601	2.67553	3.8538	6.3448	4.41933
3.25117	-1.60122	-0.665665	0.287533	0.856876	1.78862	2.46143	3.6025	5.95999	4.13609
3.25783	-1.61171	-0.716209	0.197411	0.728607	1.61695	2.26498	3.36504	5.5933	3.86953
3.2645	-1.61505	-0.761032	0.117302	0.611305	1.45817	2.08473	3.14331	5.24521	3.61919
3.27117	-1.61314	-0.801563	0.0448227	0.50354	1.31178	1.91927	2.93732	4.91667	3.38364
3.27783	-1.60933	-0.83828	-0.0228882	0.405312	1.17588	1.76716	2.74611	4.60815	3.16334
3.2845	-1.60456	-0.872612	-0.0863075	0.315189	1.04904	1.62649	2.5692	4.31919	2.95639
3.29117	-1.60122	-0.90456	-0.146389	0.230789	0.93174	1.49632	2.40469	4.0493	2.76041
3.29783	-1.60122	-0.935554	-0.203609	0.151157	0.822067	1.37377	2.25115	3.79562	2.57492
3.3045	-1.60599	-0.965118	-0.257969	0.0767708	0.720501	1.25885	2.10524	3.55625	2.40088
3.31117	-1.61314	-0.992775	-0.308514	0.00762939	0.626564	1.15108	1.96695	3.33023	2.23875
3.31783	-1.62172	-1.01757	-0.356197	-0.0562668	0.540257	1.04904	1.83582	3.11756	2.08616
3.3245	-1.62983	-1.03998	-0.399589	-0.114441	0.461578	0.954151	1.71328	2.91634	1.94263
3.33117	-1.63507	-1.06001	-0.440121	-0.168323	0.389099	0.865936	1.60027	2.72751	1.80912
3.33783	-1.63507	-1.07765	-0.475884	-0.217915	0.322342	0.786781	1.49727	2.5506	1.68419
3.3445	-1.62697	-1.09243	-0.507355	-0.261307	0.259399	0.714302	1.40381	2.38562	1.56784
3.35117	-1.6098	-1.10435	-0.535488	-0.298023	0.201702	0.649929	1.32036	2.23255	1.45817
3.35783	-1.58501	-1.1158	-0.561714	-0.329971	0.149727	0.595093	1.24645	2.0895	1.3566
3.3645	-1.55401	-1.12677	-0.587463	-0.356674	0.101566	0.548363	1.18113	1.95742	1.26314
3.37117	-1.5192	-1.13821	-0.614166	-0.378609	0.0572205	0.509739	1.12438	1.83439	1.17588
3.37783	-1.48344	-1.15013	-0.641823	-0.396252	0.017643	0.476837	1.07622	1.72138	1.09577
3.3845	-1.45245	-1.16253	-0.669479	-0.412464	-0.0171661	0.449657	1.03664	1.61648	1.02139
3.39117	-1.43147	-1.1754	-0.696659	-0.42963	-0.0491142	0.427723	1.00327	1.5192	0.954151
3.39783	-1.42241	-1.18876	-0.723362	-0.44775	-0.0786781	0.407696	0.974655	1.4286	0.891209
3.4045	-1.42574	-1.20306	-0.747681	-0.468731	-0.106335	0.388145	0.948906	1.3423	0.830173
3.41117	-1.44005	-1.2188	-0.769615	-0.494003	-0.132084	0.369072	0.925064	1.2598	0.768185
3.41783	-1.46341	-1.23549	-0.790119	-0.52309	-0.15831	0.349045	0.900745	1.17874	0.705242
3.4245	-1.4925	-1.25217	-0.810623	-0.555515	-0.18549	0.32568	0.874043	1.09959	0.6423
3.43117	-1.52254	-1.27029	-0.831127	-0.590801	-0.2141	0.298023	0.843048	1.02139	0.578403
3.43783	-1.55067	-1.28794	-0.851154	-0.629902	-0.244617	0.266552	0.806332	0.944138	0.514507
3.4445	-1.57547	-1.3032	-0.871658	-0.67091	-0.277519	0.231743	0.761032	0.867844	0.449657
3.45117	-1.59502	-1.31416	-0.891686	-0.711918	-0.312805	0.190258	0.707626	0.79298	0.384808
3.45783	-1.60885	-1.32322	-0.912189	-0.751972	-0.349522	0.142574	0.644207	0.718594	0.320435
3.4645	-1.61648	-1.33085	-0.931263	-0.790119	-0.387669	0.0901222	0.573158	0.644684	0.255585
3.47117	-1.61743	-1.33753	-0.948906	-0.825405	-0.427723	0.0343323	0.495911	0.571728	0.190735
3.47783	-1.61266	-1.34182	-0.963211	-0.857353	-0.467777	-0.0243187	0.413895	0.498772	0.126362
3.4845	-1.60265	-1.34611	-0.974655	-0.88644	-0.506878	-0.084877	0.328064	0.426292	0.0658035
3.49117	-1.58739	-1.34945	-0.984192	-0.912666	-0.545025	-0.146389	0.240803	0.354767	0.00953674
3.49783	-1.56689	-1.35136	-0.992775	-0.937939	-0.583172	-0.206471	0.153065	0.286579	-0.0419617
3.5045	-1.53971	-1.3485	-1.00088	-0.961304	-0.620365	-0.265122	0.067234	0.221729	-0.0896454
3.51117	-1.50347	-1.34325	-1.00708	-0.982761	-0.657082	-0.322819	-0.0157356	0.160217	-0.134945
3.51783	-1.45483	-1.3361	-1.01185	-1.00231	-0.690937	-0.377178	-0.0948906	0.10252	-0.175476
3.5245	-1.39141	-1.32656	-1.01423	-1.01948	-0.722408	-0.426769	-0.166416	0.0486374	-0.211716
3.53117	-1.31178	-1.31321	-1.01471	-1.03188	-0.749111	-0.470161	-0.230312	-0.0004768	-0.242233
3.53783	-1.21593	-1.29509	-1.0128	-1.04046	-0.771046	-0.508785	-0.287056	-0.0433922	-0.267506
3.5445	-1.10388	-1.27316	-1.0066	-1.04427	-0.788212	-0.540733	-0.337601	-0.0796318	-0.285149
3.55117	-0.976562	-1.24741	-0.997066	-1.0438	-0.80061	-0.566482	-0.380039	-0.110149	-0.296116
3.55783	-0.83828	-1.21737	-0.985622	-1.03903	-0.808239	-0.587463	-0.414372	-0.133038	-0.299931
3.5645	-0.697136	-1.18446	-0.97084	-1.02949	-0.810146	-0.60463	-0.441074	-0.147819	-0.297546
3.57117	-0.559807	-1.15156	-0.951767	-1.01709	-0.80967	-0.61655	-0.45824	-0.154495	-0.28944
3.57783	-0.434399	-1.122	-0.929356	-1.0004	-0.806332	-0.623226	-0.467777	-0.154018	-0.275135
3.5845	-0.330448	-1.09625	-0.908375	-0.979424	-0.800133	-0.626087	-0.471115	-0.147819	-0.257492
3.59117	-0.256538	-1.07527	-0.889778	-0.955105	-0.79155	-0.626087	-0.470161	-0.136852	-0.239372
3.59783	-0.219822	-1.06144	-0.874043	-0.928879	-0.782967	-0.623703	-0.4673	-0.12207	-0.222206
3.6045	-0.219822	-1.05715	-0.861645	-0.901699	-0.776291	-0.619412	-0.464916	-0.107288	-0.207901
3.61117	-0.255108	-1.06049	-0.855923	-0.87595	-0.772476	-0.61655	-0.463963	-0.0944138	-0.198841
3.61783	-0.319958	-1.0705	-0.857353	-0.854015	-0.771046	-0.615597	-0.466347	-0.0872612	-0.195503
3.6245	-0.406742	-1.08671	-0.864506	-0.836849	-0.773907	-0.617504	-0.470638	-0.0882149	-0.197887
3.63117	-0.504971	-1.10865	-0.876427	-0.825405	-0.781059	-0.621796	-0.476837	-0.0977516	-0.20504
3.63783	-0.60463	-1.13392	-0.893593	-0.818253	-0.792503	-0.630379	-0.486851	-0.116825	-0.216961
3.6445	-0.695229	-1.1611	-0.916004	-0.817299	-0.807762	-0.643253	-0.500679	-0.145912	-0.234604
3.65117	-0.767708	-1.18876	-0.941277	-0.822544	-0.825882	-0.658512	-0.517845	-0.183106	-0.256538
3.65783	-0.813961	-1.21546	-0.966549	-0.831127	-0.845432	-0.672817	-0.536442	-0.22459	-0.282288
3.6645	-0.826359	-1.23882	-0.990868	-0.841618	-0.865936	-0.686169	-0.555038	-0.267983	-0.308991
3.67117	-0.798702	-1.25647	-1.01137	-0.854969	-0.885487	-0.697136	-0.573635	-0.310898	-0.33474
3.67783	-0.724316	-1.26457	-1.02711	-0.869274	-0.901699	-0.703335	-0.58794	-0.349045	-0.35572
3.6845	-0.596523	-1.26123	-1.03474	-0.882626	-0.911236	-0.702381	-0.595093	-0.378609	-0.370026
3.69117	-0.410557	-1.24264	-1.03378	-0.891686	-0.912189	-0.692368	-0.591755	-0.396728	-0.376225
3.69783	-0.160694	-1.2064	-1.02091	-0.895023	-0.901222	-0.67234	-0.576973	-0.402451	-0.368595
3.7045	0.154495	-1.14822	-0.991821	-0.889301	-0.874519	-0.639915	-0.549793	-0.39196	-0.342369
3.71117	0.534058	-1.06287	-0.941753	-0.869274	-0.828266	-0.589848	-0.504017	-0.358581	-0.291824
3.71783	0.975609	-0.945091	-0.864983	-0.83065	-0.758648	-0.516891	-0.433922	-0.298023	-0.212193
3.7245	1.47438	-0.785351	-0.755787	-0.768661	-0.658989	-0.413418	-0.333309	-0.205517	-0.0958443
3.73117	2.02274	-0.572681	-0.60606	-0.673294	-0.52166	-0.271797	-0.195503	-0.0743866	0.0667572
3.73783	2.6083	-0.291824	-0.405312	-0.535011	-0.335216	-0.0810623	-0.0100136	0.105381	0.284672
3.7445	3.22199	0.0767708	-0.14019	-0.342369	-0.0844002	0.17643	0.236988	0.34523	0.569344
3.75117	3.85332	0.556946	0.208378	-0.0801086	0.25177	0.52166	0.561237	0.658989	0.937462
3.75783	4.49133	1.17779	0.667095	0.272751	0.702381	0.984192	0.981331	1.06287	1.41239
3.7645	5.12171	1.96791	1.26934	0.744343	1.30558	1.59979	1.52302	1.58215	2.02179
3.77117	5.72729	2.95305	2.05278	1.36852	2.11	2.41613	2.22063	2.24972	2.79903
3.77783	6.2871	4.14944	3.05748	2.18534	3.17097	3.48425	3.11327	3.10183	3.78227
3.7845	6.77824	5.55372	4.31728	3.2382	4.5414	4.85468	4.23908	4.18139	5.00917
3.79117	7.17354	7.13587	5.8527	4.56572	6.26516	6.56557	5.62763	5.53083	6.50597
3.79783	7.44629	8.8315	7.658	6.19078	8.358	8.62741	7.29322	7.18689	8.28075
3.8045	7.57217	10.5443	9.69028	8.10719	10.7918	11.0097	9.22441	9.16529	10.3149
3.81117	7.5388	12.1489	11.8632	10.2668	13.4788	13.6261	11.3692	11.4479	12.548
3.81783	7.34472	13.5088	14.0457	12.5737	16.2683	16.336	13.6313	13.9713	14.873
3.8245	6.99854	14.4935	16.0699	14.8821	18.9571	18.9452	15.872	16.6202	17.139
3.83117	6.51598	15.0023	17.756	17.0121	21.3079	21.2336	17.9238	19.2242	19.1674
3.83783	5.92041	14.9803	18.9376	18.7702	23.087	22.9845	19.6085	21.5774	20.7758
3.8445	5.23806	14.43	19.4907	19.9814	24.1089	24.0211	20.7653	23.4647	21.8019
3.85117	4.49467	13.4087	19.3534	20.5178	24.2658	24.24	21.276	24.6954	22.1348
3.85783	3.71599	12.0168	18.5394	20.3238	23.5496	23.6249	21.0896	25.136	21.7357
3.8645	2.92587	10.3827	17.1371	19.4259	22.0499	22.2521	20.2265	24.7364	20.6461
3.87117	2.14911	8.64077	15.2912	17.9262	19.938	20.2718	18.7793	23.5395	18.9772
3.87783	1.40905	6.91223	13.1755	15.9807	17.4303	17.8795	16.8881	21.6684	16.8872
3.8845	0.725746	5.29337	10.9649	13.7725	14.7481	15.2826	14.7219	19.3067	14.5574
3.89117	0.115395	3.84808	8.80957	11.4822	12.0897	12.6724	12.4493	16.664	12.1641
3.89783	-0.412464	2.6083	6.82497	9.26113	9.60732	10.2005	10.2172	13.9451	9.85622
3.9045	-0.854969	1.58072	5.08308	7.22027	7.39956	7.9689	8.13675	11.3206	7.73954
3.91117	-1.21498	0.752926	3.61252	5.42641	5.51271	6.03342	6.27851	8.91495	5.8794
3.91783	-1.50156	0.101566	2.41137	3.90863	3.95155	4.40884	4.6773	6.80447	4.3025
3.9245	-1.72424	-0.402927	1.45292	2.66218	2.69222	3.0818	3.33738	5.01966	3.00598
3.93117	-1.89495	-0.788689	0.704765	1.66273	1.69659	2.01941	2.24257	3.5553	1.96648
3.93783	-2.02513	-1.08051	0.1297	0.87595	0.919819	1.18256	1.36328	2.38276	1.14965
3.9445	-2.12288	-1.30033	-0.308037	0.265598	0.318527	0.531197	0.666142	1.46389	0.517845
3.95117	-2.19631	-1.46675	-0.640392	-0.203609	-0.146389	0.0281334	0.121117	0.754833	0.0348091
3.95783	-2.25163	-1.59311	-0.89407	-0.564098	-0.505447	-0.359535	-0.300407	0.2141	-0.331402
3.9645	-2.29311	-1.69182	-1.08671	-0.842094	-0.783443	-0.658512	-0.62418	-0.193596	-0.607491
3.97117	-2.32363	-1.76859	-1.23405	-1.05715	-0.999451	-0.889778	-0.873089	-0.498772	-0.814438
3.97783	-2.34365	-1.82819	-1.34802	-1.22595	-1.16968	-1.06907	-1.06287	-0.724316	-0.967503
3.9845	-2.35748	-1.8754	-1.43814	-1.36042	-1.3051	-1.21117	-1.2064	-0.891686	-1.08147
3.99117	-2.36559	-1.91545	-1.5111	-1.46961	-1.4143	-1.32465	-1.31512	-1.01614	-1.16873
3.99783	-2.36893	-1.94979	-1.57118	-1.55926	-1.50537	-1.41764	-1.39952	-1.11151	-1.23787
4.0045	-2.36893	-1.97887	-1.62363	-1.63507	-1.5831	-1.49584	-1.4677	-1.18732	-1.29604
4.01117	-2.36702	-2.00415	-1.67322	-1.70088	-1.65224	-1.5626	-1.5254	-1.25217	-1.34802
4.01783	-2.36559	-2.02751	-1.72186	-1.75905	-1.71518	-1.62315	-1.57595	-1.31035	-1.39856
4.0245	-2.36464	-2.0504	-1.7705	-1.81055	-1.77288	-1.67894	-1.62172	-1.36518	-1.45054
4.03117	-2.3632	-2.07281	-1.81675	-1.8568	-1.82629	-1.73187	-1.66512	-1.41811	-1.50394
4.03783	-2.36225	-2.09379	-1.86157	-1.89972	-1.87588	-1.78146	-1.70612	-1.46961	-1.55687
4.0445	-2.36273	-2.11477	-1.90353	-1.94025	-1.92165	-1.82772	-1.74379	-1.51968	-1.60789
4.05117	-2.36464	-2.13718	-1.94073	-1.97887	-1.96266	-1.87063	-1.77717	-1.56784	-1.65796
4.05783	-2.3675	-2.16103	-1.97315	-2.01511	-1.9989	-1.90926	-1.80578	-1.61409	-1.7066
4.0645	-2.37131	-2.18391	-2.00176	-2.04802	-2.03037	-1.94263	-1.83105	-1.65892	-1.75238
4.07117	-2.37703	-2.20585	-2.03037	-2.07853	-2.05803	-1.97077	-1.85442	-1.70135	-1.79577
4.07783	-2.38466	-2.22588	-2.05708	-2.10524	-2.08378	-1.99318	-1.8754	-1.74046	-1.83678
4.0845	-2.39277	-2.24495	-2.08044	-2.12955	-2.10667	-2.01082	-1.89304	-1.77622	-1.87492
4.09117	-2.40135	-2.26307	-2.1019	-2.15149	-2.12479	-2.0256	-1.90926	-1.8096	-1.90973
4.09783	-2.40946	-2.28119	-2.12336	-2.17104	-2.13957	-2.03753	-1.92404	-1.84011	-1.94216
4.1045	-2.41804	-2.29883	-2.14481	-2.18916	-2.15101	-2.04659	-1.93739	-1.86777	-1.97124
4.11117	-2.4271	-2.31552	-2.16579	-2.2049	-2.1596	-2.05278	-1.94979	-1.89304	-1.99652
4.11783	-2.43664	-2.33173	-2.18391	-2.21825	-2.16579	-2.05755	-1.96266	-1.91784	-2.01941
4.1245	-2.44665	-2.34795	-2.20156	-2.22921	-2.16818	-2.06041	-1.97697	-1.94216	-2.04134
4.13117	-2.4581	-2.36225	-2.21872	-2.23732	-2.16913	-2.06232	-1.9908	-1.96648	-2.0628
4.13783	-2.47049	-2.37513	-2.23494	-2.24304	-2.17009	-2.0628	-2.00415	-1.9908	-2.08378
4.1445	-2.48384	-2.38752	-2.24829	-2.24733	-2.17104	-2.06327	-2.01797	-2.01416	-2.10237
4.15117	-2.4972	-2.39944	-2.25925	-2.25067	-2.17104	-2.06327	-2.0318	-2.03562	-2.11811
4.15783	-2.51007	-2.41184	-2.2707	-2.25258	-2.16866	-2.06137	-2.0442	-2.05469	-2.13099
4.1645	-2.52247	-2.42186	-2.28119	-2.2521	-2.16341	-2.05708	-2.05421	-2.06947	-2.13909
4.17117	-2.53439	-2.42615	-2.28786	-2.24781	-2.15197	-2.04849	-2.06041	-2.07806	-2.14005
4.17783	-2.54679	-2.42043	-2.2831	-2.23732	-2.12955	-2.03228	-2.05994	-2.0771	-2.12812
4.1845	-2.55966	-2.39229	-2.26116	-2.21395	-2.08616	-1.99938	-2.04515	-2.06041	-2.09379
4.19117	-2.57206	-2.32315	-2.20537	-2.1677	-1.99938	-1.92928	-2.00081	-2.00987	-2.01225
4.19783	-2.58398	-2.17772	-2.08282	-2.07424	-1.82533	-1.78099	-1.89495	-1.88684	-1.83153
4.2045	-2.59495	-1.90687	-1.8363	-1.88875	-1.48916	-1.4801	-1.66798	-1.61266	-1.44911
4.21117	-2.60448	-1.4596	-1.38664	-1.54352	-0.889778	-0.918388	-1.21403	-1.05906	-0.703335
4.21783	-2.61211	-0.802517	-0.651836	-0.952721	0.0796318	0.0338554	-0.385284	-0.0433922	0.619411
4.2245	-2.61784	0.0510216	0.421047	-0.043869	1.48392	1.48201	0.982761	1.62935	2.72131
4.23117	-2.62165	1.02472	1.80483	1.20354	3.28875	3.44515	3.00074	4.08173	5.68867
4.23783	-2.62403	1.98269	3.36933	2.71654	5.33104	5.79929	5.63908	7.26128	9.38511
4.2445	-2.62451	2.76375	4.89378	4.32014	7.33089	8.26359	8.67701	10.8747	13.4091
4.25117	-2.62403	3.22437	6.12307	5.7683	8.955	10.4561	11.7087	14.4181	17.1552
4.25783	-2.6226	3.28398	6.83308	6.80637	9.90772	11.9905	14.235	17.293	19.9671
4.2645	-2.61927	2.94256	6.89745	7.24316	10.0174	12.5866	15.7952	18.9695	21.3237
4.27117	-2.61497	2.28405	6.32524	7.00903	9.28783	12.1489	16.1057	19.146	20.9961
4.27783	-2.61021	1.44577	5.25522	6.17409	7.89213	10.7985	15.141	17.8337	19.1092
4.2845	-2.60305	0.576019	3.90959	4.92287	6.11353	8.82673	13.1388	15.3513	16.0942
4.29117	-2.59447	-0.210762	2.51865	3.49379	4.25482	6.5999	10.5143	12.2128	12.5475
4.29783	-2.58398	-0.850677	1.26553	2.10619	2.56014	4.45318	7.72905	8.96358	9.04465
4.3045	-2.57206	-1.33085	0.247002	0.910282	1.16777	2.61211	5.16558	6.0339	5.9948
4.31117	-2.55871	-1.66941	-0.515461	-0.0295639	0.113487	1.17254	3.04937	3.65734	3.58582
4.31783	-2.54393	-1.89924	-1.05381	-0.71764	-0.638008	0.123501	1.44482	1.88208	1.82056
4.3245	-2.52914	-2.05278	-1.42097	-1.19734	-1.15347	-0.604153	0.302792	0.632763	0.594139
4.33117	-2.51484	-2.15578	-1.66655	-1.52397	-1.50013	-1.09291	-0.47493	-0.212193	-0.231266
4.33783	-2.49958	-2.22635	-1.83296	-1.74379	-1.73187	-1.41668	-0.991821	-0.771999	-0.779629
4.3445	-2.48289	-2.27451	-1.94883	-1.89114	-1.88684	-1.63269	-1.33276	-1.1425	-1.14584
4.35117	-2.4662	-2.30598	-2.03323	-1.98889	-1.99127	-1.77813	-1.55878	-1.39046	-1.39379
4.35783	-2.45142	-2.32601	-2.09379	-2.05374	-2.06137	-1.87588	-1.70898	-1.55878	-1.56498
4.3645	-2.43807	-2.33793	-2.13385	-2.09761	-2.1081	-1.94216	-1.80864	-1.67465	-1.68657
4.37117	-2.42472	-2.34222	-2.16007	-2.12574	-2.13671	-1.98698	-1.87445	-1.75667	-1.77479
4.37783	-2.41327	-2.33984	-2.17724	-2.14243	-2.15197	-2.01511	-1.91689	-1.81627	-1.84059
4.3845	-2.40469	-2.33269	-2.18582	-2.15149	-2.15626	-2.02894	-1.94311	-1.86062	-1.89114
4.39117	-2.39944	-2.32267	-2.1863	-2.15387	-2.15197	-2.03228	-1.95789	-1.894	-1.93071
4.39783	-2.39563	-2.31028	-2.18105	-2.15101	-2.14243	-2.02942	-1.966	-1.91879	-1.96171
4.4045	-2.39277	-2.29597	-2.17152	-2.14195	-2.12812	-2.02227	-1.97172	-1.93739	-1.9865
4.41117	-2.39182	-2.28071	-2.15769	-2.12717	-2.10953	-2.01225	-1.97649	-1.95026	-2.00701
4.41783	-2.39182	-2.26688	-2.141	-2.10857	-2.08855	-2.00224	-1.98221	-1.95932	-2.02513
4.4245	-2.39325	-2.25687	-2.12431	-2.08759	-2.069	-1.99366	-1.98936	-1.96695	-2.04229
4.43117	-2.39658	-2.25115	-2.10857	-2.06709	-2.05231	-1.98746	-1.99795	-1.97458	-2.05851
4.43783	-2.40135	-2.24972	-2.09713	-2.04945	-2.03943	-1.98412	-2.00558	-1.98317	-2.07376
4.4445	-2.4085	-2.25306	-2.09188	-2.03609	-2.03228	-1.9846	-2.01368	-1.99461	-2.08759
4.45117	-2.41566	-2.26164	-2.09475	-2.02942	-2.03276	-1.98841	-2.02179	-2.00939	-2.09951
4.45783	-2.41995	-2.27451	-2.10524	-2.03037	-2.04134	-1.99509	-2.03037	-2.02656	-2.11096
4.4645	-2.41709	-2.28977	-2.12002	-2.03896	-2.05612	-2.00558	-2.03991	-2.04563	-2.12145
4.47117	-2.40231	-2.30455	-2.13909	-2.05326	-2.07472	-2.01893	-2.05183	-2.06423	-2.13003
4.47783	-2.36988	-2.31791	-2.1596	-2.0709	-2.09427	-2.03276	-2.06614	-2.07949	-2.13432
4.4845	-2.31504	-2.32792	-2.18058	-2.0895	-2.11239	-2.04468	-2.07853	-2.08902	-2.13194
4.49117	-2.23827	-2.33364	-2.19727	-2.10524	-2.12574	-2.05278	-2.0833	-2.08712	-2.11859
4.49783	-2.14577	-2.33316	-2.20633	-2.11573	-2.13146	-2.05421	-2.07615	-2.06709	-2.08712
4.5045	-2.05088	-2.32649	-2.20871	-2.11859	-2.12908	-2.04706	-2.05278	-2.02322	-2.03371
4.51117	-1.96981	-2.31791	-2.20299	-2.11287	-2.11859	-2.03276	-2.01225	-1.95408	-1.95837
4.51783	-1.91641	-2.3098	-2.19059	-2.10285	-2.10428	-2.01416	-1.95694	-1.86491	-1.86682
4.5245	-1.90067	-2.30312	-2.1739	-2.09045	-2.09188	-1.99652	-1.8959	-1.7662	-1.7724
4.53117	-1.92308	-2.29931	-2.15912	-2.08235	-2.08616	-1.9846	-1.84107	-1.67465	-1.69086
4.53783	-1.97744	-2.30169	-2.15054	-2.07996	-2.08998	-1.98412	-1.80387	-1.61028	-1.63889
4.5445	-2.04992	-2.3098	-2.14958	-2.08759	-2.10524	-1.99747	-1.79291	-1.58596	-1.62554
4.55117	-2.12717	-2.32172	-2.15864	-2.10333	-2.13146	-2.02179	-1.81103	-1.60694	-1.65224
4.55783	-2.19679	-2.33316	-2.17485	-2.12431	-2.16436	-2.05421	-1.85442	-1.66512	-1.71185
4.5645	-2.25067	-2.34222	-2.19488	-2.14672	-2.19917	-2.08902	-1.91355	-1.74761	-1.79052
4.57117	-2.28691	-2.34699	-2.21348	-2.16675	-2.22969	-2.12002	-1.97697	-1.83821	-1.87206
4.57783	-2.30598	-2.34413	-2.22683	-2.18201	-2.25163	-2.14148	-2.03323	-1.9207	-1.94216
4.5845	-2.31028	-2.33412	-2.23303	-2.19107	-2.26307	-2.15149	-2.07424	-1.9846	-1.9927
4.59117	-2.30217	-2.31743	-2.23255	-2.19345	-2.26259	-2.15149	-2.09761	-2.0256	-2.02274
4.59783	-2.28643	-2.2974	-2.22588	-2.18916	-2.25306	-2.14243	-2.10476	-2.04515	-2.03609
4.6045	-2.26879	-2.27642	-2.21491	-2.1801	-2.2378	-2.12622	-2.09951	-2.04992	-2.03657
4.61117	-2.25258	-2.25925	-2.20299	-2.16961	-2.22111	-2.1081	-2.08664	-2.04515	-2.03085
4.61783	-2.24257	-2.25019	-2.1925	-2.1596	-2.20823	-2.09284	-2.07186	-2.03848	-2.02608
4.6245	-2.24257	-2.25067	-2.18773	-2.15387	-2.20156	-2.0833	-2.06184	-2.03419	-2.02703
4.63117	-2.25353	-2.26212	-2.19154	-2.15435	-2.20394	-2.08092	-2.06089	-2.03705	-2.03657
4.63783	-2.27451	-2.28453	-2.20585	-2.16389	-2.21491	-2.08807	-2.06852	-2.05088	-2.05612
4.6445	-2.30455	-2.316	-2.22921	-2.18296	-2.23398	-2.10428	-2.08616	-2.0752	-2.08521
4.65117	-2.33984	-2.35367	-2.26021	-2.21014	-2.2583	-2.12812	-2.11287	-2.10857	-2.12193
4.65783	-2.37751	-2.39325	-2.29645	-2.24113	-2.28596	-2.15673	-2.14624	-2.14815	-2.16198
4.6645	-2.41423	-2.43187	-2.33412	-2.27308	-2.31409	-2.18821	-2.18248	-2.19059	-2.20299
4.67117	-2.44713	-2.46716	-2.36893	-2.30408	-2.34032	-2.2192	-2.21729	-2.23303	-2.24304
4.67783	-2.47383	-2.49672	-2.39754	-2.33126	-2.36368	-2.24686	-2.24876	-2.27165	-2.27976
4.6845	-2.491	-2.51865	-2.4209	-2.35271	-2.38276	-2.26879	-2.27594	-2.30551	-2.31075
4.69117	-2.49577	-2.53296	-2.43855	-2.36797	-2.39563	-2.28405	-2.29836	-2.33269	-2.33507
4.69783	-2.48766	-2.54011	-2.44761	-2.37608	-2.40231	-2.2912	-2.31504	-2.35224	-2.35176
4.7045	-2.46668	-2.54011	-2.44808	-2.37799	-2.40278	-2.28691	-2.32553	-2.36177	-2.35891
4.71117	-2.43473	-2.53201	-2.44045	-2.37274	-2.39515	-2.26879	-2.32744	-2.35939	-2.35415
4.71783	-2.39563	-2.51865	-2.42615	-2.35844	-2.37703	-2.23351	-2.31838	-2.34318	-2.33698
4.7245	-2.35701	-2.50196	-2.40469	-2.33364	-2.34842	-2.17724	-2.29645	-2.31028	-2.30646
4.73117	-2.32744	-2.48337	-2.37751	-2.30122	-2.31314	-2.10381	-2.26212	-2.26116	-2.26259
4.73783	-2.31171	-2.46716	-2.34842	-2.26402	-2.27642	-2.02084	-2.2192	-2.2006	-2.20776
4.7445	-2.31266	-2.45619	-2.32363	-2.22826	-2.244	-1.9412	-2.17295	-2.13623	-2.15006
4.75117	-2.32983	-2.4538	-2.30789	-2.2006	-2.22301	-1.87969	-2.13289	-2.07901	-2.10047
4.75783	-2.36034	-2.45905	-2.30074	-2.18534	-2.21872	-1.84774	-2.10762	-2.03991	-2.06614
4.7645	-2.39611	-2.46954	-2.30408	-2.18678	-2.23255	-1.85347	-2.1019	-2.02703	-2.05326
4.77117	-2.43092	-2.48289	-2.31695	-2.20299	-2.26069	-1.89257	-2.11668	-2.04039	-2.06375
4.77783	-2.46	-2.49434	-2.33698	-2.22826	-2.29692	-1.95694	-2.14672	-2.07567	-2.0957
4.7845	-2.48337	-2.49958	-2.35653	-2.25687	-2.33269	-2.03276	-2.18582	-2.12336	-2.14052
4.79117	-2.50006	-2.49481	-2.37179	-2.28262	-2.3632	-2.10762	-2.2254	-2.17295	-2.18773
4.79783	-2.51198	-2.48098	-2.37894	-2.30217	-2.38609	-2.17199	-2.26069	-2.21682	-2.22921
4.8045	-2.51961	-2.45905	-2.37703	-2.31266	-2.40135	-2.22254	-2.28834	-2.24924	-2.26259
4.81117	-2.52485	-2.43425	-2.36702	-2.31457	-2.41041	-2.26021	-2.30742	-2.27118	-2.28786
4.81783	-2.52867	-2.41232	-2.35367	-2.31314	-2.41709	-2.28834	-2.32029	-2.285	-2.30742
4.8245	-2.53105	-2.39754	-2.34365	-2.31266	-2.42472	-2.31075	-2.33126	-2.29836	-2.32315
4.83117	-2.53296	-2.39325	-2.34127	-2.316	-2.43425	-2.33078	-2.34127	-2.31314	-2.33984
4.83783	-2.53391	-2.40135	-2.34938	-2.32506	-2.44427	-2.34985	-2.35271	-2.3303	-2.35939
4.8445	-2.53439	-2.42281	-2.36797	-2.34175	-2.45523	-2.36702	-2.36464	-2.35033	-2.3818
4.85117	-2.53534	-2.45285	-2.39563	-2.36607	-2.46716	-2.3818	-2.37799	-2.37131	-2.40612
4.85783	-2.53773	-2.48861	-2.42901	-2.3942	-2.47908	-2.39372	-2.39086	-2.39325	-2.43044
4.8645	-2.54154	-2.52485	-2.46334	-2.42186	-2.48861	-2.40183	-2.39944	-2.41423	-2.45285
4.87117	-2.54583	-2.55918	-2.49481	-2.44665	-2.49529	-2.40564	-2.40612	-2.43187	-2.4724
4.87783	-2.55013	-2.58923	-2.52104	-2.4662	-2.50006	-2.4066	-2.41089	-2.44713	-2.48861
4.8845	-2.55442	-2.61307	-2.5425	-2.47908	-2.5034	-2.40612	-2.4147	-2.46048	-2.50053
4.89117	-2.55871	-2.62976	-2.55918	-2.48575	-2.50387	-2.4066	-2.41566	-2.4724	-2.50816
4.89783	-2.563	-2.64025	-2.57206	-2.48861	-2.5034	-2.40755	-2.41661	-2.48146	-2.51246
4.9045	-2.56538	-2.6474	-2.57969	-2.48861	-2.50292	-2.40946	-2.42043	-2.48861	-2.51484
4.91117	-2.56681	-2.65074	-2.58398	-2.48718	-2.5034	-2.41232	-2.42615	-2.49434	-2.51722
4.91783	-2.56681	-2.65121	-2.58636	-2.4848	-2.50387	-2.41661	-2.4333	-2.49958	-2.51913
4.9245	-2.56681	-2.64978	-2.58827	-2.48194	-2.50483	-2.42233	-2.43998	-2.5034	-2.51913
4.93117	-2.56634	-2.6474	-2.58923	-2.47955	-2.50673	-2.42615	-2.44665	-2.50673	-2.51913
4.93783	-2.56586	-2.64454	-2.58827	-2.47765	-2.50959	-2.42996	-2.45285	-2.50912	-2.51865
4.9445	-2.56252	-2.64072	-2.58589	-2.47622	-2.51293	-2.43282	-2.45762	-2.5115	-2.5177
4.95117	-2.55442	-2.63643	-2.58207	-2.47526	-2.51627	-2.43521	-2.46048	-2.5115	-2.51579
4.95783	-2.53868	-2.63262	-2.57683	-2.47526	-2.52008	-2.43616	-2.46239	-2.50959	-2.51341
4.9645	-2.50912	-2.6288	-2.57206	-2.47526	-2.52342	-2.43616	-2.46239	-2.5053	-2.50959
4.97117	-2.4538	-2.62308	-2.56777	-2.47526	-2.52295	-2.43521	-2.45953	-2.49815	-2.5034
4.97783	-2.35748	-2.61402	-2.56157	-2.47335	-2.5177	-2.43092	-2.4538	-2.48766	-2.4929
4.9845	-2.21014	-2.59972	-2.55251	-2.46811	-2.50483	-2.42043	-2.44141	-2.47097	-2.47574
4.99117	-2.01225	-2.57635	-2.53725	-2.45762	-2.47908	-2.39515	-2.41756	-2.44045	-2.44522
4.99783	-1.77813	-2.54011	-2.51102	-2.43759	-2.42996	-2.34318	-2.37131	-2.3818	-2.39086
5.0045	-1.5378	-2.48671	-2.46572	-2.4004	-2.34365	-2.24304	-2.28405	-2.27404	-2.2912
5.01117	-1.32895	-2.41327	-2.39563	-2.33603	-2.20346	-2.06852	-2.13051	-2.08998	-2.1162
5.01783	-1.18542	-2.32029	-2.29788	-2.23541	-1.99509	-1.78957	-1.88065	-1.79577	-1.82915
5.0245	-1.12867	-2.21348	-2.17056	-2.09141	-1.71137	-1.38807	-1.50871	-1.3628	-1.39952
5.03117	-1.16348	-2.10237	-2.0175	-1.90353	-1.36232	-0.866413	-1.00803	-0.784397	-0.814438
5.03783	-1.27649	-2.00033	-1.85204	-1.6818	-0.980377	-0.26226	-0.399113	-0.087738	-0.0967979
5.0445	-1.43909	-1.92118	-1.69611	-1.44863	-0.615597	0.357151	0.258923	0.66185	0.68903
5.05117	-1.62172	-1.87826	-1.5707	-1.23596	-0.320435	0.90313	0.880718	1.36852	1.44196
5.05783	-1.79958	-1.87826	-1.49632	-1.07765	-0.142574	1.28889	1.37138	1.9269	2.04659
5.0645	-1.95885	-1.92118	-1.48582	-0.999451	-0.110626	1.45197	1.65129	2.24638	2.4066
5.07117	-2.09475	-1.99795	-1.54018	-1.01233	-0.225067	1.37138	1.67847	2.27785	2.46572
5.07783	-2.20585	-2.09713	-1.64747	-1.11151	-0.457764	1.07431	1.45817	2.02703	2.22588
5.0845	-2.29359	-2.2049	-1.78766	-1.27602	-0.762463	0.623226	1.04189	1.55163	1.74236
5.09117	-2.36082	-2.30694	-1.9393	-1.47629	-1.09148	0.0987053	0.506401	0.939369	1.10865
5.09783	-2.41089	-2.39372	-2.08426	-1.6818	-1.40429	-0.424862	-0.0629425	0.286102	0.426769
5.1045	-2.44713	-2.46239	-2.20871	-1.86825	-1.67418	-0.893593	-0.597	-0.329018	-0.218391
5.11117	-2.4724	-2.51484	-2.30742	-2.02417	-1.88971	-1.27888	-1.05238	-0.855446	-0.771999
5.11783	-2.49004	-2.55251	-2.38228	-2.14529	-2.05326	-1.57595	-1.41478	-1.27316	-1.21355
5.1245	-2.50196	-2.57874	-2.43521	-2.23494	-2.17247	-1.79434	-1.68991	-1.58739	-1.54686
5.13117	-2.50912	-2.5959	-2.47145	-2.29836	-2.25735	-1.95217	-1.89066	-1.81627	-1.78862
5.13783	-2.51436	-2.60782	-2.49481	-2.3427	-2.316	-2.06518	-2.03466	-1.97887	-1.96028
5.1445	-2.5177	-2.61641	-2.51007	-2.3756	-2.35653	-2.14672	-2.13766	-2.09236	-2.08282
5.15117	-2.51961	-2.62213	-2.51913	-2.40088	-2.38609	-2.20633	-2.213	-2.17247	-2.16961
5.15783	-2.52008	-2.62451	-2.52533	-2.41995	-2.40803	-2.25163	-2.26831	-2.23207	-2.2316
5.1645	-2.52104	-2.62594	-2.53153	-2.43473	-2.42567	-2.28786	-2.30932	-2.2769	-2.2769
5.17117	-2.52342	-2.6288	-2.53773	-2.44617	-2.44093	-2.31838	-2.34079	-2.30932	-2.31075
5.17783	-2.52485	-2.63166	-2.54583	-2.45619	-2.45428	-2.34318	-2.36511	-2.33316	-2.33698
5.1845	-2.52724	-2.63548	-2.55585	-2.46429	-2.4662	-2.36273	-2.38514	-2.35128	-2.35844
5.19117	-2.5301	-2.63834	-2.56538	-2.47002	-2.47717	-2.37799	-2.40088	-2.36654	-2.37417
5.19783	-2.53153	-2.6412	-2.57301	-2.47478	-2.48575	-2.39038	-2.41375	-2.37942	-2.38657
5.2045	-2.53057	-2.64263	-2.57778	-2.47955	-2.49195	-2.39897	-2.42376	-2.38991	-2.39563
5.21117	-2.52819	-2.64311	-2.57969	-2.48432	-2.49672	-2.40374	-2.43139	-2.39992	-2.40374
5.21783	-2.52581	-2.64406	-2.58064	-2.48814	-2.50149	-2.40564	-2.43711	-2.40946	-2.41184
5.2245	-2.5239	-2.64406	-2.58064	-2.49147	-2.50435	-2.40612	-2.44045	-2.41709	-2.41852
5.23117	-2.52295	-2.64359	-2.58112	-2.49338	-2.50483	-2.40803	-2.44188	-2.42186	-2.42615
5.23783	-2.52485	-2.64406	-2.58255	-2.49434	-2.50244	-2.40946	-2.44188	-2.42472	-2.43425
5.2445	-2.52914	-2.64502	-2.58541	-2.49481	-2.49863	-2.41041	-2.44141	-2.42615	-2.44236
5.25117	-2.53487	-2.64645	-2.5878	-2.49434	-2.49434	-2.41137	-2.44141	-2.42615	-2.44856
5.25783	-2.54107	-2.64692	-2.5878	-2.49386	-2.48909	-2.41184	-2.44141	-2.42424	-2.4519
5.2645	-2.54631	-2.64549	-2.58684	-2.49195	-2.48384	-2.40993	-2.44093	-2.42138	-2.45285
5.27117	-2.55203	-2.63691	-2.5835	-2.48766	-2.47574	-2.40278	-2.43855	-2.4147	-2.44856
5.27783	-2.55728	-2.61402	-2.57063	-2.47669	-2.45523	-2.38228	-2.42901	-2.39801	-2.43282
5.2845	-2.56157	-2.56062	-2.53391	-2.44999	-2.40374	-2.33221	-2.39944	-2.35701	-2.38895
5.29117	-2.56395	-2.44761	-2.44713	-2.38705	-2.2831	-2.21634	-2.3222	-2.25782	-2.27928
5.29783	-2.56634	-2.23351	-2.26545	-2.25019	-2.0299	-1.96981	-2.14005	-2.03371	-2.02799
5.3045	-2.56872	-1.87302	-1.92356	-1.98126	-1.55973	-1.49822	-1.75905	-1.57022	-1.50824
5.31117	-2.56968	-1.33896	-1.35136	-1.51062	-0.787258	-0.696182	-1.05238	-0.712872	-0.549793
5.31783	-2.56777	-0.639915	-0.506401	-0.781059	0.335217	0.512123	0.109673	0.694275	1.01519
5.3245	-2.56538	0.164032	0.593662	0.218391	1.77479	2.12049	1.79625	2.73705	3.27539
5.33117	-2.56252	0.965595	1.85108	1.42431	3.39556	4.004	3.95536	5.35488	6.15406
5.33783	-2.55728	1.63651	3.09896	2.69604	4.97246	5.92232	6.3796	8.29697	9.37128
5.3445	-2.54774	2.05946	4.13513	3.83949	6.24609	7.57217	8.73137	11.1575	12.4769
5.35117	-2.53057	2.16484	4.78029	4.66013	6.99568	8.67033	10.6268	13.4716	14.9612
5.35783	-2.50149	1.95026	4.92764	5.0168	7.09867	9.03082	11.7373	14.8411	16.3932
5.3645	-2.45571	1.47533	4.57335	4.86231	6.56748	8.61835	11.8847	15.0466	16.5448
5.37117	-2.39182	0.842571	3.81422	4.25482	5.53799	7.55501	11.0884	14.1082	15.4514
5.37783	-2.31361	0.164509	2.81191	3.33452	4.22478	6.07347	9.55486	12.2705	13.3924
5.3845	-2.22969	-0.469685	1.74093	2.2769	2.85196	4.44269	7.60221	9.91535	10.7894
5.39117	-2.15197	-1.0066	0.741005	1.24073	1.59216	2.89011	5.55992	7.442	8.07762
5.39783	-2.09427	-1.42956	-0.104427	0.332356	0.541687	1.55735	3.68166	5.1589	5.59187
5.4045	-2.06757	-1.74761	-0.770092	-0.401974	-0.276566	0.496864	2.11048	3.23868	3.51477
5.41117	-2.07663	-1.9803	-1.27029	-0.961781	-0.885963	-0.304699	0.883579	1.73092	1.89161
5.41783	-2.11906	-2.15006	-1.63507	-1.37472	-1.32847	-0.889778	-0.0314713	0.600338	0.680447
5.4245	-2.18439	-2.27451	-1.89686	-1.67322	-1.64652	-1.30939	-0.695705	-0.224113	-0.198841
5.43117	-2.26116	-2.36654	-2.08378	-1.88875	-1.87445	-1.60885	-1.17207	-0.818253	-0.827313
5.43783	-2.33746	-2.43425	-2.21872	-2.04277	-2.03896	-1.82247	-1.51205	-1.24502	-1.27363
5.4445	-2.40374	-2.48384	-2.31695	-2.15387	-2.15769	-1.97458	-1.75428	-1.55115	-1.58882
5.45117	-2.4581	-2.52056	-2.38943	-2.23494	-2.244	-2.0833	-1.92928	-1.77145	-1.81103
5.45783	-2.4991	-2.54774	-2.44284	-2.29359	-2.30455	-2.1615	-2.0566	-1.93024	-1.96791
5.4645	-2.52819	-2.56681	-2.47908	-2.33698	-2.34795	-2.21825	-2.14958	-2.0442	-2.07949
5.47117	-2.54869	-2.57921	-2.50292	-2.36845	-2.37989	-2.26116	-2.21682	-2.12622	-2.15912
5.47783	-2.56395	-2.58827	-2.51818	-2.39468	-2.40469	-2.29311	-2.26498	-2.18487	-2.21586
5.4845	-2.5754	-2.59638	-2.52819	-2.41518	-2.42376	-2.31886	-2.30122	-2.22731	-2.25878
5.49117	-2.5835	-2.60401	-2.53487	-2.43092	-2.4395	-2.34079	-2.32887	-2.26021	-2.2912
5.49783	-2.5897	-2.61164	-2.53963	-2.44284	-2.4538	-2.35987	-2.35033	-2.28643	-2.31647
5.5045	-2.59638	-2.61879	-2.54631	-2.45237	-2.46716	-2.37703	-2.36702	-2.30885	-2.33698
5.51117	-2.60305	-2.6269	-2.55394	-2.46096	-2.4786	-2.39229	-2.38228	-2.32792	-2.35462
5.51783	-2.60925	-2.63596	-2.56252	-2.46811	-2.48957	-2.40517	-2.39754	-2.34509	-2.36988
5.5245	-2.61402	-2.64359	-2.57158	-2.47478	-2.49815	-2.41613	-2.4128	-2.35987	-2.38419
5.53117	-2.61354	-2.64597	-2.58064	-2.48194	-2.5053	-2.42519	-2.42567	-2.37274	-2.39706
5.53783	-2.59781	-2.63977	-2.58636	-2.48957	-2.50769	-2.42996	-2.43521	-2.38371	-2.40707
5.5445	-2.54917	-2.61545	-2.58493	-2.49195	-2.49958	-2.42615	-2.43902	-2.38943	-2.41184
5.55117	-2.44284	-2.55108	-2.56538	-2.48003	-2.46954	-2.40612	-2.43282	-2.38705	-2.4066
5.55783	-2.24113	-2.40374	-2.50196	-2.43616	-2.39229	-2.34985	-2.40469	-2.36559	-2.37846
5.5645	-1.90878	-2.1081	-2.35176	-2.32506	-2.22254	-2.21872	-2.33078	-2.30312	-2.29836
5.57117	-1.43099	-1.58501	-2.04659	-2.0895	-1.8878	-1.94979	-2.16484	-2.15578	-2.11573
5.57783	-0.833035	-0.771999	-1.5049	-1.6489	-1.30463	-1.46246	-1.83868	-1.8568	-1.75905
5.5845	-0.184536	0.33474	-0.658989	-0.929832	-0.411987	-0.684738	-1.27268	-1.32465	-1.14775
5.59117	0.41151	1.64413	0.495434	0.0944138	0.783443	0.404358	-0.414372	-0.496387	-0.23222
5.59783	0.846863	2.97594	1.86729	1.36614	2.17724	1.73521	0.723839	0.628471	0.965118
5.6045	1.04094	4.10414	3.2711	2.73371	3.57437	3.1414	2.03562	1.96028	2.32506
5.61117	0.962257	4.82178	4.47178	3.97968	4.73642	4.39501	3.33261	3.31688	3.64828
5.61783	0.638962	5.00059	5.2495	4.87947	5.44739	5.27	4.39119	4.47035	4.70448
5.6245	0.146389	4.6277	5.46551	5.26857	5.5809	5.6057	5.0168	5.20802	5.29909
5.63117	-0.418186	3.80611	5.10025	5.08881	5.13458	5.35488	5.0993	5.39923	5.33104
5.63783	-0.965118	2.7194	4.25577	4.40454	4.22621	4.59719	4.64582	5.03016	4.81987
5.6445	-1.43766	1.56784	3.12185	3.37791	3.05462	3.50761	3.77655	4.20284	3.89671
5.65117	-1.81389	0.509739	1.90973	2.21109	1.8301	2.29597	2.67744	3.1004	2.75564
5.65783	-2.09808	-0.370026	0.788212	1.08433	0.715256	1.14393	1.54209	1.92499	1.59216
5.6645	-2.30742	-1.0519	-0.147819	0.114441	-0.204086	0.163555	0.514507	0.839233	0.55027
5.67117	-2.46	-1.55878	-0.875473	-0.656605	-0.913143	-0.608921	-0.329971	-0.0677109	-0.301838
5.67783	-2.57015	-1.92738	-1.41668	-1.23882	-1.43814	-1.18876	-0.980854	-0.775337	-0.957966
5.6845	-2.64835	-2.19345	-1.81246	-1.66655	-1.8177	-1.61219	-1.46484	-1.30463	-1.44482
5.69117	-2.70414	-2.38323	-2.09999	-1.97554	-2.09045	-1.91784	-1.81866	-1.69182	-1.79911
5.69783	-2.74467	-2.51865	-2.30789	-2.19584	-2.285	-2.13623	-2.07424	-1.97172	-2.05374
5.7045	-2.77424	-2.6145	-2.4581	-2.35224	-2.42233	-2.28977	-2.25639	-2.17295	-2.23589
5.71117	-2.79665	-2.68126	-2.56443	-2.46191	-2.51913	-2.39706	-2.38466	-2.31647	-2.36368
5.71783	-2.81572	-2.72703	-2.63977	-2.53773	-2.58589	-2.47097	-2.47335	-2.41804	-2.45237
5.7245	-2.83289	-2.75803	-2.69175	-2.58923	-2.63309	-2.52199	-2.53344	-2.48861	-2.51389
5.73117	-2.84767	-2.78044	-2.72655	-2.62356	-2.66552	-2.55775	-2.57492	-2.53773	-2.55728
5.73783	-2.86007	-2.7957	-2.7504	-2.6474	-2.68888	-2.58398	-2.60401	-2.57158	-2.58827
5.7445	-2.87008	-2.80714	-2.76566	-2.66457	-2.70557	-2.60496	-2.62642	-2.59447	-2.61021
5.75117	-2.87867	-2.8162	-2.77615	-2.67744	-2.71893	-2.62165	-2.64454	-2.61116	-2.62642
5.75783	-2.88534	-2.82526	-2.78187	-2.6865	-2.73037	-2.63548	-2.65932	-2.62451	-2.64025
5.7645	-2.89059	-2.83384	-2.78521	-2.69508	-2.73991	-2.64645	-2.67172	-2.63596	-2.65265
5.77117	-2.89488	-2.84004	-2.78759	-2.70271	-2.74801	-2.65455	-2.68126	-2.64645	-2.66266
5.77783	-2.89774	-2.84243	-2.78854	-2.71082	-2.75517	-2.66075	-2.68793	-2.65551	-2.67076
5.7845	-2.89965	-2.841	-2.78854	-2.71749	-2.75993	-2.66457	-2.69222	-2.66314	-2.67506
5.79117	-2.90012	-2.8348	-2.78664	-2.72274	-2.76041	-2.66647	-2.69318	-2.66743	-2.67506
5.79783	-2.89774	-2.82288	-2.78139	-2.72465	-2.75564	-2.66361	-2.68984	-2.66647	-2.6679
5.8045	-2.89249	-2.8038	-2.77042	-2.72226	-2.74467	-2.65455	-2.68078	-2.65741	-2.65169
5.81117	-2.88582	-2.77996	-2.75183	-2.71273	-2.72942	-2.63834	-2.66552	-2.64025	-2.62594
5.81783	-2.87867	-2.75517	-2.72703	-2.69747	-2.70891	-2.61593	-2.64263	-2.61354	-2.59018
5.8245	-2.8739	-2.73323	-2.6989	-2.67792	-2.68555	-2.59161	-2.61354	-2.57969	-2.54869
5.83117	-2.87247	-2.71845	-2.6722	-2.65837	-2.66409	-2.5692	-2.5835	-2.54202	-2.50721
5.83783	-2.87485	-2.71273	-2.65312	-2.64263	-2.64835	-2.55299	-2.55728	-2.50721	-2.47192
5.8445	-2.88153	-2.71749	-2.64502	-2.63357	-2.64263	-2.54679	-2.54107	-2.48098	-2.44856
5.85117	-2.89249	-2.7318	-2.64883	-2.63453	-2.64692	-2.55299	-2.5363	-2.46954	-2.44236
5.85783	-2.90537	-2.75421	-2.66552	-2.64502	-2.6617	-2.56968	-2.54488	-2.47431	-2.4538
5.8645	-2.91872	-2.78044	-2.69127	-2.66361	-2.68412	-2.59256	-2.56634	-2.49434	-2.48146
5.87117	-2.93016	-2.80762	-2.72226	-2.68602	-2.71034	-2.61831	-2.59686	-2.52628	-2.51961
5.87783	-2.9397	-2.83241	-2.75373	-2.70891	-2.73657	-2.64311	-2.63071	-2.56395	-2.56109
5.8845	-2.94733	-2.85339	-2.7833	-2.73037	-2.75946	-2.66552	-2.66409	-2.60162	-2.60115
5.89117	-2.95258	-2.86961	-2.81048	-2.74849	-2.77758	-2.68507	-2.6927	-2.63643	-2.63834
5.89783	-2.95544	-2.88248	-2.83289	-2.76136	-2.7914	-2.70128	-2.71797	-2.66695	-2.66933
5.9045	-2.9583	-2.89202	-2.84958	-2.77042	-2.80142	-2.71511	-2.73848	-2.69175	-2.69318
5.91117	-2.96164	-2.89917	-2.86198	-2.77805	-2.80905	-2.72655	-2.75326	-2.7113	-2.7113
5.91783	-2.96593	-2.90442	-2.87008	-2.78568	-2.8162	-2.73705	-2.76375	-2.72655	-2.72655
5.9245	-2.97117	-2.90871	-2.87628	-2.79331	-2.82383	-2.74563	-2.77328	-2.73848	-2.73991
5.93117	-2.97594	-2.91348	-2.87962	-2.79999	-2.83384	-2.75278	-2.78234	-2.74706	-2.74897
5.93783	-2.98023	-2.91729	-2.88057	-2.80714	-2.84386	-2.75898	-2.79188	-2.75278	-2.75469
5.9445	-2.98405	-2.92063	-2.88248	-2.81477	-2.85292	-2.7647	-2.79999	-2.7566	-2.7585
5.95117	-2.98595	-2.92301	-2.88725	-2.82145	-2.86055	-2.76995	-2.80762	-2.75898	-2.76232
5.95783	-2.98643	-2.92492	-2.8944	-2.82574	-2.86674	-2.77424	-2.81382	-2.76089	-2.76375
5.9645	-2.98548	-2.92635	-2.90251	-2.8286	-2.87008	-2.77758	-2.81811	-2.76279	-2.76375
5.97117	-2.98595	-2.92635	-2.90966	-2.83194	-2.87056	-2.77996	-2.82049	-2.76518	-2.76279
5.97783	-2.98691	-2.92635	-2.91634	-2.8348	-2.86961	-2.78282	-2.82049	-2.76852	-2.76279
5.9845	-2.98929	-2.92635	-2.92206	-2.83718	-2.86818	-2.78473	-2.81954	-2.77185	-2.7647
5.99117	-2.99263	-2.9273	-2.9254	-2.83909	-2.8677	-2.78711	-2.81906	-2.77424	-2.76661
5.99783	-2.99835	-2.92873	-2.92778	-2.84195	-2.86818	-2.7895	-2.81906	-2.7771	-2.76756
6.0045	-3.00407	-2.93016	-2.93064	-2.84481	-2.86961	-2.79093	-2.81954	-2.78044	-2.76947
6.01117	-3.01027	-2.93446	-2.93493	-2.84767	-2.87247	-2.79284	-2.82049	-2.78378	-2.77281
6.01783	-3.01504	-2.94065	-2.93732	-2.85053	-2.87676	-2.79427	-2.82145	-2.78711	-2.77758
6.0245	-3.0179	-2.94733	-2.93779	-2.85339	-2.882	-2.79522	-2.82335	-2.79093	-2.78234
6.03117	-3.01933	-2.95305	-2.93684	-2.85625	-2.88773	-2.7957	-2.82621	-2.79427	-2.78711
6.03783	-3.01933	-2.95782	-2.93541	-2.85769	-2.89202	-2.7976	-2.83003	-2.79808	-2.7914
6.0445	-3.01886	-2.96211	-2.93303	-2.85912	-2.89536	-2.80094	-2.83432	-2.80285	-2.79474
6.05117	-3.0179	-2.96497	-2.92921	-2.85959	-2.89869	-2.80428	-2.83813	-2.80714	-2.79665
6.05783	-3.01743	-2.96497	-2.92778	-2.86055	-2.90108	-2.80666	-2.84195	-2.81143	-2.7976
6.0645	-3.01838	-2.96259	-2.92873	-2.86245	-2.90251	-2.80905	-2.84386	-2.81477	-2.7976
6.07117	-3.02076	-2.96116	-2.92826	-2.86388	-2.90298	-2.81191	-2.84386	-2.81858	-2.79808
6.07783	-3.02267	-2.95973	-2.92587	-2.86484	-2.90442	-2.81429	-2.84386	-2.82335	-2.79951
6.0845	-3.02362	-2.9583	-2.92397	-2.86436	-2.90585	-2.81668	-2.84338	-2.82669	-2.8019
6.09117	-3.02553	-2.95734	-2.92253	-2.86484	-2.9068	-2.81858	-2.84338	-2.8286	-2.80428
6.09783	-3.02744	-2.95782	-2.92158	-2.86627	-2.90871	-2.82192	-2.84481	-2.83003	-2.80666
6.1045	-3.02935	-2.95925	-2.92206	-2.86913	-2.91204	-2.82526	-2.84815	-2.83289	-2.80952
6.11117	-3.0303	-2.96116	-2.9254	-2.87294	-2.91634	-2.82955	-2.85339	-2.83575	-2.81382
6.11783	-3.03173	-2.96259	-2.93016	-2.87724	-2.92063	-2.8348	-2.85864	-2.83813	-2.81858
6.1245	-3.03316	-2.9645	-2.93446	-2.88296	-2.92397	-2.83957	-2.86245	-2.84004	-2.82431
6.13117	-3.03364	-2.96783	-2.93922	-2.88868	-2.92826	-2.84433	-2.86579	-2.84147	-2.83003
6.13783	-3.03364	-2.9707	-2.94304	-2.89297	-2.93159	-2.8491	-2.86818	-2.84243	-2.8348
6.1445	-3.03459	-2.97308	-2.9459	-2.89536	-2.93398	-2.85244	-2.86865	-2.84386	-2.83813
6.15117	-3.03698	-2.97546	-2.94685	-2.89679	-2.93636	-2.85339	-2.86818	-2.84576	-2.84004
6.15783	-3.04031	-2.97785	-2.9459	-2.89774	-2.93875	-2.85292	-2.86627	-2.84863	-2.84147
6.1645	-3.04365	-2.98119	-2.94447	-2.90012	-2.94113	-2.85292	-2.86627	-2.85292	-2.84338
6.17117	-3.04794	-2.98357	-2.94447	-2.90298	-2.94304	-2.85482	-2.86913	-2.85769	-2.84529
6.17783	-3.05223	-2.98595	-2.9459	-2.90537	-2.94495	-2.85864	-2.8739	-2.86293	-2.84815
6.1845	-3.05748	-2.98834	-2.94828	-2.90728	-2.94828	-2.86388	-2.88057	-2.86722	-2.85244
6.19117	-3.06225	-2.99168	-2.95115	-2.91014	-2.9521	-2.87008	-2.8882	-2.87151	-2.85816
6.19783	-3.06559	-2.99549	-2.95591	-2.91491	-2.95734	-2.87724	-2.89583	-2.87676	-2.86436
6.2045	-3.06845	-2.99883	-2.96354	-2.9192	-2.96211	-2.88296	-2.90298	-2.88105	-2.87104
6.21117	-3.06988	-3.00121	-2.9726	-2.92301	-2.9664	-2.8882	-2.90871	-2.88391	-2.87819
6.21783	-3.07083	-3.00264	-2.98166	-2.92778	-2.9707	-2.89345	-2.91252	-2.88773	-2.88439
6.2245	-3.0694	-3.00455	-2.99072	-2.9335	-2.97594	-2.89774	-2.91491	-2.89297	-2.88963
6.23117	-3.06654	-3.00694	-2.99931	-2.93922	-2.98023	-2.90155	-2.91729	-2.89774	-2.89297
6.23783	-3.06273	-3.00741	-3.00694	-2.94399	-2.98357	-2.90489	-2.9192	-2.89965	-2.89536
6.2445	-3.05843	-3.00694	-3.01027	-2.94733	-2.98595	-2.90728	-2.91967	-2.90012	-2.89679
6.25117	-3.05462	-3.00503	-3.00884	-2.94924	-2.98738	-2.90775	-2.91967	-2.89917	-2.89726
6.25783	-3.04985	-3.00312	-3.0036	-2.95067	-2.98786	-2.9068	-2.9192	-2.89869	-2.89679
6.2645	-3.04413	-3.00074	-2.99644	-2.95067	-2.98548	-2.90442	-2.91872	-2.89822	-2.89488
6.27117	-3.03888	-2.99692	-2.98834	-2.94876	-2.98166	-2.90251	-2.91729	-2.89631	-2.89202
6.27783	-3.03602	-2.99358	-2.98071	-2.94447	-2.97689	-2.90012	-2.91586	-2.8944	-2.88773
6.2845	-3.0365	-2.99215	-2.97451	-2.94018	-2.9726	-2.89726	-2.91491	-2.89392	-2.882
6.29117	-3.03841	-2.99263	-2.96927	-2.93684	-2.96831	-2.8944	-2.91395	-2.89488	-2.8758
6.29783	-3.04174	-2.99406	-2.9664	-2.93398	-2.96545	-2.89154	-2.91395	-2.89488	-2.87104
6.3045	-3.04651	-2.99549	-2.96593	-2.93207	-2.9645	-2.88963	-2.91443	-2.89392	-2.86818
6.31117	-3.05223	-2.99788	-2.96831	-2.93207	-2.96497	-2.88868	-2.91729	-2.89345	-2.86865
6.31783	-3.057	-3.00026	-2.9726	-2.93493	-2.96736	-2.88916	-2.9211	-2.89488	-2.87104
6.3245	-3.05939	-3.00264	-2.97689	-2.93875	-2.9707	-2.89202	-2.9254	-2.89822	-2.87485
6.33117	-3.05986	-3.0036	-2.98357	-2.94256	-2.97499	-2.89679	-2.93016	-2.90203	-2.88153
6.33783	-3.05986	-3.00312	-2.98977	-2.94781	-2.9788	-2.90203	-2.93541	-2.90585	-2.88868
6.3445	-3.05939	-3.00217	-2.99406	-2.95353	-2.98166	-2.90823	-2.93922	-2.91014	-2.89536
6.35117	-3.05796	-3.00121	-2.99454	-2.9583	-2.98405	-2.91348	-2.94209	-2.91443	-2.89965
6.35783	-3.05605	-3.00074	-2.99406	-2.95925	-2.98595	-2.91777	-2.94447	-2.91777	-2.90346

## Sheet: Fig6C
time (s)	ADPR	NAD+	nicotinamide (µM)	ADPR (+HPF1)	NAD+ (+HPF1)
1	2.8	200	6.5	2.6	188
10	7.1	159	40	47.6	119
25	9.7	130	70	81.5	83
50	13.2	100	101	111.6	49
120	17.9	59	145	146.7	15
300	21.8	19	187	158.1	0
600	23.1	5	203	156.5	0
1200	23.5	1	203	158	0
3600	23.4	0	206	162.7	0
