# Supplementary figures and images for: HPF1 and nucleosomes mediate a dramatic switch in activity of PARP1 from polymerase to hydrolase
Source: eLife journal article supplement (doi:10.7554/elife.65773), 2021-03-08

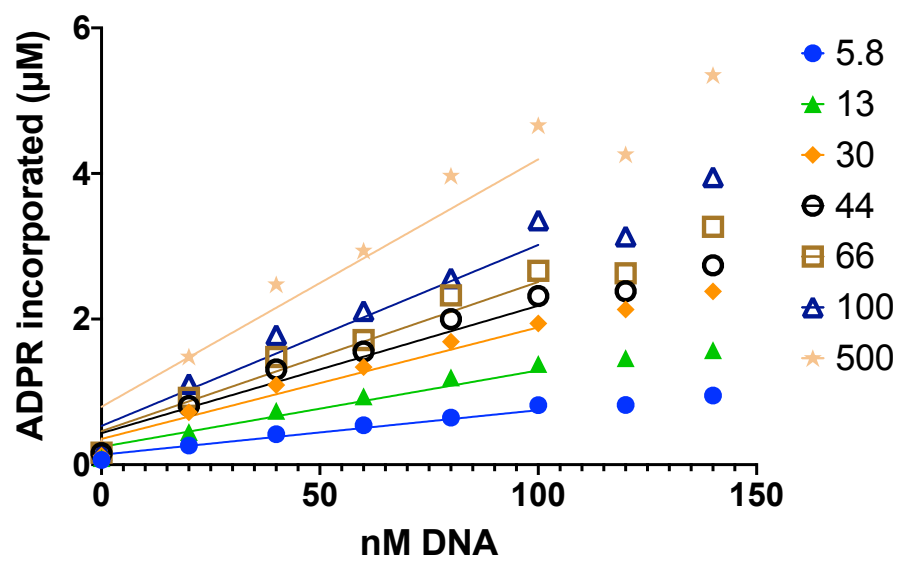

Fig. 2C, Supplementary Figure 1

Supplement: supp [file elife-65773-supp-v1.zip]
